# Supplementary material for: Driver lines for studying associative learning in Drosophila
Source: eLife. 2025 Jan 29;13:RP94168. doi: 10.7554/eLife.94168 (PMC11778931; doi:10.7554/eLife.94168)
Supplement: Figure 8—figure supplement 1—source data 1. [file elife-94168-fig8-figsupp1-data1.xlsx]

## Sheet: Figure8S1B
				time_ 1	time_ 2	time_ 3	time_ 4	time_ 5	time_ 6	time_ 7	time_ 8	time_ 9	time_ 10	time_ 11	time_ 12	time_ 13	time_ 14	time_ 15	time_ 16	time_ 17	time_ 18	time_ 19	time_ 20	time_ 21	time_ 22	time_ 23	time_ 24	time_ 25	time_ 26	time_ 27	time_ 28	time_ 29	time_ 30	time_ 31	time_ 32	time_ 33	time_ 34	time_ 35	time_ 36	time_ 37	time_ 38	time_ 39	time_ 40	time_ 41	time_ 42	time_ 43	time_ 44	time_ 45	time_ 46
			Time (s)	0	0.333333	0.666667	1	1.33333	1.66667	2	2.33333	2.66667	3	3.33333	3.66667	4	4.33333	4.66667	5	5.33333	5.66667	6	6.33333	6.66667	7	7.33333	7.66667	8	8.33333	8.66667	9	9.33333	9.66667	10	10.3333	10.6667	11	11.3333	11.6667	12	12.3333	12.6667	13	13.3333	13.6667	14	14.3333	14.6667	15
				Mean
DataType	Male	CS+ Odor	GroupCount	mean_ 1	mean_ 2	mean_ 3	mean_ 4	mean_ 5	mean_ 6	mean_ 7	mean_ 8	mean_ 9	mean_ 10	mean_ 11	mean_ 12	mean_ 13	mean_ 14	mean_ 15	mean_ 16	mean_ 17	mean_ 18	mean_ 19	mean_ 20	mean_ 21	mean_ 22	mean_ 23	mean_ 24	mean_ 25	mean_ 26	mean_ 27	mean_ 28	mean_ 29	mean_ 30	mean_ 31	mean_ 32	mean_ 33	mean_ 34	mean_ 35	mean_ 36	mean_ 37	mean_ 38	mean_ 39	mean_ 40	mean_ 41	mean_ 42	mean_ 43	mean_ 44	mean_ 45	mean_ 46
Preference (Zone1%)	SS87269	EL		0.503332	0.498461	0.500923	0.496008	0.49813	0.505924	0.51111	0.496791	0.500336	0.480849	0.480728	0.478506	0.493441	0.502907	0.529989	0.535941	0.545104	0.551165	0.543232	0.554823	0.53758	0.533658	0.524594	0.502959	0.517866	0.522496	0.508144	0.507615	0.498753	0.479682	0.467803	0.480968	0.48182	0.4821	0.482415	0.472678	0.466247	0.461988	0.473227	0.481587	0.485108	0.481953	0.479852	0.473452	0.479927	0.4719
				Mean
DataType	Male	CS+ Odor	GroupCount	mean_ 1	mean_ 2	mean_ 3	mean_ 4	mean_ 5	mean_ 6	mean_ 7	mean_ 8	mean_ 9	mean_ 10	mean_ 11	mean_ 12	mean_ 13	mean_ 14	mean_ 15	mean_ 16	mean_ 17	mean_ 18	mean_ 19	mean_ 20	mean_ 21	mean_ 22	mean_ 23	mean_ 24	mean_ 25	mean_ 26	mean_ 27	mean_ 28	mean_ 29	mean_ 30	mean_ 31	mean_ 32	mean_ 33	mean_ 34	mean_ 35	mean_ 36	mean_ 37	mean_ 38	mean_ 39	mean_ 40	mean_ 41	mean_ 42	mean_ 43	mean_ 44	mean_ 45	mean_ 46
Mov speed (mm/s)	SS87269	EL	15	2.98925	4.47589	4.70784	4.6946	4.74864	4.83463	4.76145	4.74168	4.60167	4.68794	4.74355	4.62779	4.57997	4.75015	4.76448	4.67637	4.763	4.77459	4.8655	4.90457	4.81692	5.09353	5.20937	5.14484	4.91844	4.75259	4.72455	4.86283	5.00696	5.08407	4.93585	4.76519	4.7794	4.85884	4.86156	4.87206	4.62398	4.6067	4.74403	4.80199	4.84537	4.90391	5.07723	5.10808	5.04467	4.81311
				SEM
DataType	Male	CS+ Odor	GroupCount	sem_ 1	sem_ 2	sem_ 3	sem_ 4	sem_ 5	sem_ 6	sem_ 7	sem_ 8	sem_ 9	sem_ 10	sem_ 11	sem_ 12	sem_ 13	sem_ 14	sem_ 15	sem_ 16	sem_ 17	sem_ 18	sem_ 19	sem_ 20	sem_ 21	sem_ 22	sem_ 23	sem_ 24	sem_ 25	sem_ 26	sem_ 27	sem_ 28	sem_ 29	sem_ 30	sem_ 31	sem_ 32	sem_ 33	sem_ 34	sem_ 35	sem_ 36	sem_ 37	sem_ 38	sem_ 39	sem_ 40	sem_ 41	sem_ 42	sem_ 43	sem_ 44	sem_ 45	sem_ 46
Mov speed (mm/s)	SS87269	EL	15	0.42514	0.49961	0.544511	0.535603	0.571052	0.607779	0.604239	0.605098	0.532218	0.547868	0.518884	0.539337	0.523117	0.555461	0.553334	0.575864	0.585958	0.524739	0.502491	0.555017	0.535524	0.570242	0.503271	0.589638	0.596221	0.601673	0.564731	0.532177	0.508983	0.549633	0.535255	0.519756	0.536067	0.523135	0.533715	0.512973	0.47248	0.494634	0.518871	0.541216	0.52114	0.536322	0.586394	0.576596	0.570372	0.508776
				Mean
DataType	Male	CS+ Odor	GroupCount	mean_ 1	mean_ 2	mean_ 3	mean_ 4	mean_ 5	mean_ 6	mean_ 7	mean_ 8	mean_ 9	mean_ 10	mean_ 11	mean_ 12	mean_ 13	mean_ 14	mean_ 15	mean_ 16	mean_ 17	mean_ 18	mean_ 19	mean_ 20	mean_ 21	mean_ 22	mean_ 23	mean_ 24	mean_ 25	mean_ 26	mean_ 27	mean_ 28	mean_ 29	mean_ 30	mean_ 31	mean_ 32	mean_ 33	mean_ 34	mean_ 35	mean_ 36	mean_ 37	mean_ 38	mean_ 39	mean_ 40	mean_ 41	mean_ 42	mean_ 43	mean_ 44	mean_ 45	mean_ 46
dist2wall (mm) Zone1	SS87269	EL	15	8.04314	8.21326	8.34334	8.28337	8.4045	8.49303	8.50443	8.64441	8.70518	8.29475	8.24162	8.09238	8.17722	8.40062	8.4901	8.55451	8.94929	9.20767	9.20657	9.02443	8.99447	8.79095	8.55751	8.22642	8.21851	8.13587	8.08829	8.01029	8.00968	8.3331	8.61841	8.80041	8.9271	8.86551	8.68784	8.65463	8.60293	8.93092	9.23663	9.4736	9.2906	8.96136	8.69471	8.61755	8.82922	8.88574
dist2wall (mm) Zone2	SS87269	EL	15	7.96827	8.35048	8.53798	8.77879	8.84471	8.78133	8.7521	8.74647	8.71234	9.06867	9.17316	9.4996	9.54113	9.31021	9.49097	9.35244	9.08994	8.98599	9.10942	9.09757	9.29839	9.28295	9.41875	9.46306	9.27241	9.29633	9.11849	9.02908	8.63231	8.31311	8.10792	8.03503	8.23713	8.62177	9.1582	9.45451	9.54761	9.40761	9.40982	9.38798	9.6509	9.69513	9.44307	9.10664	9.01844	9.06161
				SEM
DataType	Male	CS+ Odor	GroupCount	sem_ 1	sem_ 2	sem_ 3	sem_ 4	sem_ 5	sem_ 6	sem_ 7	sem_ 8	sem_ 9	sem_ 10	sem_ 11	sem_ 12	sem_ 13	sem_ 14	sem_ 15	sem_ 16	sem_ 17	sem_ 18	sem_ 19	sem_ 20	sem_ 21	sem_ 22	sem_ 23	sem_ 24	sem_ 25	sem_ 26	sem_ 27	sem_ 28	sem_ 29	sem_ 30	sem_ 31	sem_ 32	sem_ 33	sem_ 34	sem_ 35	sem_ 36	sem_ 37	sem_ 38	sem_ 39	sem_ 40	sem_ 41	sem_ 42	sem_ 43	sem_ 44	sem_ 45	sem_ 46
dist2wall (mm) Zone1	SS87269	EL	15	0.579628	0.574744	0.643495	0.561023	0.580068	0.621941	0.616073	0.646774	0.624664	0.540733	0.539675	0.486191	0.502934	0.560607	0.579786	0.590876	0.582657	0.658196	0.717109	0.777148	0.72922	0.702508	0.664881	0.598099	0.587915	0.588927	0.581259	0.566791	0.573466	0.628075	0.707088	0.759312	0.805447	0.842455	0.843746	0.886272	0.919774	1.02484	1.04701	1.03752	0.928092	0.835946	0.798986	0.810424	0.80427	0.707359
dist2wall (mm) Zone2	SS87269	EL	15	0.577731	0.605949	0.652192	0.681736	0.689841	0.652611	0.665648	0.6326	0.600501	0.655243	0.661284	0.680217	0.658555	0.56711	0.562837	0.573942	0.598186	0.535266	0.55743	0.552196	0.624863	0.643381	0.63801	0.686974	0.631174	0.606886	0.543211	0.443622	0.402337	0.380683	0.360072	0.403527	0.45726	0.48864	0.575948	0.633957	0.64212	0.632657	0.707768	0.663719	0.703741	0.714339	0.695022	0.632801	0.60834	0.601361
[truncated: 5,000 more columns]

## Sheet: Figure8S1C
DataType	Male	Odor	1x 20s train	2x 20s train	3x 20s train	Test1	Test2	Test3
Δdist2wall (mm)	SS87269	CS+	-3.05835	0.242115	-8.29038	-5.99792	-15.9456	-3.93014
Δdist2wall (mm)	SS87269	CS+	-0.598218	-5.77898	-0.147396	-7.05865	-15.498	-7.13661
Δdist2wall (mm)	SS87269	CS+	-3.33622	-7.87629	-9.49193	-15.9754	-8.80747	-30.6835
Δdist2wall (mm)	SS87269	CS+	-2.64595	-4.29105	-7.73725	-5.80219	-3.59069	-3.30543
Δdist2wall (mm)	SS87269	CS+	3.95992	0.00375244	-9.8698	-18.3545	-9.91696	-2.91195
Δdist2wall (mm)	SS87269	CS+	1.07341	-2.05615	-4.61864	-6.81368	-6.81216	-8.63657
Δdist2wall (mm)	SS87269	CS+	0.750278	-2.10129	0.619685	-0.826192	-9.13066	-9.2786
Δdist2wall (mm)	SS87269	CS+	-1.09069	-2.21572	-5.28419	-8.75053	-12.4681	0.722255
Δdist2wall (mm)	SS87269	CS+	0.353627	-2.19826	-2.41093	-3.48401	-1.38246	-5.26109
Δdist2wall (mm)	SS87269	CS+	-0.193163	-3.60653	-4.20378	-9.28097	-7.88232	-13.9427
Δdist2wall (mm)	SS87269	CS+	-1.15428	0.0708055	-1.06857	-2.36021	-0.175139	-19.0415
Δdist2wall (mm)	SS87269	CS+	-0.734117	-1.40486	-6.45421	-3.84326	-10.6042	-7.16299
Δdist2wall (mm)	SS87269	CS+	1.99712	-1.77709	-0.574275	-7.16555	-0.647857	-10.5891
Δdist2wall (mm)	SS87269	CS+	-1.89257	-4.65567	-7.22313	-16.2835	-14.0368	-9.25117
Δdist2wall (mm)	SS87269	CS+	-1.10499	-0.989929	-3.37488	-6.71161	-3.99492	-13.833
Δdist2wall (mm)	SS87269	CS+	-0.886767	-5.94732	-5.18283	-13.7409	-15.6825	-19.75
Δdist2wall (mm)	SS87269	CS+	-1.59027	-0.749935	-2.16224	-1.43947	-4.35611	-10.5021
Δdist2wall (mm)	SS87269	CS+	-0.456582	-2.92677	-0.673182	-3.67378	0.277319	-4.90579
Δdist2wall (mm)	SS87269	CS+	4.36497	0.110104	-0.153663	2.53773	-1.07625	-3.11025
Δdist2wall (mm)	SS87269	CS+	-3.81915	-3.80429	-2.76744	-1.31525	-5.47343	-17.2606
Δdist2wall (mm)	SS87269	CS+	-0.319662	-2.35966	-7.39099	5.55334	-1.03327	-4.80631
Δdist2wall (mm)	SS87269	CS+	-0.728535	2.21467	-0.58134	-5.22632	-4.90547	5.35948
Δdist2wall (mm)	SS87269	CS+	-3.09608	0.247397	0.509679	0.47585	-15.7119	-9.93548
Δdist2wall (mm)	SS87269	CS+	-0.841748	-2.82532	-2.99824	-14.5018	-8.26955	-3.11392
Δdist2wall (mm)	SS87269	CS+	-1.16277	-3.43602	-0.420923	-9.88231	-12.9018	-6.26834
Δdist2wall (mm)	SS87269	CS+	-1.12933	-4.97252	-4.59985	-11.3009	-3.01976	0.340386
Δdist2wall (mm)	SS87269	CS+	0.160231	-2.80867	-2.74836	-5.39981	2.8469	-9.72867
Δdist2wall (mm)	SS87269	CS+	-5.87055	-4.78934	-4.42487	-5.52057	-7.4982	0.191541
Δdist2wall (mm)	SS87269	CS+	1.50528	-1.45407	-1.88009	-3.87206	-10.8393	0.819676
Δdist2wall (mm)	SS87269	CS+	-1.82708	-4.82851	-0.964404	-11.1724	-11.1993	-5.31466
Δdist2wall (mm)	SS87269	CS-	0.474862	-5.17541	0.723086	-10.8958	-2.51788	-4.71667
Δdist2wall (mm)	SS87269	CS-	-3.88137	-1.27144	-5.13909	-12.4866	-2.32852	-2.31714
Δdist2wall (mm)	SS87269	CS-	0.843098	1.06382	-4.74117	-9.92999	-0.908814	-1.84535
Δdist2wall (mm)	SS87269	CS-	0.662446	2.72627	5.52299	12.6277	3.00676	-11.5994
Δdist2wall (mm)	SS87269	CS-	-5.52472	0.709418	-5.0505	0.988117	-1.77757	14.6128
Δdist2wall (mm)	SS87269	CS-	-6.5057	-7.7411	-3.69204	-11.0761	-4.62755	4.88984
Δdist2wall (mm)	SS87269	CS-	-2.17589	-4.81013	-0.193534	-3.89561	-18.3489	32.694
Δdist2wall (mm)	SS87269	CS-	-2.32068	-2.87818	5.10045	4.88823	0.57235	16.452
Δdist2wall (mm)	SS87269	CS-	0.187805	-5.31536	1.46836	-2.84806	-8.07313	-8.43111
Δdist2wall (mm)	SS87269	CS-	-4.02593	-4.79011	-7.01926	13.9514	-6.15287	8.74045
Δdist2wall (mm)	SS87269	CS-	-0.230109	0.102962	-2.19303	-0.400918	-13.9597	1.36566
Δdist2wall (mm)	SS87269	CS-	-0.910841	-1.29938	-0.503965	22.3627	1.40932	-13.0156
Δdist2wall (mm)	SS87269	CS-	-2.38271	-2.89427	-5.04828	6.57385	-3.73738	9.09721
Δdist2wall (mm)	SS87269	CS-	-1.37489	-5.39965	-10.1957	-21.0386	37.0859	20.1264
Δdist2wall (mm)	SS87269	CS-	-1.58111	0.173995	-2.12935	13.8736	4.01856	26.6531
Δdist2wall (mm)	SS87269	CS-	-1.89696	-4.32781	-8.03967	-2.6128	-10.9048	-15.9584
Δdist2wall (mm)	SS87269	CS-	-4.2699	-2.94695	3.20159	-1.99756	0.34833	9.01072
Δdist2wall (mm)	SS87269	CS-	-1.42274	-2.36497	0.152985	1.82441	-1.57512	-3.80776
Δdist2wall (mm)	SS87269	CS-	1.95488	-0.563877	-1.09216	-0.38239	5.81381	4.64938
Δdist2wall (mm)	SS87269	CS-	-0.191183	-0.987767	-2.58933	3.84478	-1.83111	-3.06943
Δdist2wall (mm)	SS87269	CS-	-0.0942744	-0.351242	-1.79737	-0.512692	6.03595	-5.56013
Δdist2wall (mm)	SS87269	CS-	-3.35186	-3.12502	0.0825161	6.87685	36.5041	-0.939734
Δdist2wall (mm)	SS87269	CS-	0.674918	-0.985212	1.73966	-7.01809	-5.19321	9.26657
Δdist2wall (mm)	SS87269	CS-	2.44829	-0.940294	-1.38615	-16.7851	-10.2519	3.97122
Δdist2wall (mm)	SS87269	CS-	1.18889	0.162617	-0.0759891	-2.6645	14.0985	1.51239
Δdist2wall (mm)	SS87269	CS-	-5.49007	2.4233	-5.92351	-9.56252	-2.61571	-3.4423
Δdist2wall (mm)	SS87269	CS-	-0.153794	-4.60327	-5.0143	-2.64954	-4.36903	-7.36731
Δdist2wall (mm)	SS87269	CS-	-2.2275	0.9549	-5.03892	-1.21601	-15.9567	-2.58136
Δdist2wall (mm)	SS87269	CS-	0.000421737	-3.71552	-0.34112	-8.25124	-3.37974	7.45568
Δdist2wall (mm)	SS87269	CS-	-0.216343	2.12978	-0.699166	-15.4356	-2.61639	-1.50988
Δdist2wall (mm)	SS87278	CS+	-1.91155	-0.54406	-2.2132	-4.3486	3.74632	-15.3953
Δdist2wall (mm)	SS87278	CS+	-1.01131	-4.51989	0.138064	1.42009	-0.355343	-0.994963
Δdist2wall (mm)	SS87278	CS+	0.337477	-1.54182	-3.38669	-0.329321	-4.63651
Δdist2wall (mm)	SS87278	CS+	1.17125	-3.85259	-6.68921	-5.89976	-0.683829
Δdist2wall (mm)	SS87278	CS+	-1.32922	-2.50236	0.585734	-0.924853	-0.198727	3.1164
Δdist2wall (mm)	SS87278	CS+	-2.20179	-0.826498	-0.486122	2.80066	0.456499	-3.93299
Δdist2wall (mm)	SS87278	CS+	-0.0226263	-1.56931	-1.79374	-5.01041	-0.335241	0.922565
Δdist2wall (mm)	SS87278	CS+	-0.0572603	-1.99456	-2.47113	-2.38697	-0.833178	0.933035
Δdist2wall (mm)	SS87278	CS+	-0.831292	-1.82669	1.08189	-5.64057	0.528378	2.64123
Δdist2wall (mm)	SS87278	CS+	-0.0880083	-2.65533	-2.93451	-2.61008	0.648309	3.26527
Δdist2wall (mm)	SS87278	CS+	0.0229997	-1.49586	-1.33272	-0.710758	-10.3325	-2.39143
Δdist2wall (mm)	SS87278	CS+	-1.51427	0.90517	-2.59435	0.407697	3.10531	-4.07763
Δdist2wall (mm)	SS87278	CS+	-3.80161	2.10579	-8.43414	0.190361	5.75224	1.09835
Δdist2wall (mm)	SS87278	CS+	-4.41134	-3.88264	-2.7591	0.278925	-3.0001	1.8004
Δdist2wall (mm)	SS87278	CS+	2.3251	-3.11361	-1.52715	-3.92245	-2.00686	3.64858
Δdist2wall (mm)	SS87278	CS+	-3.98045	0.640732	-4.09463	-10.8674	5.69403	2.36571
Δdist2wall (mm)	SS87278	CS+	-0.125061	0.321729	0.996545	0.861329	-6.29316
Δdist2wall (mm)	SS87278	CS+	-2.63041	-1.32928	-3.2153	-5.03412	2.02609
Δdist2wall (mm)	SS87278	CS-	-0.477882	-3.60853	3.15079	-5.05648	2.30734	1.73937
Δdist2wall (mm)	SS87278	CS-	-1.60217	-4.25842	-1.50612	-0.519197	1.90308	2.60058
Δdist2wall (mm)	SS87278	CS-	2.12472	0.874936	-1.42494	-5.51123	12.9441
Δdist2wall (mm)	SS87278	CS-	4.52871	-7.0369	-0.141807	-1.93406	-1.19379
Δdist2wall (mm)	SS87278	CS-	-0.802471	-2.57044	-1.49186	-4.27152	0.452538	-2.03879
Δdist2wall (mm)	SS87278	CS-	-3.29323	-2.60657	0.646422	-5.03572	0.949216	-1.02441
Δdist2wall (mm)	SS87278	CS-	0.312115	-0.722936	-1.79419	5.63945	-3.20375	-0.504893
Δdist2wall (mm)	SS87278	CS-	-2.28903	-5.70029	-1.01061	5.13158	-2.56347	-2.23626
Δdist2wall (mm)	SS87278	CS-	-2.43128	-2.30016	-1.1878	-2.28815	3.02832	-0.741261
Δdist2wall (mm)	SS87278	CS-	-3.447	-1.93981	-2.88474	4.84793	-5.31748	-2.43531
Δdist2wall (mm)	SS87278	CS-	-3.49578	-0.335046	-1.22302	-1.85486	1.14816	-2.45773
Δdist2wall (mm)	SS87278	CS-	-2.97864	-1.29237	-3.01988	-4.59702	-5.74658	-2.56982
Δdist2wall (mm)	SS87278	CS-	-2.03227	-4.13602	-1.80394	0.551901	-1.91788	0.683257
Δdist2wall (mm)	SS87278	CS-	-6.86913	-2.93452	-4.24496	-2.3403	-10.2322	6.55148
Δdist2wall (mm)	SS87278	CS-	-0.797878	-2.81242	-4.8636	-4.6067	4.52717	7.16664
Δdist2wall (mm)	SS87278	CS-	-4.1896	-3.83699	-5.6904	3.09304	-7.54391	-2.48165
Δdist2wall (mm)	SS87278	CS-	0.228343	-1.14603	-3.83783	9.04211	-6.45314
Δdist2wall (mm)	SS87278	CS-	-2.02129	-2.3952	-6.65421	-12.8884	-2.85196
Δdist2wall (mm)	Empty-split	CS+	1.91784	-1.46174	-2.26407	-12.2396	1.35347	0.117014
Δdist2wall (mm)	Empty-split	CS+	-2.73882	-0.874869	-0.474033	-6.2446	-0.292196	-1.51474
Δdist2wall (mm)	Empty-split	CS+	-0.37902	-5.12883	-6.14049	-10.2944	3.27728	4.86739
Δdist2wall (mm)	Empty-split	CS+	0.360824	0.473896	-2.19072	-6.46156	-5.33925	-2.83338
Δdist2wall (mm)	Empty-split	CS+	-3.99479	-5.60712	-3.22131	1.44277	-5.5899	-6.03036
Δdist2wall (mm)	Empty-split	CS+	1.27523	0.366409	-1.86709	1.1022	3.29143	-5.30245
Δdist2wall (mm)	Empty-split	CS+	0.223065	-4.17533	-3.83988	1.71704	-3.81502	-6.4205
Δdist2wall (mm)	Empty-split	CS+	-2.51844	-1.70025	-3.18335	-6.871	-3.63964	-4.61813
Δdist2wall (mm)	Empty-split	CS-	-3.95789	-4.85546	-3.11458	1.11362	1.77217	7.717
Δdist2wall (mm)	Empty-split	CS-	-2.89163	-5.3702	-4.95764	10.6155	-4.93749	2.14747
Δdist2wall (mm)	Empty-split	CS-	5.21792	-6.86376	-5.21518	1.35125	4.55314	-5.81798
Δdist2wall (mm)	Empty-split	CS-	-5.18108	-1.75359	-3.26231	-0.708123	6.45128	5.83042
Δdist2wall (mm)	Empty-split	CS-	-5.99575	-3.20771	-2.02561	-9.6094	-4.60986	2.02097
Δdist2wall (mm)	Empty-split	CS-	-5.09664	0.330803	0.583737	-1.39534	2.05202	-2.46131
Δdist2wall (mm)	Empty-split	CS-	-5.34572	-3.36371	-3.36619	-7.08605	0.644355	2.97315
Δdist2wall (mm)	Empty-split	CS-	-1.1805	-6.98915	-3.52236	2.2199	-4.92842	-2.50282
