# Supplementary material for: Driver lines for studying associative learning in Drosophila
Source: eLife. 2025 Jan 29;13:RP94168. doi: 10.7554/eLife.94168 (PMC11778931; doi:10.7554/eLife.94168)
Supplement: Figure 8—figure supplement 2—source data 1. [file elife-94168-fig8-figsupp2-data1.xlsx]

## Sheet: Figure8S2
Data_Type	Short Name	Male	Experiment ID	number of trials	Mean
revisit-10mmOut3mmIn-15s	P return	Empty-split	20191216T223344_Cam0	6	0.0932241
revisit-10mmOut3mmIn-15s	P return	Empty-split	20191216T223344_Cam1	6	0.067506
revisit-10mmOut3mmIn-15s	P return	Empty-split	20200225T140759_Cam0	6	0.164195
revisit-10mmOut3mmIn-15s	P return	Empty-split	20200225T140759_Cam1	6	0.148708
revisit-10mmOut3mmIn-15s	P return	Empty-split	20200225T142841_Cam0	6	0.0877032
revisit-10mmOut3mmIn-15s	P return	Empty-split	20200225T142841_Cam1	6	0.119419
revisit-10mmOut3mmIn-15s	P return	Empty-split	20200227T114833_Cam0	6	0.130777
revisit-10mmOut3mmIn-15s	P return	Empty-split	20200227T114833_Cam1	6	0.1558
revisit-10mmOut3mmIn-15s	P return	Empty-split	20200227T122542_Cam0	6	0.13636
revisit-10mmOut3mmIn-15s	P return	Empty-split	20200227T122542_Cam1	6	0.184346
revisit-10mmOut3mmIn-15s	P return	Empty-split	20191210T171446_Cam0	6	0.125652
revisit-10mmOut3mmIn-15s	P return	Empty-split	20191210T171446_Cam1	6	0.133971
revisit-10mmOut3mmIn-15s	P return	Empty-split	20191216T223759_Cam0	6	0.107443
revisit-10mmOut3mmIn-15s	P return	Empty-split	20191216T223759_Cam1	6	0.129368
revisit-10mmOut3mmIn-15s	P return	Empty-split	20200225T141140_Cam0	6	0.188631
revisit-10mmOut3mmIn-15s	P return	Empty-split	20200225T141140_Cam1	6	0.198818
revisit-10mmOut3mmIn-15s	P return	Empty-split	20200225T143219_Cam0	6	0.125271
revisit-10mmOut3mmIn-15s	P return	Empty-split	20200225T143219_Cam1	6	0.178067
revisit-10mmOut3mmIn-15s	P return	Empty-split	20200227T114836_Cam0	6	0.121633
revisit-10mmOut3mmIn-15s	P return	Empty-split	20200227T114836_Cam1	6	0.117615
revisit-10mmOut3mmIn-15s	P return	Empty-split	20200227T122617_Cam0	6	0.115963
revisit-10mmOut3mmIn-15s	P return	Empty-split	20200227T122617_Cam1	6	0.0997152
revisit-10mmOut3mmIn-15s	P return	Gr64fGAL4	20220209T225213_Cam0	6	0.0599363
revisit-10mmOut3mmIn-15s	P return	Gr64fGAL4	20220209T225213_Cam1	6	0.0555124
revisit-10mmOut3mmIn-15s	P return	Gr64fGAL4	20220209T225450_Cam0	6	0.094298
revisit-10mmOut3mmIn-15s	P return	Gr64fGAL4	20220209T225450_Cam1	6	0.0723962
revisit-10mmOut3mmIn-15s	P return	Gr64fGAL4	20220209T230847_Cam0	6	0.0741285
revisit-10mmOut3mmIn-15s	P return	Gr64fGAL4	20220209T230847_Cam1	6	0.098234
revisit-10mmOut3mmIn-15s	P return	Gr64fGAL4	20220209T231314_Cam0	6	0.16675
revisit-10mmOut3mmIn-15s	P return	Gr64fGAL4	20220209T231314_Cam1	6	0.103611
revisit-10mmOut3mmIn-15s	P return	Gr64fGAL4	20220210T020041_Cam0	6	0.0864207
revisit-10mmOut3mmIn-15s	P return	Gr64fGAL4	20220210T020041_Cam1	6	0.0715398
revisit-10mmOut3mmIn-15s	P return	Gr64fGAL4	20220210T020507_Cam0	6	0.105125
revisit-10mmOut3mmIn-15s	P return	Gr64fGAL4	20220210T020507_Cam1	6	0.119295
revisit-10mmOut3mmIn-15s	P return	SS87269	20220113T184856_Cam1	6	0.131393
revisit-10mmOut3mmIn-15s	P return	SS87269	20220113T185438_Cam0	6	0.196424
revisit-10mmOut3mmIn-15s	P return	SS87269	20220113T192814_Cam0	6	0.0792373
revisit-10mmOut3mmIn-15s	P return	SS87269	20220113T192814_Cam1	6	0.191184
revisit-10mmOut3mmIn-15s	P return	SS87269	20220113T193343_Cam0	6	0.233866
revisit-10mmOut3mmIn-15s	P return	SS87269	20220113T193343_Cam1	6	0.285908
revisit-10mmOut3mmIn-15s	P return	SS87269	20220210T002055_Cam0	6	0.234129
revisit-10mmOut3mmIn-15s	P return	SS87269	20220210T002055_Cam1	6	0.255323
revisit-10mmOut3mmIn-15s	P return	SS87269	20220210T002715_Cam0	6	0.320863
revisit-10mmOut3mmIn-15s	P return	SS87269	20220210T002715_Cam1	6	0.425418
revisit-10mmOut3mmIn-15s	P return	SS87269	20220413T175914_Cam0	6	0.339552
revisit-10mmOut3mmIn-15s	P return	SS87269	20220413T175914_Cam1	6	0.257151
revisit-10mmOut3mmIn-15s	P return	SS87269	20220413T180752_Cam0	6	0.315786
revisit-10mmOut3mmIn-15s	P return	SS87269	20220413T180752_Cam1	6	0.280492
revisit-10mmOut3mmIn-15s	P return	SS87269	20220413T181637_Cam0	6	0.318274
revisit-10mmOut3mmIn-15s	P return	SS87269	20220413T181637_Cam1	6	0.287004
revisit-10mmOut3mmIn-15s	P return	SS87269	20220413T182546_Cam0	6	0.308314
revisit-10mmOut3mmIn-15s	P return	SS87269	20220413T182546_Cam1	6	0.300431
revisit-10mmOut3mmIn-15s	P return	SS87269	20220113T184856_Cam0	5	0.0620585
revisit-10mmOut3mmIn-15s	P return	SS87269	20220113T185438_Cam1	5	0.243312
revisit-10mmOut3mmIn-15s	P return	SS88801	20220413T170242_Cam0	6	0.151709
revisit-10mmOut3mmIn-15s	P return	SS88801	20220413T170242_Cam1	6	0.0626931
revisit-10mmOut3mmIn-15s	P return	SS88801	20220413T170832_Cam0	5	0.0694254
revisit-10mmOut3mmIn-15s	P return	SS88801	20220413T170832_Cam1	6	0.112211
revisit-10mmOut3mmIn-15s	P return	SS88801	20220413T172653_Cam0	6	0.091439
revisit-10mmOut3mmIn-15s	P return	SS88801	20220413T172653_Cam1	6	0.0918255
revisit-10mmOut3mmIn-15s	P return	SS88801	20220418T183701_Cam1	6	0.10417
revisit-10mmOut3mmIn-15s	P return	SS88801	20220418T191532_Cam0	5	0.158587
revisit-10mmOut3mmIn-15s	P return	SS88801	20220418T191532_Cam1	6	0.132269
revisit-10mmOut3mmIn-15s	P return	SS88801	20220418T192443_Cam0	6	0.1709
revisit-10mmOut3mmIn-15s	P return	SS88801	20220418T192443_Cam1	6	0.119905
revisit-10mmOut3mmIn-15s	P return	SS88801	20220420T145534_Cam0	6	0.0536548
revisit-10mmOut3mmIn-15s	P return	SS88801	20220420T145534_Cam1	6	0.0667776
revisit-10mmOut3mmIn-15s	P return	SS88801	20220420T150421_Cam0	6	0.125227
revisit-10mmOut3mmIn-15s	P return	SS88801	20220420T150421_Cam1	6	0.0464818
revisit-10mmOut3mmIn-15s	P return	SS88801	20220420T152841_Cam0	6	0.092822
revisit-10mmOut3mmIn-15s	P return	SS88801	20220420T152841_Cam1	6	0.0574351
revisit-10mmOut3mmIn-15s	P return	SS88801	20220420T153601_Cam0	6	0.0419519
revisit-10mmOut3mmIn-15s	P return	SS88801	20220420T153601_Cam1	6	0.0700181
revisit-10mmOut3mmIn-15s	P return	SS88801	20220418T183701_Cam0	5	0.0892413
revisit-10mmOut3mmIn-15s	P return	SS88776	20220413T173639_Cam0	6	0.0955809
revisit-10mmOut3mmIn-15s	P return	SS88776	20220413T173639_Cam1	6	0.126113
revisit-10mmOut3mmIn-15s	P return	SS88776	20220413T174404_Cam0	6	0.057992
revisit-10mmOut3mmIn-15s	P return	SS88776	20220413T174404_Cam1	6	0.095693
revisit-10mmOut3mmIn-15s	P return	SS88776	20220413T175259_Cam0	6	0.23813
revisit-10mmOut3mmIn-15s	P return	SS88776	20220413T175259_Cam1	6	0.184028
revisit-10mmOut3mmIn-15s	P return	SS88776	20220418T193117_Cam0	6	0.126642
revisit-10mmOut3mmIn-15s	P return	SS88776	20220418T193117_Cam1	6	0.111261
revisit-10mmOut3mmIn-15s	P return	SS88776	20220418T193945_Cam0	6	0.136342
revisit-10mmOut3mmIn-15s	P return	SS88776	20220418T193945_Cam1	6	0.0979643
revisit-10mmOut3mmIn-15s	P return	SS88776	20220418T195311_Cam0	6	0.155797
revisit-10mmOut3mmIn-15s	P return	SS88776	20220418T195311_Cam1	6	0.155199
revisit-10mmOut3mmIn-15s	P return	SS88776	20220418T195851_Cam0	6	0.12411
revisit-10mmOut3mmIn-15s	P return	SS88776	20220418T195851_Cam1	6	0.120893
revisit-10mmOut3mmIn-15s	P return	SS88776	20220420T161714_Cam0	6	0.163533
revisit-10mmOut3mmIn-15s	P return	SS88776	20220420T161714_Cam1	6	0.159882
revisit-10mmOut3mmIn-15s	P return	SS88776	20220420T162326_Cam0	6	0.0953428
revisit-10mmOut3mmIn-15s	P return	SS88776	20220420T162326_Cam1	6	0.116908
revisit-10mmOut3mmIn-15s	P return	SS88776	20220420T164829_Cam0	6	0.0886098
revisit-10mmOut3mmIn-15s	P return	SS88776	20220420T164829_Cam1	6	0.0648006
revisit-10mmOut3mmIn-15s	P return	SS88776	20220420T165428_Cam0	6	0.112364
revisit-10mmOut3mmIn-15s	P return	SS88776	20220420T165428_Cam1	6	0.151297
revisit-10mmOut3mmIn-15s	P return	SS87272	20220113T153036_Cam0	5	0.00446629
revisit-10mmOut3mmIn-15s	P return	SS87272	20220113T153036_Cam1	6	0.0332147
revisit-10mmOut3mmIn-15s	P return	SS87272	20220113T153319_Cam0	6	0.0270861
revisit-10mmOut3mmIn-15s	P return	SS87272	20220113T153319_Cam1	6	0.0670786
revisit-10mmOut3mmIn-15s	P return	SS87272	20220113T160703_Cam0	6	0.0489934
revisit-10mmOut3mmIn-15s	P return	SS87272	20220113T160703_Cam1	6	0.0364286
revisit-10mmOut3mmIn-15s	P return	SS87272	20220113T161231_Cam0	6	0.0689258
revisit-10mmOut3mmIn-15s	P return	SS87272	20220113T161231_Cam1	6	0.0357014
revisit-10mmOut3mmIn-15s	P return	SS87272	20220209T235205_Cam0	6	0.134035
revisit-10mmOut3mmIn-15s	P return	SS87272	20220209T235205_Cam1	6	0.10675
revisit-10mmOut3mmIn-15s	P return	SS87272	20220209T235755_Cam0	6	0.140498
revisit-10mmOut3mmIn-15s	P return	SS87272	20220209T235755_Cam1	6	0.194077
revisit-10mmOut3mmIn-15s	P return	SS87272	20220413T125325_Cam0	6	0.0359528
revisit-10mmOut3mmIn-15s	P return	SS87272	20220413T125325_Cam1	6	0.022412
revisit-10mmOut3mmIn-15s	P return	SS87272	20220413T130126_Cam0	6	0.0789805
revisit-10mmOut3mmIn-15s	P return	SS87272	20220413T130126_Cam1	6	0.0538313
revisit-10mmOut3mmIn-15s	P return	SS87272	20220413T153517_Cam0	6	0.0724341
revisit-10mmOut3mmIn-15s	P return	SS87272	20220413T153517_Cam1	6	0.0646768
revisit-10mmOut3mmIn-15s	P return	SS87272	20220418T171819_Cam0	6	0.0849213
revisit-10mmOut3mmIn-15s	P return	SS87272	20220418T171819_Cam1	6	0.0690158
revisit-10mmOut3mmIn-15s	P return	SS87272	20220418T171828_Cam1	6	0.0615517
revisit-10mmOut3mmIn-15s	P return	SS87272	20220420T134623_Cam0	6	0.0734317
revisit-10mmOut3mmIn-15s	P return	SS87272	20220420T134623_Cam1	6	0.10455
revisit-10mmOut3mmIn-15s	P return	SS87272	20220420T135655_Cam0	6	0.0408059
revisit-10mmOut3mmIn-15s	P return	SS87272	20220420T135655_Cam1	6	0.0344221
revisit-10mmOut3mmIn-15s	P return	SS87278	20220113T114750_Cam0	6	0.0244535
revisit-10mmOut3mmIn-15s	P return	SS87278	20220113T114750_Cam1	6	0.0276757
revisit-10mmOut3mmIn-15s	P return	SS87278	20220113T115217_Cam0	6	0.00583645
revisit-10mmOut3mmIn-15s	P return	SS87278	20220113T115217_Cam1	6	0.0477768
revisit-10mmOut3mmIn-15s	P return	SS87278	20220114T175455_Cam0	6	0.1215
revisit-10mmOut3mmIn-15s	P return	SS87278	20220114T175455_Cam1	6	0.0994999
revisit-10mmOut3mmIn-15s	P return	SS87278	20220209T232417_Cam0	6	0.0997144
revisit-10mmOut3mmIn-15s	P return	SS87278	20220209T232417_Cam1	6	0.0586226
revisit-10mmOut3mmIn-15s	P return	SS87278	20220209T233043_Cam0	6	0.12487
revisit-10mmOut3mmIn-15s	P return	SS87278	20220209T233043_Cam1	6	0.0941477
revisit-10mmOut3mmIn-15s	P return	SS87278	20220413T131727_Cam0	6	0.025923
revisit-10mmOut3mmIn-15s	P return	SS87278	20220413T131727_Cam1	6	0.0330641
revisit-10mmOut3mmIn-15s	P return	SS87278	20220413T132321_Cam0	6	0.00671839
revisit-10mmOut3mmIn-15s	P return	SS87278	20220413T132321_Cam1	6	0.016069
revisit-10mmOut3mmIn-15s	P return	SS87278	20220418T173342_Cam0	5	0.0508824
revisit-10mmOut3mmIn-15s	P return	SS87278	20220420T140034_Cam1	6	0.0648716
revisit-10mmOut3mmIn-15s	P return	SS87278	20220418T173342_Cam1	5	0.0929853
revisit-10mmOut3mmIn-15s	P return	SS87279	20220113T141611_Cam0	6	0.0103406
revisit-10mmOut3mmIn-15s	P return	SS87279	20220113T141611_Cam1	6	0.0228402
revisit-10mmOut3mmIn-15s	P return	SS87279	20220113T142147_Cam0	6	0.0261965
revisit-10mmOut3mmIn-15s	P return	SS87279	20220113T145041_Cam0	6	0.0100004
revisit-10mmOut3mmIn-15s	P return	SS87279	20220113T145041_Cam1	6	0.0168206
revisit-10mmOut3mmIn-15s	P return	SS87279	20220113T145515_Cam0	6	0.0195433
revisit-10mmOut3mmIn-15s	P return	SS87279	20220113T145515_Cam1	6	0.0337944
revisit-10mmOut3mmIn-15s	P return	SS87279	20220209T233918_Cam0	6	0.0464028
revisit-10mmOut3mmIn-15s	P return	SS87279	20220209T233918_Cam1	6	0.0222409
revisit-10mmOut3mmIn-15s	P return	SS87279	20220209T234336_Cam0	6	0.0645797
revisit-10mmOut3mmIn-15s	P return	SS87279	20220209T234336_Cam1	6	0.0473847
revisit-10mmOut3mmIn-15s	P return	SS87279	20220413T134445_Cam0	6	0.0115461
revisit-10mmOut3mmIn-15s	P return	SS87279	20220413T134445_Cam1	6	0.00610715
revisit-10mmOut3mmIn-15s	P return	SS87279	20220413T135041_Cam0	6	0.052037
revisit-10mmOut3mmIn-15s	P return	SS87279	20220413T135041_Cam1	6	0.0307926
revisit-10mmOut3mmIn-15s	P return	SS87279	20220418T173434_Cam0	6	0.0105588
revisit-10mmOut3mmIn-15s	P return	SS87279	20220418T173434_Cam1	6	0.0162609
revisit-10mmOut3mmIn-15s	P return	SS87279	20220420T141130_Cam0	6	0.0832371
revisit-10mmOut3mmIn-15s	P return	SS87279	20220420T141130_Cam1	6	0.0277568
revisit-10mmOut3mmIn-15s	P return	SS87279	20220113T142147_Cam1	4	0.0913399
deltaSpeed-mmpersec	ΔSpeed (mm/s)	Empty-split	20191216T223344_Cam0	6	0.271188
deltaSpeed-mmpersec	ΔSpeed (mm/s)	Empty-split	20191216T223344_Cam1	6	0.851482
deltaSpeed-mmpersec	ΔSpeed (mm/s)	Empty-split	20200225T140759_Cam0	6	0.311902
deltaSpeed-mmpersec	ΔSpeed (mm/s)	Empty-split	20200225T140759_Cam1	6	0.620309
deltaSpeed-mmpersec	ΔSpeed (mm/s)	Empty-split	20200225T142841_Cam0	6	0.491599
deltaSpeed-mmpersec	ΔSpeed (mm/s)	Empty-split	20200225T142841_Cam1	6	0.406307
deltaSpeed-mmpersec	ΔSpeed (mm/s)	Empty-split	20200227T114833_Cam0	6	0.233278
deltaSpeed-mmpersec	ΔSpeed (mm/s)	Empty-split	20200227T114833_Cam1	6	0.464809
deltaSpeed-mmpersec	ΔSpeed (mm/s)	Empty-split	20200227T122542_Cam0	6	0.7817
deltaSpeed-mmpersec	ΔSpeed (mm/s)	Empty-split	20200227T122542_Cam1	6	0.172063
deltaSpeed-mmpersec	ΔSpeed (mm/s)	Empty-split	20191210T171446_Cam0	6	-0.134224
deltaSpeed-mmpersec	ΔSpeed (mm/s)	Empty-split	20191210T171446_Cam1	6	0.204587
deltaSpeed-mmpersec	ΔSpeed (mm/s)	Empty-split	20191216T223759_Cam0	6	0.340331
deltaSpeed-mmpersec	ΔSpeed (mm/s)	Empty-split	20191216T223759_Cam1	6	0.166227
deltaSpeed-mmpersec	ΔSpeed (mm/s)	Empty-split	20200225T141140_Cam0	6	0.785642
deltaSpeed-mmpersec	ΔSpeed (mm/s)	Empty-split	20200225T141140_Cam1	6	0.669571
deltaSpeed-mmpersec	ΔSpeed (mm/s)	Empty-split	20200225T143219_Cam0	6	0.399058
deltaSpeed-mmpersec	ΔSpeed (mm/s)	Empty-split	20200225T143219_Cam1	6	0.0912929
deltaSpeed-mmpersec	ΔSpeed (mm/s)	Empty-split	20200227T114836_Cam0	6	0.693104
deltaSpeed-mmpersec	ΔSpeed (mm/s)	Empty-split	20200227T114836_Cam1	6	0.79153
deltaSpeed-mmpersec	ΔSpeed (mm/s)	Empty-split	20200227T122617_Cam0	6	0.560736
deltaSpeed-mmpersec	ΔSpeed (mm/s)	Empty-split	20200227T122617_Cam1	6	0.623019
deltaSpeed-mmpersec	ΔSpeed (mm/s)	Gr64fGAL4	20220209T225213_Cam0	6	-0.531779
deltaSpeed-mmpersec	ΔSpeed (mm/s)	Gr64fGAL4	20220209T225213_Cam1	6	-0.251552
deltaSpeed-mmpersec	ΔSpeed (mm/s)	Gr64fGAL4	20220209T225450_Cam0	6	-0.477842
deltaSpeed-mmpersec	ΔSpeed (mm/s)	Gr64fGAL4	20220209T225450_Cam1	6	-0.639016
deltaSpeed-mmpersec	ΔSpeed (mm/s)	Gr64fGAL4	20220209T230847_Cam0	6	-0.685579
deltaSpeed-mmpersec	ΔSpeed (mm/s)	Gr64fGAL4	20220209T230847_Cam1	6	-0.789736
deltaSpeed-mmpersec	ΔSpeed (mm/s)	Gr64fGAL4	20220209T231314_Cam0	6	-0.873437
deltaSpeed-mmpersec	ΔSpeed (mm/s)	Gr64fGAL4	20220209T231314_Cam1	6	-0.692666
deltaSpeed-mmpersec	ΔSpeed (mm/s)	Gr64fGAL4	20220210T020041_Cam0	6	-0.627523
deltaSpeed-mmpersec	ΔSpeed (mm/s)	Gr64fGAL4	20220210T020041_Cam1	6	-0.619049
deltaSpeed-mmpersec	ΔSpeed (mm/s)	Gr64fGAL4	20220210T020507_Cam0	6	-0.640328
deltaSpeed-mmpersec	ΔSpeed (mm/s)	Gr64fGAL4	20220210T020507_Cam1	6	-0.526776
deltaSpeed-mmpersec	ΔSpeed (mm/s)	SS87269	20220113T184856_Cam1	6	-0.573395
deltaSpeed-mmpersec	ΔSpeed (mm/s)	SS87269	20220113T185438_Cam0	6	-1.15026
deltaSpeed-mmpersec	ΔSpeed (mm/s)	SS87269	20220113T192814_Cam0	6	-0.719648
deltaSpeed-mmpersec	ΔSpeed (mm/s)	SS87269	20220113T192814_Cam1	6	-0.980163
deltaSpeed-mmpersec	ΔSpeed (mm/s)	SS87269	20220113T193343_Cam0	6	-0.980446
deltaSpeed-mmpersec	ΔSpeed (mm/s)	SS87269	20220113T193343_Cam1	6	-1.31917
deltaSpeed-mmpersec	ΔSpeed (mm/s)	SS87269	20220210T002055_Cam0	6	-1.242
deltaSpeed-mmpersec	ΔSpeed (mm/s)	SS87269	20220210T002055_Cam1	6	-1.06774
deltaSpeed-mmpersec	ΔSpeed (mm/s)	SS87269	20220210T002715_Cam0	6	-1.32779
deltaSpeed-mmpersec	ΔSpeed (mm/s)	SS87269	20220210T002715_Cam1	6	-1.5951
deltaSpeed-mmpersec	ΔSpeed (mm/s)	SS87269	20220413T175914_Cam0	6	-1.64506
deltaSpeed-mmpersec	ΔSpeed (mm/s)	SS87269	20220413T175914_Cam1	6	-1.28503
deltaSpeed-mmpersec	ΔSpeed (mm/s)	SS87269	20220413T180752_Cam0	6	-1.3725
deltaSpeed-mmpersec	ΔSpeed (mm/s)	SS87269	20220413T180752_Cam1	6	-1.28135
deltaSpeed-mmpersec	ΔSpeed (mm/s)	SS87269	20220413T181637_Cam0	6	-1.73343
deltaSpeed-mmpersec	ΔSpeed (mm/s)	SS87269	20220413T181637_Cam1	6	-1.5286
deltaSpeed-mmpersec	ΔSpeed (mm/s)	SS87269	20220413T182546_Cam0	6	-1.35775
deltaSpeed-mmpersec	ΔSpeed (mm/s)	SS87269	20220413T182546_Cam1	6	-1.52735
deltaSpeed-mmpersec	ΔSpeed (mm/s)	SS87269	20220113T184856_Cam0	5	-0.465726
deltaSpeed-mmpersec	ΔSpeed (mm/s)	SS87269	20220113T185438_Cam1	5	-1.71749
deltaSpeed-mmpersec	ΔSpeed (mm/s)	SS88801	20220413T170242_Cam0	6	-1.80934
deltaSpeed-mmpersec	ΔSpeed (mm/s)	SS88801	20220413T170242_Cam1	6	-1.16891
deltaSpeed-mmpersec	ΔSpeed (mm/s)	SS88801	20220413T170832_Cam0	5	-1.68536
deltaSpeed-mmpersec	ΔSpeed (mm/s)	SS88801	20220413T170832_Cam1	6	-0.968512
deltaSpeed-mmpersec	ΔSpeed (mm/s)	SS88801	20220413T172653_Cam0	6	-0.910248
deltaSpeed-mmpersec	ΔSpeed (mm/s)	SS88801	20220413T172653_Cam1	6	-0.520967
deltaSpeed-mmpersec	ΔSpeed (mm/s)	SS88801	20220418T183701_Cam1	6	-1.21655
deltaSpeed-mmpersec	ΔSpeed (mm/s)	SS88801	20220418T191532_Cam0	5	-1.08062
deltaSpeed-mmpersec	ΔSpeed (mm/s)	SS88801	20220418T191532_Cam1	6	-0.943198
deltaSpeed-mmpersec	ΔSpeed (mm/s)	SS88801	20220418T192443_Cam0	6	-1.32294
deltaSpeed-mmpersec	ΔSpeed (mm/s)	SS88801	20220418T192443_Cam1	6	-0.776675
deltaSpeed-mmpersec	ΔSpeed (mm/s)	SS88801	20220420T145534_Cam0	6	-1.16098
deltaSpeed-mmpersec	ΔSpeed (mm/s)	SS88801	20220420T145534_Cam1	6	-0.660774
deltaSpeed-mmpersec	ΔSpeed (mm/s)	SS88801	20220420T150421_Cam0	6	-1.08457
deltaSpeed-mmpersec	ΔSpeed (mm/s)	SS88801	20220420T150421_Cam1	6	-0.32205
deltaSpeed-mmpersec	ΔSpeed (mm/s)	SS88801	20220420T152841_Cam0	6	-0.988628
deltaSpeed-mmpersec	ΔSpeed (mm/s)	SS88801	20220420T152841_Cam1	6	-1.17656
deltaSpeed-mmpersec	ΔSpeed (mm/s)	SS88801	20220420T153601_Cam0	6	-1.03529
deltaSpeed-mmpersec	ΔSpeed (mm/s)	SS88801	20220420T153601_Cam1	6	-1.2305
deltaSpeed-mmpersec	ΔSpeed (mm/s)	SS88801	20220418T183701_Cam0	5	-1.16583
deltaSpeed-mmpersec	ΔSpeed (mm/s)	SS88776	20220413T173639_Cam0	6	-1.17039
deltaSpeed-mmpersec	ΔSpeed (mm/s)	SS88776	20220413T173639_Cam1	6	-1.47866
deltaSpeed-mmpersec	ΔSpeed (mm/s)	SS88776	20220413T174404_Cam0	6	-1.0752
deltaSpeed-mmpersec	ΔSpeed (mm/s)	SS88776	20220413T174404_Cam1	6	-1.02908
deltaSpeed-mmpersec	ΔSpeed (mm/s)	SS88776	20220413T175259_Cam0	6	-1.39669
deltaSpeed-mmpersec	ΔSpeed (mm/s)	SS88776	20220413T175259_Cam1	6	-1.15015
deltaSpeed-mmpersec	ΔSpeed (mm/s)	SS88776	20220418T193117_Cam0	6	-0.83263
deltaSpeed-mmpersec	ΔSpeed (mm/s)	SS88776	20220418T193117_Cam1	6	-0.805624
deltaSpeed-mmpersec	ΔSpeed (mm/s)	SS88776	20220418T193945_Cam0	6	-1.25586
deltaSpeed-mmpersec	ΔSpeed (mm/s)	SS88776	20220418T193945_Cam1	6	-0.712336
deltaSpeed-mmpersec	ΔSpeed (mm/s)	SS88776	20220418T195311_Cam0	6	-1.03685
deltaSpeed-mmpersec	ΔSpeed (mm/s)	SS88776	20220418T195311_Cam1	6	-1.35257
deltaSpeed-mmpersec	ΔSpeed (mm/s)	SS88776	20220418T195851_Cam0	6	-0.926457
deltaSpeed-mmpersec	ΔSpeed (mm/s)	SS88776	20220418T195851_Cam1	6	-1.71336
deltaSpeed-mmpersec	ΔSpeed (mm/s)	SS88776	20220420T161714_Cam0	6	-1.17224
deltaSpeed-mmpersec	ΔSpeed (mm/s)	SS88776	20220420T161714_Cam1	6	-1.32502
deltaSpeed-mmpersec	ΔSpeed (mm/s)	SS88776	20220420T162326_Cam0	6	-1.37621
deltaSpeed-mmpersec	ΔSpeed (mm/s)	SS88776	20220420T162326_Cam1	6	-1.32972
deltaSpeed-mmpersec	ΔSpeed (mm/s)	SS88776	20220420T164829_Cam0	6	-0.737508
deltaSpeed-mmpersec	ΔSpeed (mm/s)	SS88776	20220420T164829_Cam1	6	-0.968262
deltaSpeed-mmpersec	ΔSpeed (mm/s)	SS88776	20220420T165428_Cam0	6	-1.1741
deltaSpeed-mmpersec	ΔSpeed (mm/s)	SS88776	20220420T165428_Cam1	6	-0.85014
deltaSpeed-mmpersec	ΔSpeed (mm/s)	SS87272	20220113T153036_Cam0	5	0.0211404
deltaSpeed-mmpersec	ΔSpeed (mm/s)	SS87272	20220113T153036_Cam1	6	0.0967042
deltaSpeed-mmpersec	ΔSpeed (mm/s)	SS87272	20220113T153319_Cam0	6	-0.0427002
deltaSpeed-mmpersec	ΔSpeed (mm/s)	SS87272	20220113T153319_Cam1	6	-0.200702
deltaSpeed-mmpersec	ΔSpeed (mm/s)	SS87272	20220113T160703_Cam0	6	0.0161225
deltaSpeed-mmpersec	ΔSpeed (mm/s)	SS87272	20220113T160703_Cam1	6	0.103158
deltaSpeed-mmpersec	ΔSpeed (mm/s)	SS87272	20220113T161231_Cam0	6	-0.142456
deltaSpeed-mmpersec	ΔSpeed (mm/s)	SS87272	20220113T161231_Cam1	6	-0.0251463
deltaSpeed-mmpersec	ΔSpeed (mm/s)	SS87272	20220209T235205_Cam0	6	-0.940882
deltaSpeed-mmpersec	ΔSpeed (mm/s)	SS87272	20220209T235205_Cam1	6	-0.387073
deltaSpeed-mmpersec	ΔSpeed (mm/s)	SS87272	20220209T235755_Cam0	6	-0.444781
deltaSpeed-mmpersec	ΔSpeed (mm/s)	SS87272	20220209T235755_Cam1	6	-0.849485
deltaSpeed-mmpersec	ΔSpeed (mm/s)	SS87272	20220413T125325_Cam0	6	-0.316212
deltaSpeed-mmpersec	ΔSpeed (mm/s)	SS87272	20220413T125325_Cam1	6	-0.164696
deltaSpeed-mmpersec	ΔSpeed (mm/s)	SS87272	20220413T130126_Cam0	6	-0.75806
deltaSpeed-mmpersec	ΔSpeed (mm/s)	SS87272	20220413T130126_Cam1	6	-0.432885
deltaSpeed-mmpersec	ΔSpeed (mm/s)	SS87272	20220413T153517_Cam0	6	-0.626639
deltaSpeed-mmpersec	ΔSpeed (mm/s)	SS87272	20220413T153517_Cam1	6	-0.492019
deltaSpeed-mmpersec	ΔSpeed (mm/s)	SS87272	20220418T171819_Cam0	6	-0.716291
deltaSpeed-mmpersec	ΔSpeed (mm/s)	SS87272	20220418T171819_Cam1	6	-0.585758
deltaSpeed-mmpersec	ΔSpeed (mm/s)	SS87272	20220418T171828_Cam1	6	-0.454571
deltaSpeed-mmpersec	ΔSpeed (mm/s)	SS87272	20220420T134623_Cam0	6	-0.215429
deltaSpeed-mmpersec	ΔSpeed (mm/s)	SS87272	20220420T134623_Cam1	6	-0.268909
deltaSpeed-mmpersec	ΔSpeed (mm/s)	SS87272	20220420T135655_Cam0	6	-0.579603
deltaSpeed-mmpersec	ΔSpeed (mm/s)	SS87272	20220420T135655_Cam1	6	-0.306295
deltaSpeed-mmpersec	ΔSpeed (mm/s)	SS87278	20220113T114750_Cam0	6	0.189355
deltaSpeed-mmpersec	ΔSpeed (mm/s)	SS87278	20220113T114750_Cam1	6	0.346385
deltaSpeed-mmpersec	ΔSpeed (mm/s)	SS87278	20220113T115217_Cam0	6	0.4793
deltaSpeed-mmpersec	ΔSpeed (mm/s)	SS87278	20220113T115217_Cam1	6	0.109427
deltaSpeed-mmpersec	ΔSpeed (mm/s)	SS87278	20220114T175455_Cam0	6	0.415832
deltaSpeed-mmpersec	ΔSpeed (mm/s)	SS87278	20220114T175455_Cam1	6	0.0113286
deltaSpeed-mmpersec	ΔSpeed (mm/s)	SS87278	20220209T232417_Cam0	6	0.069862
deltaSpeed-mmpersec	ΔSpeed (mm/s)	SS87278	20220209T232417_Cam1	6	0.155536
deltaSpeed-mmpersec	ΔSpeed (mm/s)	SS87278	20220209T233043_Cam0	6	0.188622
deltaSpeed-mmpersec	ΔSpeed (mm/s)	SS87278	20220209T233043_Cam1	6	0.175055
deltaSpeed-mmpersec	ΔSpeed (mm/s)	SS87278	20220413T131727_Cam0	6	0.517299
deltaSpeed-mmpersec	ΔSpeed (mm/s)	SS87278	20220413T131727_Cam1	6	0.44701
deltaSpeed-mmpersec	ΔSpeed (mm/s)	SS87278	20220413T132321_Cam0	6	0.419722
deltaSpeed-mmpersec	ΔSpeed (mm/s)	SS87278	20220413T132321_Cam1	6	0.413531
deltaSpeed-mmpersec	ΔSpeed (mm/s)	SS87278	20220418T173342_Cam0	5	0.803506
deltaSpeed-mmpersec	ΔSpeed (mm/s)	SS87278	20220420T140034_Cam1	6	0.807484
deltaSpeed-mmpersec	ΔSpeed (mm/s)	SS87278	20220418T173342_Cam1	5	0.95357
deltaSpeed-mmpersec	ΔSpeed (mm/s)	SS87279	20220113T141611_Cam0	6	0.780002
deltaSpeed-mmpersec	ΔSpeed (mm/s)	SS87279	20220113T141611_Cam1	6	0.941163
deltaSpeed-mmpersec	ΔSpeed (mm/s)	SS87279	20220113T142147_Cam0	6	1.03384
deltaSpeed-mmpersec	ΔSpeed (mm/s)	SS87279	20220113T145041_Cam0	6	1.24441
deltaSpeed-mmpersec	ΔSpeed (mm/s)	SS87279	20220113T145041_Cam1	6	1.43365
deltaSpeed-mmpersec	ΔSpeed (mm/s)	SS87279	20220113T145515_Cam0	6	1.31383
deltaSpeed-mmpersec	ΔSpeed (mm/s)	SS87279	20220113T145515_Cam1	6	2.47497
deltaSpeed-mmpersec	ΔSpeed (mm/s)	SS87279	20220209T233918_Cam0	6	0.290291
deltaSpeed-mmpersec	ΔSpeed (mm/s)	SS87279	20220209T233918_Cam1	6	0.321784
deltaSpeed-mmpersec	ΔSpeed (mm/s)	SS87279	20220209T234336_Cam0	6	1.06017
deltaSpeed-mmpersec	ΔSpeed (mm/s)	SS87279	20220209T234336_Cam1	6	0.639611
deltaSpeed-mmpersec	ΔSpeed (mm/s)	SS87279	20220413T134445_Cam0	6	0.254149
deltaSpeed-mmpersec	ΔSpeed (mm/s)	SS87279	20220413T134445_Cam1	6	0.0612388
deltaSpeed-mmpersec	ΔSpeed (mm/s)	SS87279	20220413T135041_Cam0	6	0.0728992
deltaSpeed-mmpersec	ΔSpeed (mm/s)	SS87279	20220413T135041_Cam1	6	-0.232326
deltaSpeed-mmpersec	ΔSpeed (mm/s)	SS87279	20220418T173434_Cam0	6	1.91706
deltaSpeed-mmpersec	ΔSpeed (mm/s)	SS87279	20220418T173434_Cam1	6	2.17466
deltaSpeed-mmpersec	ΔSpeed (mm/s)	SS87279	20220420T141130_Cam0	6	0.555576
deltaSpeed-mmpersec	ΔSpeed (mm/s)	SS87279	20220420T141130_Cam1	6	1.66823
deltaSpeed-mmpersec	ΔSpeed (mm/s)	SS87279	20220113T142147_Cam1	4	2.40319
deltaCurvature-degpermm on	ΔCurvature on (deg/mm)	Empty-split	20191216T223344_Cam0	6	-3.78751
deltaCurvature-degpermm on	ΔCurvature on (deg/mm)	Empty-split	20191216T223344_Cam1	6	-11.4918
deltaCurvature-degpermm on	ΔCurvature on (deg/mm)	Empty-split	20200225T140759_Cam0	6	-3.46615
deltaCurvature-degpermm on	ΔCurvature on (deg/mm)	Empty-split	20200225T140759_Cam1	6	-4.51649
deltaCurvature-degpermm on	ΔCurvature on (deg/mm)	Empty-split	20200225T142841_Cam0	6	-6.32547
deltaCurvature-degpermm on	ΔCurvature on (deg/mm)	Empty-split	20200225T142841_Cam1	6	-4.75827
deltaCurvature-degpermm on	ΔCurvature on (deg/mm)	Empty-split	20200227T114833_Cam0	6	-5.67462
deltaCurvature-degpermm on	ΔCurvature on (deg/mm)	Empty-split	20200227T114833_Cam1	6	-6.09229
deltaCurvature-degpermm on	ΔCurvature on (deg/mm)	Empty-split	20200227T122542_Cam0	6	-5.34898
deltaCurvature-degpermm on	ΔCurvature on (deg/mm)	Empty-split	20200227T122542_Cam1	6	3.56836
deltaCurvature-degpermm on	ΔCurvature on (deg/mm)	Empty-split	20191210T171446_Cam0	6	7.32697
deltaCurvature-degpermm on	ΔCurvature on (deg/mm)	Empty-split	20191210T171446_Cam1	6	6.78663
deltaCurvature-degpermm on	ΔCurvature on (deg/mm)	Empty-split	20191216T223759_Cam0	6	-3.61859
deltaCurvature-degpermm on	ΔCurvature on (deg/mm)	Empty-split	20191216T223759_Cam1	6	0.549437
deltaCurvature-degpermm on	ΔCurvature on (deg/mm)	Empty-split	20200225T141140_Cam0	6	-6.27691
deltaCurvature-degpermm on	ΔCurvature on (deg/mm)	Empty-split	20200225T141140_Cam1	6	-4.52909
deltaCurvature-degpermm on	ΔCurvature on (deg/mm)	Empty-split	20200225T143219_Cam0	6	-2.7458
deltaCurvature-degpermm on	ΔCurvature on (deg/mm)	Empty-split	20200225T143219_Cam1	6	4.70976
deltaCurvature-degpermm on	ΔCurvature on (deg/mm)	Empty-split	20200227T114836_Cam0	6	-12.3139
deltaCurvature-degpermm on	ΔCurvature on (deg/mm)	Empty-split	20200227T114836_Cam1	6	-8.73082
deltaCurvature-degpermm on	ΔCurvature on (deg/mm)	Empty-split	20200227T122617_Cam0	6	-9.94736
deltaCurvature-degpermm on	ΔCurvature on (deg/mm)	Empty-split	20200227T122617_Cam1	6	-10.6353
deltaCurvature-degpermm on	ΔCurvature on (deg/mm)	Gr64fGAL4	20220209T225213_Cam0	6	-6.28369
deltaCurvature-degpermm on	ΔCurvature on (deg/mm)	Gr64fGAL4	20220209T225213_Cam1	6	11.7083
deltaCurvature-degpermm on	ΔCurvature on (deg/mm)	Gr64fGAL4	20220209T225450_Cam0	6	4.55967
deltaCurvature-degpermm on	ΔCurvature on (deg/mm)	Gr64fGAL4	20220209T225450_Cam1	6	2.29554
deltaCurvature-degpermm on	ΔCurvature on (deg/mm)	Gr64fGAL4	20220209T230847_Cam0	6	12.4313
deltaCurvature-degpermm on	ΔCurvature on (deg/mm)	Gr64fGAL4	20220209T230847_Cam1	6	2.91598
deltaCurvature-degpermm on	ΔCurvature on (deg/mm)	Gr64fGAL4	20220209T231314_Cam0	6	16.9622
deltaCurvature-degpermm on	ΔCurvature on (deg/mm)	Gr64fGAL4	20220209T231314_Cam1	6	0.296449
deltaCurvature-degpermm on	ΔCurvature on (deg/mm)	Gr64fGAL4	20220210T020041_Cam0	6	-7.25939
deltaCurvature-degpermm on	ΔCurvature on (deg/mm)	Gr64fGAL4	20220210T020041_Cam1	6	-7.5194
deltaCurvature-degpermm on	ΔCurvature on (deg/mm)	Gr64fGAL4	20220210T020507_Cam0	6	-0.663307
deltaCurvature-degpermm on	ΔCurvature on (deg/mm)	Gr64fGAL4	20220210T020507_Cam1	6	-8.30928
deltaCurvature-degpermm on	ΔCurvature on (deg/mm)	SS87269	20220113T184856_Cam1	6	-8.94329
deltaCurvature-degpermm on	ΔCurvature on (deg/mm)	SS87269	20220113T185438_Cam0	6	32.7971
deltaCurvature-degpermm on	ΔCurvature on (deg/mm)	SS87269	20220113T192814_Cam0	6	3.20267
deltaCurvature-degpermm on	ΔCurvature on (deg/mm)	SS87269	20220113T192814_Cam1	6	-7.51247
deltaCurvature-degpermm on	ΔCurvature on (deg/mm)	SS87269	20220113T193343_Cam0	6	-3.02578
deltaCurvature-degpermm on	ΔCurvature on (deg/mm)	SS87269	20220113T193343_Cam1	6	14.7478
deltaCurvature-degpermm on	ΔCurvature on (deg/mm)	SS87269	20220210T002055_Cam0	6	49.5608
deltaCurvature-degpermm on	ΔCurvature on (deg/mm)	SS87269	20220210T002055_Cam1	6	12.2625
deltaCurvature-degpermm on	ΔCurvature on (deg/mm)	SS87269	20220210T002715_Cam0	6	22.0581
deltaCurvature-degpermm on	ΔCurvature on (deg/mm)	SS87269	20220210T002715_Cam1	6	19.7779
deltaCurvature-degpermm on	ΔCurvature on (deg/mm)	SS87269	20220413T175914_Cam0	6	31.6293
deltaCurvature-degpermm on	ΔCurvature on (deg/mm)	SS87269	20220413T175914_Cam1	6	19.1927
deltaCurvature-degpermm on	ΔCurvature on (deg/mm)	SS87269	20220413T180752_Cam0	6	22.4345
deltaCurvature-degpermm on	ΔCurvature on (deg/mm)	SS87269	20220413T180752_Cam1	6	16.8249
deltaCurvature-degpermm on	ΔCurvature on (deg/mm)	SS87269	20220413T181637_Cam0	6	15.9441
deltaCurvature-degpermm on	ΔCurvature on (deg/mm)	SS87269	20220413T181637_Cam1	6	16.5176
deltaCurvature-degpermm on	ΔCurvature on (deg/mm)	SS87269	20220413T182546_Cam0	6	12.3605
deltaCurvature-degpermm on	ΔCurvature on (deg/mm)	SS87269	20220413T182546_Cam1	6	19.2306
deltaCurvature-degpermm on	ΔCurvature on (deg/mm)	SS87269	20220113T184856_Cam0	5	2.28954
deltaCurvature-degpermm on	ΔCurvature on (deg/mm)	SS87269	20220113T185438_Cam1	5	33.0969
deltaCurvature-degpermm on	ΔCurvature on (deg/mm)	SS88801	20220413T170242_Cam0	6	56.1343
deltaCurvature-degpermm on	ΔCurvature on (deg/mm)	SS88801	20220413T170242_Cam1	6	35.9518
deltaCurvature-degpermm on	ΔCurvature on (deg/mm)	SS88801	20220413T170832_Cam0	5	21.3219
deltaCurvature-degpermm on	ΔCurvature on (deg/mm)	SS88801	20220413T170832_Cam1	6	48.8011
deltaCurvature-degpermm on	ΔCurvature on (deg/mm)	SS88801	20220413T172653_Cam0	6	43.0048
deltaCurvature-degpermm on	ΔCurvature on (deg/mm)	SS88801	20220413T172653_Cam1	6	0.358981
deltaCurvature-degpermm on	ΔCurvature on (deg/mm)	SS88801	20220418T183701_Cam1	6	33.4344
deltaCurvature-degpermm on	ΔCurvature on (deg/mm)	SS88801	20220418T191532_Cam0	5	19.4666
deltaCurvature-degpermm on	ΔCurvature on (deg/mm)	SS88801	20220418T191532_Cam1	6	15.2727
deltaCurvature-degpermm on	ΔCurvature on (deg/mm)	SS88801	20220418T192443_Cam0	6	28.2923
deltaCurvature-degpermm on	ΔCurvature on (deg/mm)	SS88801	20220418T192443_Cam1	6	15.3107
deltaCurvature-degpermm on	ΔCurvature on (deg/mm)	SS88801	20220420T145534_Cam0	6	23.6947
deltaCurvature-degpermm on	ΔCurvature on (deg/mm)	SS88801	20220420T145534_Cam1	6	46.9508
deltaCurvature-degpermm on	ΔCurvature on (deg/mm)	SS88801	20220420T150421_Cam0	6	27.1679
deltaCurvature-degpermm on	ΔCurvature on (deg/mm)	SS88801	20220420T150421_Cam1	6	41.8143
deltaCurvature-degpermm on	ΔCurvature on (deg/mm)	SS88801	20220420T152841_Cam0	6	51.6932
deltaCurvature-degpermm on	ΔCurvature on (deg/mm)	SS88801	20220420T152841_Cam1	6	31.1536
deltaCurvature-degpermm on	ΔCurvature on (deg/mm)	SS88801	20220420T153601_Cam0	6	47.7804
deltaCurvature-degpermm on	ΔCurvature on (deg/mm)	SS88801	20220420T153601_Cam1	6	32.7782
deltaCurvature-degpermm on	ΔCurvature on (deg/mm)	SS88801	20220418T183701_Cam0	5	33.8644
deltaCurvature-degpermm on	ΔCurvature on (deg/mm)	SS88776	20220413T173639_Cam0	6	16.4633
deltaCurvature-degpermm on	ΔCurvature on (deg/mm)	SS88776	20220413T173639_Cam1	6	45.6417
deltaCurvature-degpermm on	ΔCurvature on (deg/mm)	SS88776	20220413T174404_Cam0	6	52.503
deltaCurvature-degpermm on	ΔCurvature on (deg/mm)	SS88776	20220413T174404_Cam1	6	27.56
deltaCurvature-degpermm on	ΔCurvature on (deg/mm)	SS88776	20220413T175259_Cam0	6	30.6466
deltaCurvature-degpermm on	ΔCurvature on (deg/mm)	SS88776	20220413T175259_Cam1	6	26.7454
deltaCurvature-degpermm on	ΔCurvature on (deg/mm)	SS88776	20220418T193117_Cam0	6	7.41968
deltaCurvature-degpermm on	ΔCurvature on (deg/mm)	SS88776	20220418T193117_Cam1	6	9.16264
deltaCurvature-degpermm on	ΔCurvature on (deg/mm)	SS88776	20220418T193945_Cam0	6	29.748
deltaCurvature-degpermm on	ΔCurvature on (deg/mm)	SS88776	20220418T193945_Cam1	6	13.0737
deltaCurvature-degpermm on	ΔCurvature on (deg/mm)	SS88776	20220418T195311_Cam0	6	16.0167
deltaCurvature-degpermm on	ΔCurvature on (deg/mm)	SS88776	20220418T195311_Cam1	6	27.8584
deltaCurvature-degpermm on	ΔCurvature on (deg/mm)	SS88776	20220418T195851_Cam0	6	36.7957
deltaCurvature-degpermm on	ΔCurvature on (deg/mm)	SS88776	20220418T195851_Cam1	6	30.7611
deltaCurvature-degpermm on	ΔCurvature on (deg/mm)	SS88776	20220420T161714_Cam0	6	24.2796
deltaCurvature-degpermm on	ΔCurvature on (deg/mm)	SS88776	20220420T161714_Cam1	6	33.5969
deltaCurvature-degpermm on	ΔCurvature on (deg/mm)	SS88776	20220420T162326_Cam0	6	21.4314
deltaCurvature-degpermm on	ΔCurvature on (deg/mm)	SS88776	20220420T162326_Cam1	6	39.0062
deltaCurvature-degpermm on	ΔCurvature on (deg/mm)	SS88776	20220420T164829_Cam0	6	29.5024
deltaCurvature-degpermm on	ΔCurvature on (deg/mm)	SS88776	20220420T164829_Cam1	6	8.79428
deltaCurvature-degpermm on	ΔCurvature on (deg/mm)	SS88776	20220420T165428_Cam0	6	10.3067
deltaCurvature-degpermm on	ΔCurvature on (deg/mm)	SS88776	20220420T165428_Cam1	6	-0.801762
deltaCurvature-degpermm on	ΔCurvature on (deg/mm)	SS87272	20220113T153036_Cam0	5	18.6301
deltaCurvature-degpermm on	ΔCurvature on (deg/mm)	SS87272	20220113T153036_Cam1	6	64.1846
deltaCurvature-degpermm on	ΔCurvature on (deg/mm)	SS87272	20220113T153319_Cam0	6	-10.6218
deltaCurvature-degpermm on	ΔCurvature on (deg/mm)	SS87272	20220113T153319_Cam1	6	12.1265
deltaCurvature-degpermm on	ΔCurvature on (deg/mm)	SS87272	20220113T160703_Cam0	6	14.1451
deltaCurvature-degpermm on	ΔCurvature on (deg/mm)	SS87272	20220113T160703_Cam1	6	-6.74728
deltaCurvature-degpermm on	ΔCurvature on (deg/mm)	SS87272	20220113T161231_Cam0	6	10.8742
deltaCurvature-degpermm on	ΔCurvature on (deg/mm)	SS87272	20220113T161231_Cam1	6	7.22544
deltaCurvature-degpermm on	ΔCurvature on (deg/mm)	SS87272	20220209T235205_Cam0	6	24.2399
deltaCurvature-degpermm on	ΔCurvature on (deg/mm)	SS87272	20220209T235205_Cam1	6	13.3021
deltaCurvature-degpermm on	ΔCurvature on (deg/mm)	SS87272	20220209T235755_Cam0	6	19.4767
deltaCurvature-degpermm on	ΔCurvature on (deg/mm)	SS87272	20220209T235755_Cam1	6	27.6542
deltaCurvature-degpermm on	ΔCurvature on (deg/mm)	SS87272	20220413T125325_Cam0	6	37.7731
deltaCurvature-degpermm on	ΔCurvature on (deg/mm)	SS87272	20220413T125325_Cam1	6	29.5078
deltaCurvature-degpermm on	ΔCurvature on (deg/mm)	SS87272	20220413T130126_Cam0	6	19.0321
deltaCurvature-degpermm on	ΔCurvature on (deg/mm)	SS87272	20220413T130126_Cam1	6	18.2444
deltaCurvature-degpermm on	ΔCurvature on (deg/mm)	SS87272	20220413T153517_Cam0	6	13.4284
deltaCurvature-degpermm on	ΔCurvature on (deg/mm)	SS87272	20220413T153517_Cam1	6	28.5203
deltaCurvature-degpermm on	ΔCurvature on (deg/mm)	SS87272	20220418T171819_Cam0	6	18.8408
deltaCurvature-degpermm on	ΔCurvature on (deg/mm)	SS87272	20220418T171819_Cam1	6	18.6124
deltaCurvature-degpermm on	ΔCurvature on (deg/mm)	SS87272	20220418T171828_Cam1	6	25.0171
deltaCurvature-degpermm on	ΔCurvature on (deg/mm)	SS87272	20220420T134623_Cam0	6	23.7168
deltaCurvature-degpermm on	ΔCurvature on (deg/mm)	SS87272	20220420T134623_Cam1	6	13.3437
deltaCurvature-degpermm on	ΔCurvature on (deg/mm)	SS87272	20220420T135655_Cam0	6	39.1848
deltaCurvature-degpermm on	ΔCurvature on (deg/mm)	SS87272	20220420T135655_Cam1	6	23.2246
deltaCurvature-degpermm on	ΔCurvature on (deg/mm)	SS87278	20220113T114750_Cam0	6	-7.02979
deltaCurvature-degpermm on	ΔCurvature on (deg/mm)	SS87278	20220113T114750_Cam1	6	17.5699
deltaCurvature-degpermm on	ΔCurvature on (deg/mm)	SS87278	20220113T115217_Cam0	6	-5.81125
deltaCurvature-degpermm on	ΔCurvature on (deg/mm)	SS87278	20220113T115217_Cam1	6	-4.63068
deltaCurvature-degpermm on	ΔCurvature on (deg/mm)	SS87278	20220114T175455_Cam0	6	-0.894646
deltaCurvature-degpermm on	ΔCurvature on (deg/mm)	SS87278	20220114T175455_Cam1	6	17.809
deltaCurvature-degpermm on	ΔCurvature on (deg/mm)	SS87278	20220209T232417_Cam0	6	1.00222
deltaCurvature-degpermm on	ΔCurvature on (deg/mm)	SS87278	20220209T232417_Cam1	6	1.62911
deltaCurvature-degpermm on	ΔCurvature on (deg/mm)	SS87278	20220209T233043_Cam0	6	-5.26933
deltaCurvature-degpermm on	ΔCurvature on (deg/mm)	SS87278	20220209T233043_Cam1	6	-1.85721
deltaCurvature-degpermm on	ΔCurvature on (deg/mm)	SS87278	20220413T131727_Cam0	6	2.37007
deltaCurvature-degpermm on	ΔCurvature on (deg/mm)	SS87278	20220413T131727_Cam1	6	-3.6694
deltaCurvature-degpermm on	ΔCurvature on (deg/mm)	SS87278	20220413T132321_Cam0	6	3.97318
deltaCurvature-degpermm on	ΔCurvature on (deg/mm)	SS87278	20220413T132321_Cam1	6	5.30373
deltaCurvature-degpermm on	ΔCurvature on (deg/mm)	SS87278	20220418T173342_Cam0	5	-3.1219
deltaCurvature-degpermm on	ΔCurvature on (deg/mm)	SS87278	20220420T140034_Cam1	6	1.40879
deltaCurvature-degpermm on	ΔCurvature on (deg/mm)	SS87278	20220418T173342_Cam1	5	-8.61596
deltaCurvature-degpermm on	ΔCurvature on (deg/mm)	SS87279	20220113T141611_Cam0	6	20.8488
deltaCurvature-degpermm on	ΔCurvature on (deg/mm)	SS87279	20220113T141611_Cam1	6	12.4548
deltaCurvature-degpermm on	ΔCurvature on (deg/mm)	SS87279	20220113T142147_Cam0	6	-19.4757
deltaCurvature-degpermm on	ΔCurvature on (deg/mm)	SS87279	20220113T145041_Cam0	6	-1.56046
deltaCurvature-degpermm on	ΔCurvature on (deg/mm)	SS87279	20220113T145041_Cam1	6	NaN
deltaCurvature-degpermm on	ΔCurvature on (deg/mm)	SS87279	20220113T145515_Cam0	6	3.3758
deltaCurvature-degpermm on	ΔCurvature on (deg/mm)	SS87279	20220113T145515_Cam1	6	-19.6971
deltaCurvature-degpermm on	ΔCurvature on (deg/mm)	SS87279	20220209T233918_Cam0	6	-21.7274
deltaCurvature-degpermm on	ΔCurvature on (deg/mm)	SS87279	20220209T233918_Cam1	6	-20.5095
deltaCurvature-degpermm on	ΔCurvature on (deg/mm)	SS87279	20220209T234336_Cam0	6	-31.0744
deltaCurvature-degpermm on	ΔCurvature on (deg/mm)	SS87279	20220209T234336_Cam1	6	-19.7159
deltaCurvature-degpermm on	ΔCurvature on (deg/mm)	SS87279	20220413T134445_Cam0	6	5.98962
deltaCurvature-degpermm on	ΔCurvature on (deg/mm)	SS87279	20220413T134445_Cam1	6	-10.1031
deltaCurvature-degpermm on	ΔCurvature on (deg/mm)	SS87279	20220413T135041_Cam0	6	7.18419
deltaCurvature-degpermm on	ΔCurvature on (deg/mm)	SS87279	20220413T135041_Cam1	6	0.992057
deltaCurvature-degpermm on	ΔCurvature on (deg/mm)	SS87279	20220418T173434_Cam0	6	-24.5644
deltaCurvature-degpermm on	ΔCurvature on (deg/mm)	SS87279	20220418T173434_Cam1	6	-21.8401
deltaCurvature-degpermm on	ΔCurvature on (deg/mm)	SS87279	20220420T141130_Cam0	6	7.58204
deltaCurvature-degpermm on	ΔCurvature on (deg/mm)	SS87279	20220420T141130_Cam1	6	-1.39419
deltaCurvature-degpermm on	ΔCurvature on (deg/mm)	SS87279	20220113T142147_Cam1	4	-31.1191
deltaCurvature-degpermm off	ΔCurvature off (deg/mm)	Empty-split	20191216T223344_Cam0	6	-4.37686
deltaCurvature-degpermm off	ΔCurvature off (deg/mm)	Empty-split	20191216T223344_Cam1	6	1.12179
deltaCurvature-degpermm off	ΔCurvature off (deg/mm)	Empty-split	20200225T140759_Cam0	6	2.66328
deltaCurvature-degpermm off	ΔCurvature off (deg/mm)	Empty-split	20200225T140759_Cam1	6	5.36086
deltaCurvature-degpermm off	ΔCurvature off (deg/mm)	Empty-split	20200225T142841_Cam0	6	-10.6047
deltaCurvature-degpermm off	ΔCurvature off (deg/mm)	Empty-split	20200225T142841_Cam1	6	-2.25631
deltaCurvature-degpermm off	ΔCurvature off (deg/mm)	Empty-split	20200227T114833_Cam0	6	-1.12802
deltaCurvature-degpermm off	ΔCurvature off (deg/mm)	Empty-split	20200227T114833_Cam1	6	0.922543
deltaCurvature-degpermm off	ΔCurvature off (deg/mm)	Empty-split	20200227T122542_Cam0	6	1.9616
deltaCurvature-degpermm off	ΔCurvature off (deg/mm)	Empty-split	20200227T122542_Cam1	6	7.94573
deltaCurvature-degpermm off	ΔCurvature off (deg/mm)	Empty-split	20191210T171446_Cam0	6	7.45236
deltaCurvature-degpermm off	ΔCurvature off (deg/mm)	Empty-split	20191210T171446_Cam1	6	6.11039
deltaCurvature-degpermm off	ΔCurvature off (deg/mm)	Empty-split	20191216T223759_Cam0	6	-4.00384
deltaCurvature-degpermm off	ΔCurvature off (deg/mm)	Empty-split	20191216T223759_Cam1	6	-7.0636
deltaCurvature-degpermm off	ΔCurvature off (deg/mm)	Empty-split	20200225T141140_Cam0	6	2.33718
deltaCurvature-degpermm off	ΔCurvature off (deg/mm)	Empty-split	20200225T141140_Cam1	6	-0.170703
deltaCurvature-degpermm off	ΔCurvature off (deg/mm)	Empty-split	20200225T143219_Cam0	6	-1.64249
deltaCurvature-degpermm off	ΔCurvature off (deg/mm)	Empty-split	20200225T143219_Cam1	6	-0.72824
deltaCurvature-degpermm off	ΔCurvature off (deg/mm)	Empty-split	20200227T114836_Cam0	6	-0.574734
deltaCurvature-degpermm off	ΔCurvature off (deg/mm)	Empty-split	20200227T114836_Cam1	6	0.0946592
deltaCurvature-degpermm off	ΔCurvature off (deg/mm)	Empty-split	20200227T122617_Cam0	6	7.1261
deltaCurvature-degpermm off	ΔCurvature off (deg/mm)	Empty-split	20200227T122617_Cam1	6	0.112608
deltaCurvature-degpermm off	ΔCurvature off (deg/mm)	Gr64fGAL4	20220209T225213_Cam0	6	46.8121
deltaCurvature-degpermm off	ΔCurvature off (deg/mm)	Gr64fGAL4	20220209T225213_Cam1	6	48.0701
deltaCurvature-degpermm off	ΔCurvature off (deg/mm)	Gr64fGAL4	20220209T225450_Cam0	6	37.9581
deltaCurvature-degpermm off	ΔCurvature off (deg/mm)	Gr64fGAL4	20220209T225450_Cam1	6	45.4522
deltaCurvature-degpermm off	ΔCurvature off (deg/mm)	Gr64fGAL4	20220209T230847_Cam0	6	32.5002
deltaCurvature-degpermm off	ΔCurvature off (deg/mm)	Gr64fGAL4	20220209T230847_Cam1	6	43.9974
deltaCurvature-degpermm off	ΔCurvature off (deg/mm)	Gr64fGAL4	20220209T231314_Cam0	6	39.4169
deltaCurvature-degpermm off	ΔCurvature off (deg/mm)	Gr64fGAL4	20220209T231314_Cam1	6	45.5968
deltaCurvature-degpermm off	ΔCurvature off (deg/mm)	Gr64fGAL4	20220210T020041_Cam0	6	33.9573
deltaCurvature-degpermm off	ΔCurvature off (deg/mm)	Gr64fGAL4	20220210T020041_Cam1	6	39.6741
deltaCurvature-degpermm off	ΔCurvature off (deg/mm)	Gr64fGAL4	20220210T020507_Cam0	6	38.9441
deltaCurvature-degpermm off	ΔCurvature off (deg/mm)	Gr64fGAL4	20220210T020507_Cam1	6	28.6976
deltaCurvature-degpermm off	ΔCurvature off (deg/mm)	SS87269	20220113T184856_Cam1	6	36.7014
deltaCurvature-degpermm off	ΔCurvature off (deg/mm)	SS87269	20220113T185438_Cam0	6	31.7753
deltaCurvature-degpermm off	ΔCurvature off (deg/mm)	SS87269	20220113T192814_Cam0	6	67.0852
deltaCurvature-degpermm off	ΔCurvature off (deg/mm)	SS87269	20220113T192814_Cam1	6	40.779
deltaCurvature-degpermm off	ΔCurvature off (deg/mm)	SS87269	20220113T193343_Cam0	6	47.2468
deltaCurvature-degpermm off	ΔCurvature off (deg/mm)	SS87269	20220113T193343_Cam1	6	59.3682
deltaCurvature-degpermm off	ΔCurvature off (deg/mm)	SS87269	20220210T002055_Cam0	6	46.1323
deltaCurvature-degpermm off	ΔCurvature off (deg/mm)	SS87269	20220210T002055_Cam1	6	36.7825
deltaCurvature-degpermm off	ΔCurvature off (deg/mm)	SS87269	20220210T002715_Cam0	6	21.8536
deltaCurvature-degpermm off	ΔCurvature off (deg/mm)	SS87269	20220210T002715_Cam1	6	39.665
deltaCurvature-degpermm off	ΔCurvature off (deg/mm)	SS87269	20220413T175914_Cam0	6	37.2694
deltaCurvature-degpermm off	ΔCurvature off (deg/mm)	SS87269	20220413T175914_Cam1	6	30.4665
deltaCurvature-degpermm off	ΔCurvature off (deg/mm)	SS87269	20220413T180752_Cam0	6	26.7647
deltaCurvature-degpermm off	ΔCurvature off (deg/mm)	SS87269	20220413T180752_Cam1	6	31.7192
deltaCurvature-degpermm off	ΔCurvature off (deg/mm)	SS87269	20220413T181637_Cam0	6	37.4255
deltaCurvature-degpermm off	ΔCurvature off (deg/mm)	SS87269	20220413T181637_Cam1	6	30.9079
deltaCurvature-degpermm off	ΔCurvature off (deg/mm)	SS87269	20220413T182546_Cam0	6	33.1795
deltaCurvature-degpermm off	ΔCurvature off (deg/mm)	SS87269	20220413T182546_Cam1	6	32.6693
deltaCurvature-degpermm off	ΔCurvature off (deg/mm)	SS87269	20220113T184856_Cam0	5	25.0451
deltaCurvature-degpermm off	ΔCurvature off (deg/mm)	SS87269	20220113T185438_Cam1	5	44.1603
deltaCurvature-degpermm off	ΔCurvature off (deg/mm)	SS88801	20220413T170242_Cam0	6	36.8447
deltaCurvature-degpermm off	ΔCurvature off (deg/mm)	SS88801	20220413T170242_Cam1	6	36.9309
deltaCurvature-degpermm off	ΔCurvature off (deg/mm)	SS88801	20220413T170832_Cam0	5	47.523
deltaCurvature-degpermm off	ΔCurvature off (deg/mm)	SS88801	20220413T170832_Cam1	6	35.0092
deltaCurvature-degpermm off	ΔCurvature off (deg/mm)	SS88801	20220413T172653_Cam0	6	26.5043
deltaCurvature-degpermm off	ΔCurvature off (deg/mm)	SS88801	20220413T172653_Cam1	6	7.38134
deltaCurvature-degpermm off	ΔCurvature off (deg/mm)	SS88801	20220418T183701_Cam1	6	16.1992
deltaCurvature-degpermm off	ΔCurvature off (deg/mm)	SS88801	20220418T191532_Cam0	5	13.6469
deltaCurvature-degpermm off	ΔCurvature off (deg/mm)	SS88801	20220418T191532_Cam1	6	14.8231
deltaCurvature-degpermm off	ΔCurvature off (deg/mm)	SS88801	20220418T192443_Cam0	6	10.8535
deltaCurvature-degpermm off	ΔCurvature off (deg/mm)	SS88801	20220418T192443_Cam1	6	7.28732
deltaCurvature-degpermm off	ΔCurvature off (deg/mm)	SS88801	20220420T145534_Cam0	6	6.65239
deltaCurvature-degpermm off	ΔCurvature off (deg/mm)	SS88801	20220420T145534_Cam1	6	13.3517
deltaCurvature-degpermm off	ΔCurvature off (deg/mm)	SS88801	20220420T150421_Cam0	6	17.5743
deltaCurvature-degpermm off	ΔCurvature off (deg/mm)	SS88801	20220420T150421_Cam1	6	9.11583
deltaCurvature-degpermm off	ΔCurvature off (deg/mm)	SS88801	20220420T152841_Cam0	6	9.83427
deltaCurvature-degpermm off	ΔCurvature off (deg/mm)	SS88801	20220420T152841_Cam1	6	8.74436
deltaCurvature-degpermm off	ΔCurvature off (deg/mm)	SS88801	20220420T153601_Cam0	6	17.2127
deltaCurvature-degpermm off	ΔCurvature off (deg/mm)	SS88801	20220420T153601_Cam1	6	21.3744
deltaCurvature-degpermm off	ΔCurvature off (deg/mm)	SS88801	20220418T183701_Cam0	5	11.1038
deltaCurvature-degpermm off	ΔCurvature off (deg/mm)	SS88776	20220413T173639_Cam0	6	36.9244
deltaCurvature-degpermm off	ΔCurvature off (deg/mm)	SS88776	20220413T173639_Cam1	6	40.0776
deltaCurvature-degpermm off	ΔCurvature off (deg/mm)	SS88776	20220413T174404_Cam0	6	33.1062
deltaCurvature-degpermm off	ΔCurvature off (deg/mm)	SS88776	20220413T174404_Cam1	6	28.729
deltaCurvature-degpermm off	ΔCurvature off (deg/mm)	SS88776	20220413T175259_Cam0	6	24.2961
deltaCurvature-degpermm off	ΔCurvature off (deg/mm)	SS88776	20220413T175259_Cam1	6	24.0704
deltaCurvature-degpermm off	ΔCurvature off (deg/mm)	SS88776	20220418T193117_Cam0	6	9.61647
deltaCurvature-degpermm off	ΔCurvature off (deg/mm)	SS88776	20220418T193117_Cam1	6	27.3724
deltaCurvature-degpermm off	ΔCurvature off (deg/mm)	SS88776	20220418T193945_Cam0	6	19.8146
deltaCurvature-degpermm off	ΔCurvature off (deg/mm)	SS88776	20220418T193945_Cam1	6	26.3378
deltaCurvature-degpermm off	ΔCurvature off (deg/mm)	SS88776	20220418T195311_Cam0	6	31.8759
deltaCurvature-degpermm off	ΔCurvature off (deg/mm)	SS88776	20220418T195311_Cam1	6	32.2084
deltaCurvature-degpermm off	ΔCurvature off (deg/mm)	SS88776	20220418T195851_Cam0	6	32.4749
deltaCurvature-degpermm off	ΔCurvature off (deg/mm)	SS88776	20220418T195851_Cam1	6	19.7072
deltaCurvature-degpermm off	ΔCurvature off (deg/mm)	SS88776	20220420T161714_Cam0	6	33.0505
deltaCurvature-degpermm off	ΔCurvature off (deg/mm)	SS88776	20220420T161714_Cam1	6	20.5445
deltaCurvature-degpermm off	ΔCurvature off (deg/mm)	SS88776	20220420T162326_Cam0	6	21.4353
deltaCurvature-degpermm off	ΔCurvature off (deg/mm)	SS88776	20220420T162326_Cam1	6	25.0164
deltaCurvature-degpermm off	ΔCurvature off (deg/mm)	SS88776	20220420T164829_Cam0	6	22.2969
deltaCurvature-degpermm off	ΔCurvature off (deg/mm)	SS88776	20220420T164829_Cam1	6	21.0662
deltaCurvature-degpermm off	ΔCurvature off (deg/mm)	SS88776	20220420T165428_Cam0	6	27.1248
deltaCurvature-degpermm off	ΔCurvature off (deg/mm)	SS88776	20220420T165428_Cam1	6	14.2808
deltaCurvature-degpermm off	ΔCurvature off (deg/mm)	SS87272	20220113T153036_Cam0	5	34.6082
deltaCurvature-degpermm off	ΔCurvature off (deg/mm)	SS87272	20220113T153036_Cam1	6	75.745
deltaCurvature-degpermm off	ΔCurvature off (deg/mm)	SS87272	20220113T153319_Cam0	6	12.9126
deltaCurvature-degpermm off	ΔCurvature off (deg/mm)	SS87272	20220113T153319_Cam1	6	8.29826
deltaCurvature-degpermm off	ΔCurvature off (deg/mm)	SS87272	20220113T160703_Cam0	6	29.4924
deltaCurvature-degpermm off	ΔCurvature off (deg/mm)	SS87272	20220113T160703_Cam1	6	16.6679
deltaCurvature-degpermm off	ΔCurvature off (deg/mm)	SS87272	20220113T161231_Cam0	6	10.3357
deltaCurvature-degpermm off	ΔCurvature off (deg/mm)	SS87272	20220113T161231_Cam1	6	8.35121
deltaCurvature-degpermm off	ΔCurvature off (deg/mm)	SS87272	20220209T235205_Cam0	6	9.46722
deltaCurvature-degpermm off	ΔCurvature off (deg/mm)	SS87272	20220209T235205_Cam1	6	3.5985
deltaCurvature-degpermm off	ΔCurvature off (deg/mm)	SS87272	20220209T235755_Cam0	6	12.1645
deltaCurvature-degpermm off	ΔCurvature off (deg/mm)	SS87272	20220209T235755_Cam1	6	12.2588
deltaCurvature-degpermm off	ΔCurvature off (deg/mm)	SS87272	20220413T125325_Cam0	6	17.6357
deltaCurvature-degpermm off	ΔCurvature off (deg/mm)	SS87272	20220413T125325_Cam1	6	17.5223
deltaCurvature-degpermm off	ΔCurvature off (deg/mm)	SS87272	20220413T130126_Cam0	6	18.8888
deltaCurvature-degpermm off	ΔCurvature off (deg/mm)	SS87272	20220413T130126_Cam1	6	20.054
deltaCurvature-degpermm off	ΔCurvature off (deg/mm)	SS87272	20220413T153517_Cam0	6	4.92646
deltaCurvature-degpermm off	ΔCurvature off (deg/mm)	SS87272	20220413T153517_Cam1	6	1.18948
deltaCurvature-degpermm off	ΔCurvature off (deg/mm)	SS87272	20220418T171819_Cam0	6	10.5849
deltaCurvature-degpermm off	ΔCurvature off (deg/mm)	SS87272	20220418T171819_Cam1	6	19.3274
deltaCurvature-degpermm off	ΔCurvature off (deg/mm)	SS87272	20220418T171828_Cam1	6	5.42265
deltaCurvature-degpermm off	ΔCurvature off (deg/mm)	SS87272	20220420T134623_Cam0	6	9.1961
deltaCurvature-degpermm off	ΔCurvature off (deg/mm)	SS87272	20220420T134623_Cam1	6	5.10285
deltaCurvature-degpermm off	ΔCurvature off (deg/mm)	SS87272	20220420T135655_Cam0	6	-1.32607
deltaCurvature-degpermm off	ΔCurvature off (deg/mm)	SS87272	20220420T135655_Cam1	6	2.95252
deltaCurvature-degpermm off	ΔCurvature off (deg/mm)	SS87278	20220113T114750_Cam0	6	-2.97726
deltaCurvature-degpermm off	ΔCurvature off (deg/mm)	SS87278	20220113T114750_Cam1	6	32.9834
deltaCurvature-degpermm off	ΔCurvature off (deg/mm)	SS87278	20220113T115217_Cam0	6	7.2297
deltaCurvature-degpermm off	ΔCurvature off (deg/mm)	SS87278	20220113T115217_Cam1	6	7.91417
deltaCurvature-degpermm off	ΔCurvature off (deg/mm)	SS87278	20220114T175455_Cam0	6	8.20654
deltaCurvature-degpermm off	ΔCurvature off (deg/mm)	SS87278	20220114T175455_Cam1	6	-0.715866
deltaCurvature-degpermm off	ΔCurvature off (deg/mm)	SS87278	20220209T232417_Cam0	6	5.84318
deltaCurvature-degpermm off	ΔCurvature off (deg/mm)	SS87278	20220209T232417_Cam1	6	6.27631
deltaCurvature-degpermm off	ΔCurvature off (deg/mm)	SS87278	20220209T233043_Cam0	6	-5.68463
deltaCurvature-degpermm off	ΔCurvature off (deg/mm)	SS87278	20220209T233043_Cam1	6	-5.25692
deltaCurvature-degpermm off	ΔCurvature off (deg/mm)	SS87278	20220413T131727_Cam0	6	13.595
deltaCurvature-degpermm off	ΔCurvature off (deg/mm)	SS87278	20220413T131727_Cam1	6	12.912
deltaCurvature-degpermm off	ΔCurvature off (deg/mm)	SS87278	20220413T132321_Cam0	6	15.4751
deltaCurvature-degpermm off	ΔCurvature off (deg/mm)	SS87278	20220413T132321_Cam1	6	9.73363
deltaCurvature-degpermm off	ΔCurvature off (deg/mm)	SS87278	20220418T173342_Cam0	5	6.90968
deltaCurvature-degpermm off	ΔCurvature off (deg/mm)	SS87278	20220420T140034_Cam1	6	14.7689
deltaCurvature-degpermm off	ΔCurvature off (deg/mm)	SS87278	20220418T173342_Cam1	5	3.60478
deltaCurvature-degpermm off	ΔCurvature off (deg/mm)	SS87279	20220113T141611_Cam0	6	32.0862
deltaCurvature-degpermm off	ΔCurvature off (deg/mm)	SS87279	20220113T141611_Cam1	6	10.3544
deltaCurvature-degpermm off	ΔCurvature off (deg/mm)	SS87279	20220113T142147_Cam0	6	-5.63814
deltaCurvature-degpermm off	ΔCurvature off (deg/mm)	SS87279	20220113T145041_Cam0	6	18.2841
deltaCurvature-degpermm off	ΔCurvature off (deg/mm)	SS87279	20220113T145041_Cam1	6	NaN
deltaCurvature-degpermm off	ΔCurvature off (deg/mm)	SS87279	20220113T145515_Cam0	6	28.3042
deltaCurvature-degpermm off	ΔCurvature off (deg/mm)	SS87279	20220113T145515_Cam1	6	9.45321
deltaCurvature-degpermm off	ΔCurvature off (deg/mm)	SS87279	20220209T233918_Cam0	6	15.2967
deltaCurvature-degpermm off	ΔCurvature off (deg/mm)	SS87279	20220209T233918_Cam1	6	18.2597
deltaCurvature-degpermm off	ΔCurvature off (deg/mm)	SS87279	20220209T234336_Cam0	6	-1.6569
deltaCurvature-degpermm off	ΔCurvature off (deg/mm)	SS87279	20220209T234336_Cam1	6	4.54669
deltaCurvature-degpermm off	ΔCurvature off (deg/mm)	SS87279	20220413T134445_Cam0	6	32.1898
deltaCurvature-degpermm off	ΔCurvature off (deg/mm)	SS87279	20220413T134445_Cam1	6	52.1106
deltaCurvature-degpermm off	ΔCurvature off (deg/mm)	SS87279	20220413T135041_Cam0	6	5.06616
deltaCurvature-degpermm off	ΔCurvature off (deg/mm)	SS87279	20220413T135041_Cam1	6	20.5505
deltaCurvature-degpermm off	ΔCurvature off (deg/mm)	SS87279	20220418T173434_Cam0	6	15.6026
deltaCurvature-degpermm off	ΔCurvature off (deg/mm)	SS87279	20220418T173434_Cam1	6	18.3194
deltaCurvature-degpermm off	ΔCurvature off (deg/mm)	SS87279	20220420T141130_Cam0	6	23.2987
deltaCurvature-degpermm off	ΔCurvature off (deg/mm)	SS87279	20220420T141130_Cam1	6	31.267
deltaCurvature-degpermm off	ΔCurvature off (deg/mm)	SS87279	20220113T142147_Cam1	4	35.1414
