# Supplementary material for: Driver lines for studying associative learning in Drosophila
Source: eLife. 2025 Jan 29;13:RP94168. doi: 10.7554/eLife.94168 (PMC11778931; doi:10.7554/eLife.94168)
Supplement: Figure 8—source data 1. [file elife-94168-fig8-data1.xlsx]

## Sheet: Figure8E
Memory (PI)
SS87269_Test1	SS87269_Test2	SS87269_Test3	SS88801_Test1	SS88801_Test2	SS88801_Test3	SS88776_Test1	SS88776_Test2	SS88776_Test3	SS87272_Test1	SS87272_Test2	SS87272_Test3	SS87279_Test1	SS87279_Test2	SS87279_Test3	SS87278_Test1	SS87278_Test2	SS87278_Test3
0.626198	0.584821	0.726548	0.795209	0.582267	0.516671	0.455355	0.378303	0.09514	0.46365	0.423366	0.00899794	0.122038	-0.209397	-0.29236	0.214938	0.364287	-0.221381
0.714726	0.650181	0.769871	0.757978	0.295096	0.479463	0.732633	0.452361	0.156548	0.410461	0.285114	-0.0169221	0.330329	0.0452759	-0.227779	-0.0135395	0.28485	0.265461
0.593398	0.860986	0.724246	0.334028	0.192584	0.303956	0.638249	0.777753	0.50263	0.284637	0.0627525	-0.311311	0.156052	0.181795	0.099556	-0.118739	0.199133	-0.325748
0.826569	0.741635	0.483554	0.477328	0.615057	0.587996	0.703891	0.565271	0.488451	0.339844	0.0193983	0.395436	-0.430759	-0.340379	0.184504	0.177341	-0.211056	0.101664
0.636475	0.508602	0.535128	0.492621	0.223277	-0.217698				0.212597	-0.0706887	-0.105657	0.358949	-0.0439528	0.15	-0.310778	-0.46289	-0.337061
0.921652	0.869367	0.603448	0.681092	0.334578	0.180056				0.392938	0.483443	0.244581	0.208208	-0.0593823	-0.320491	0.46161	0.417093
0.78613	0.608596	0.763054	0.774852	0.311129	-0.007971				0.444152	0.0144152	0.254543	0.265058	-0.268553	-0.166667	-0.0919482	-0.0119257
0.847913	0.756144	0.666402	0.71756	0.478912	0.216185				0.53111	0.479677		0.318809	0.171281		0.226945	0.355174
0.564938	0.692669	0.722037							0.477676	0.259173		0.43228	-0.113282		0.0303369	0.107814
0.656652	0.84615	0.858121							0.270466	0.189749		0.158607	0.0545812
0.751598	0.923853	0.683629							0.315598	0.24695		0.157292	-0.0127394
0.664461	0.696141	0.600329
0.87412	0.799264	0.751882
0.681919	0.517397	0.669884
0.592295	0.781328	0.72327

## Sheet: Figure8F
			time_1	time_2	time_3	time_4	time_5	time_6	time_7	time_8	time_9	time_10	time_11	time_12	time_13	time_14	time_15	time_16	time_17	time_18	time_19	time_20	time_21	time_22	time_23	time_24	time_25	time_26	time_27	time_28	time_29	time_30	time_31	time_32	time_33	time_34	time_35	time_36	time_37	time_38	time_39	time_40	time_41	time_42	time_43	time_44	time_45	time_46	time_47
		Time (s)	0	0.333333	0.666667	1	1.33333	1.66667	2	2.33333	2.66667	3	3.33333	3.66667	4	4.33333	4.66667	5	5.33333	5.66667	6	6.33333	6.66667	7	7.33333	7.66667	8	8.33333	8.66667	9	9.33333	9.66667	10	10.3333	10.6667	11	11.3333	11.6667	12	12.3333	12.6667	13	13.3333	13.6667	14	14.3333	14.6667	15	15.3333
			Mean
Data_Type	Male	GroupCount	mean_1	mean_2	mean_3	mean_4	mean_5	mean_6	mean_7	mean_8	mean_9	mean_10	mean_11	mean_12	mean_13	mean_14	mean_15	mean_16	mean_17	mean_18	mean_19	mean_20	mean_21	mean_22	mean_23	mean_24	mean_25	mean_26	mean_27	mean_28	mean_29	mean_30	mean_31	mean_32	mean_33	mean_34	mean_35	mean_36	mean_37	mean_38	mean_39	mean_40	mean_41	mean_42	mean_43	mean_44	mean_45	mean_46	mean_47
P return (revisit-10mmOut3mmIn-15s)	Empty-split	22	0.140206	0.145442	0.147096	0.148335	0.14729	0.144298	0.143333	0.142133	0.141418	0.139776	0.14421	0.145465	0.142628	0.140189	0.143676	0.138133	0.139644	0.135992	0.135621	0.136398	0.141595	0.146527	0.147827	0.146608	0.145876	0.146662	0.143383	0.144261	0.151458	0.149142	0.147671	0.147532	0.142274	0.141752	0.149088	0.145349	0.145484	0.150725	0.147908	0.15488	0.164788	0.160272	0.156942	0.149113	0.141654	0.145464	0.146251
P return (revisit-10mmOut3mmIn-15s)	Gr64fGAL4	12	0.0383076	0.0353011	0.0350969	0.0345851	0.0326411	0.03178	0.0301033	0.0314878	0.0292989	0.0277432	0.026993	0.022542	0.0189722	0.0238313	0.0233576	0.0241336	0.0181397	0.0153998	0.0133087	0.0112072	0.00964097	0.00824517	0.0107502	0.0128576	0.0137885	0.0132701	0.0150733	0.0163306	0.0175818	0.0145883	0.0150546	0.0153141	0.0174382	0.0197126	0.0233048	0.0271933	0.0289996	0.0326694	0.0364609	0.0375514	0.0394084	0.0391263	0.0388442	0.0387861	0.0383632	0.0420334	0.0422716
P return (revisit-10mmOut3mmIn-15s)	SS87269	20	0.0741924	0.0777829	0.0744481	0.0737889	0.0646467	0.0568717	0.0509937	0.0486371	0.0457991	0.0447194	0.0410178	0.0420376	0.0427123	0.0361599	0.0293109	0.0281267	0.0307673	0.0312265	0.0247278	0.0249352	0.026319	0.0261654	0.0226391	0.0253763	0.024894	0.0298307	0.0376549	0.0458351	0.0542863	0.0513364	0.0540109	0.0590305	0.0614315	0.063117	0.0642802	0.0701807	0.072023	0.0832239	0.092076	0.0978354	0.107177	0.113345	0.115163	0.117714	0.122944	0.127873	0.134724
P return (revisit-10mmOut3mmIn-15s)	SS88801	20	0.0581622	0.0582318	0.0570192	0.0523975	0.052118	0.0510282	0.0480642	0.0488401	0.0478528	0.0478816	0.044452	0.0443678	0.05065	0.0472917	0.04395	0.0492912	0.053438	0.0540171	0.0539682	0.0557975	0.0566776	0.0545655	0.0550409	0.0602825	0.0668898	0.0655344	0.0671251	0.0687449	0.070715	0.0653783	0.0620303	0.0645777	0.0674538	0.0707922	0.0791912	0.0820198	0.0837826	0.0871209	0.0889989	0.0891499	0.0925602	0.0940683	0.0989621	0.0962305	0.0999642	0.1036	0.10008
P return (revisit-10mmOut3mmIn-15s)	SS88776	22	0.0619009	0.0608524	0.0563443	0.058399	0.0557773	0.0555626	0.0522071	0.0499187	0.0483424	0.050045	0.0535559	0.0498495	0.0435617	0.0435673	0.0464424	0.044798	0.0440031	0.045115	0.0413993	0.0414091	0.0413792	0.0435102	0.0465467	0.0459711	0.0472406	0.0491985	0.0543997	0.0598962	0.0624273	0.0613925	0.0669105	0.0719579	0.0760143	0.080689	0.0842197	0.0853956	0.0913578	0.0925717	0.0932887	0.0995607	0.103028	0.104587	0.107865	0.114318	0.115291	0.116393	0.11808
P return (revisit-10mmOut3mmIn-15s)	SS87272	25	0.0477928	0.0506937	0.0480311	0.0484436	0.0482125	0.0528447	0.0510507	0.0476542	0.051075	0.056443	0.0564463	0.0582803	0.0604827	0.0671116	0.0676216	0.074764	0.0742853	0.0759412	0.0779944	0.0773623	0.0763492	0.074391	0.0762069	0.0752836	0.0810001	0.0869028	0.090891	0.0854339	0.0832684	0.0881687	0.0791466	0.0800253	0.0826386	0.0843997	0.0903991	0.0938155	0.0943897	0.0994317	0.0981416	0.0964106	0.0999103	0.102381	0.102114	0.10112	0.101659	0.100812	0.0964319
P return (revisit-10mmOut3mmIn-15s)	SS87279	20	0.0701294	0.0677741	0.073888	0.0765709	0.0757706	0.0773237	0.074653	0.0659479	0.0683768	0.0712954	0.0697541	0.072691	0.0820882	0.0823675	0.0768198	0.0781644	0.073515	0.0770143	0.0735076	0.0746302	0.0755113	0.0749735	0.0728721	0.0749125	0.0802003	0.076677	0.0717328	0.0702837	0.0761015	0.0774191	0.0775677	0.0778224	0.0710167	0.0697936	0.0731641	0.0747101	0.0768249	0.0781586	0.0745086	0.0721941	0.0701501	0.0730253	0.0696449	0.0597975	0.0572717	0.0526508	0.0470298
P return (revisit-10mmOut3mmIn-15s)	SS87278	17	0.0944472	0.0971756	0.0953144	0.0967479	0.101649	0.102238	0.10635	0.108707	0.106791	0.108803	0.116882	0.116961	0.120834	0.129984	0.130254	0.138187	0.142131	0.139139	0.144733	0.137752	0.132075	0.139138	0.136257	0.137298	0.145967	0.143352	0.144493	0.141772	0.130788	0.120288	0.122748	0.119669	0.116909	0.111942	0.108327	0.101008	0.10167	0.0974339	0.0871284	0.076166	0.0784492	0.07388	0.0754767	0.070107	0.0671361	0.0726962	0.0723136
ΔSpeed (deltaSpeed-mmpersec)	Empty-split	22	-0.173092	-0.00220906	0.0358573	0.0166975	0.00373686	0.0365424	0.0324641	-0.0188731	-0.0167284	0.00867272	-0.00942261	-0.0189865	-0.0163222	-0.0130956	-0.0146577	0.00193673	-0.0179627	-0.026779	-0.0139651	-0.0450213	-0.00940916	0.0287437	0.0461926	0.0512196	0.0447524	0.0228332	-0.0116186	0.000536408	0.0779578	0.0345255	0.250469	0.541835	0.788995	0.886581	0.770148	0.645577	0.537997	0.441573	0.411889	0.322027	0.298268	0.312711	0.287786	0.287119	0.30651	0.283773	0.299101
ΔSpeed (deltaSpeed-mmpersec)	Gr64fGAL4	12	-0.114675	-0.00145353	0.0196251	-0.0258616	-0.0210638	0.00164239	-0.0513993	-0.0167702	-0.00941819	-0.0179575	-0.0130087	0.0332621	0.0320163	-0.0268353	0.0335385	0.00150033	0.0210397	0.0106145	0.022606	0.0378795	0.0376232	0.0256144	0.0252108	0.004154	-0.0139592	-0.00949325	0.0152478	-0.00158047	0.00190178	0.0364494	-0.131023	-0.543597	-0.697459	-0.711267	-0.734005	-0.758366	-0.771437	-0.765797	-0.742386	-0.714353	-0.691498	-0.678212	-0.655016	-0.625347	-0.62373	-0.607918	-0.571763
ΔSpeed (deltaSpeed-mmpersec)	SS87269	20	-0.148637	0.0341033	-0.0177487	0.0851458	0.0586408	0.0642433	0.103289	0.0633059	0.0536709	0.0266209	0.0625908	-0.0113453	-0.0443601	-0.0108345	0.0134403	0.0245286	0.0612156	0.0102697	-0.048297	-0.0629243	-0.103946	-0.062104	-0.0211895	-0.0262016	0.0341514	-0.0226037	-0.0746323	-0.00169053	-0.0387015	-0.0597494	-0.438708	-1.17975	-1.33738	-1.33359	-1.39156	-1.41753	-1.42298	-1.44476	-1.45493	-1.4523	-1.43626	-1.42179	-1.39242	-1.37388	-1.33842	-1.29883	-1.25792
ΔSpeed (deltaSpeed-mmpersec)	SS88801	20	-0.156044	0.0497831	0.0405255	0.0713604	0.0353405	0.026542	0.0639391	0.041161	-9.68908e-05	-0.0342312	-0.0201601	-0.0309035	-0.0725355	-0.0280145	-0.0100965	-0.0392835	-0.0440682	-0.0534034	0.00352423	-0.0198409	-0.057429	-0.0529911	-0.0165727	0.0166428	0.0333834	0.0465138	0.0619232	0.0474834	0.0975484	0.103262	-0.166728	-0.978299	-1.26067	-1.26767	-1.31299	-1.32425	-1.32992	-1.33266	-1.32111	-1.30831	-1.24939	-1.17042	-1.11181	-1.02724	-0.924601	-0.800184	-0.757709
ΔSpeed (deltaSpeed-mmpersec)	SS88776	22	-0.176504	0.00571889	-0.00322739	-0.0351973	-0.0182813	-0.0153093	-0.0440463	-0.015489	-0.0516184	0.0187461	0.034909	-0.00149668	0.00138418	0.050494	0.0737445	0.0218741	0.0629282	0.00268491	-0.00137638	-0.000485683	0.0357782	0.0272615	-0.0277179	-0.00447699	0.0125588	0.0188987	0.00704917	0.0145489	0.00664782	-0.00274846	-0.383208	-1.11461	-1.35001	-1.35475	-1.34408	-1.357	-1.36898	-1.37199	-1.36151	-1.32552	-1.27083	-1.23643	-1.16348	-1.08462	-0.996812	-0.941412	-0.85842
ΔSpeed (deltaSpeed-mmpersec)	SS87272	25	-0.115589	0.0590053	0.0533484	0.0322567	0.026324	0.00244101	0.0124843	-0.00792378	-0.0132801	-0.0183303	0.0215736	0.0324417	0.0437812	-0.0196255	-0.0338779	0.0129382	-0.0357588	-0.01214	-0.0487176	0.0209479	0.0123603	-0.00729522	-0.0273219	-0.0439498	-0.0519559	-0.0161074	0.0400156	0.0527893	0.0291655	-0.011472	-0.0827937	-0.5192	-0.82126	-0.835189	-0.813959	-0.767952	-0.682423	-0.550507	-0.397317	-0.258577	-0.144808	-0.06213	0.0419037	0.132232	0.196831	0.275695	0.275918
ΔSpeed (deltaSpeed-mmpersec)	SS87279	20	-0.0841495	-0.0160752	-0.0280648	0.00342279	0.0520887	0.0183124	0.0233199	0.0400838	-0.00517047	0.0280163	0.032182	0.0223199	-0.00818789	0.000178098	0.0422089	-0.00700984	-0.0457442	-0.00163187	0.0281788	0.0323102	-0.0314374	-0.0103442	0.00810233	-0.0286239	-0.0385778	-0.0288724	-0.011992	-0.0196236	0.0347809	0.0335418	0.223856	0.756727	1.02976	1.13591	1.17641	1.14482	1.16522	1.17124	1.18105	1.16325	1.14692	1.22715	1.24889	1.26251	1.25945	1.25224	1.28813
ΔSpeed (deltaSpeed-mmpersec)	SS87278	17	-0.11329	0.0119506	-0.026572	0.00904502	0.0250014	0.0356527	0.0255008	-0.000119335	0.00686035	0.0303508	0.0321343	0.0780614	0.0176208	0.0455773	0.0177083	-0.0111796	-0.0203566	-0.00866474	-0.0105309	-0.0184867	-0.0104072	0.0337695	0.0289447	-0.037534	0.00984496	0.000928254	-0.051345	-0.0197153	-0.0807496	-0.0264088	-0.218483	-0.646514	-0.0865763	0.689229	0.735023	0.711221	0.661091	0.559585	0.600939	0.553609	0.544618	0.554245	0.494352	0.540621	0.453754	0.403395	0.42182
ΔCurvature (deltaCurvature-degpermm)	Empty-split	22	6.88271	-1.37245	-0.817799	-2.20231	-0.366889	-1.95279	-0.424046	0.335612	-0.146046	0.144548	-0.123393	-0.710557	0.90275	0.998037	1.24343	-0.248348	-0.689515	1.22064	-0.34718	1.71429	-0.162637	0.227157	-0.194775	-0.605083	-0.887502	-0.468937	-0.171657	0.59929	-2.59852	-0.50718	9.18175	16.4178	-0.477533	-8.5646	-8.46949	-10.1565	-8.94396	-5.40348	-5.24425	-5.37731	-5.98006	-7.28701	-8.37198	-5.97155	-8.34882	-7.46212	-8.65186
ΔCurvature (deltaCurvature-degpermm)	Gr64fGAL4	12	26.752	-1.35044	-1.30062	-0.280381	0.170599	-2.20879	-0.0768089	-2.33188	-3.62982	0.0265413	2.62798	-1.68444	-1.19781	0.161141	-5.58194	0.335033	-0.59638	1.82021	0.129856	-1.90943	-2.39779	0.0095308	-0.98764	0.389402	-0.694904	0.214814	-1.25507	-0.545186	-1.28003	-0.335951	-3.0473	-2.12129	2.77089	6.82656	3.50233	3.72329	4.45039	-17.9654	-10.1225	-1.81033	-0.714261	9.43688	6.35034	14.8172	20.4071	15.7797	12.0988
ΔCurvature (deltaCurvature-degpermm)	SS87269	20	8.1328	-2.20901	1.54518	-2.01093	-0.833111	-1.71925	-3.72373	-1.10214	2.11393	2.45279	-0.953912	-0.679825	1.09713	-2.35852	-1.70362	-2.01999	-2.21373	-0.960238	1.16594	0.475327	0.66036	2.47142	0.598268	0.645853	-1.48873	-0.893047	0.214012	0.845221	2.34621	-0.101034	3.04489	14.5338	20.6591	18.6025	34.5736	30.2555	15.0239	10.2761	10.158	20.5158	34.5736	22.7691	21.7044	22.0718	24.5143	23.1802	24.2003
ΔCurvature (deltaCurvature-degpermm)	SS88801	20	13.9006	-1.81207	-1.33873	-1.37779	0.0463182	-0.561496	-1.76465	-1.03914	-0.063167	-0.107985	-0.999118	-1.19127	3.12111	-0.663831	0.430139	-1.59416	-1.7758	0.551457	-1.4264	-1.60725	2.2264	-0.22612	1.27885	0.0823978	-1.12871	-2.09382	0.0759373	-0.159426	-0.469519	-0.311381	7.59508	29.9725	38.6556	46.901	52.4229	47.4134	52.3955	46.1354	50.0957	41.563	33.5652	29.6085	32.7089	26.6065	27.9808	27.0227	22.6169
ΔCurvature (deltaCurvature-degpermm)	SS88776	22	12.5184	-0.769645	0.824194	0.344841	-0.086184	-0.306424	0.0498872	-0.748951	-0.811122	-0.628324	-0.929649	0.796173	0.226985	-1.40601	-1.73112	-0.747331	-0.847164	-2.15964	-0.100381	-0.113428	-0.716867	-2.15494	-0.264239	0.893147	0.466305	-0.171722	0.211017	-0.905534	-0.638796	0.667342	5.95707	28.8278	34.9355	32.7359	27.3593	36.9181	37.0219	33.5092	27.5004	17.7973	21.7272	19.9754	22.0759	24.1066	28.2909	29.8394	21.7036
ΔCurvature (deltaCurvature-degpermm)	SS87272	25	32.6257	-5.65428	-2.67979	-1.29519	-1.05756	-0.513305	-0.531083	-2.57403	0.645551	1.3495	-3.57569	0.52769	-1.52756	-1.07721	-0.459311	-2.27988	1.6737	-1.80836	1.40173	0.970039	-0.599399	0.893227	-4.2803	0.468639	0.322131	2.13955	-0.179893	-5.31133	-2.76853	-3.00892	14.2372	37.5862	56.0044	44.2616	32.2045	21.8012	18.9117	17.9357	17.9514	10.7862	13.9507	10.2115	11.8129	13.5369	11.5938	8.71997	12.0086
ΔCurvature (deltaCurvature-degpermm)	SS87279	20	60.3421	0.296532	-1.32016	-4.95006	-8.64974	-3.02518	-4.73467	-8.12162	-5.52102	-0.0477735	-2.29831	-3.4637	1.3081	-3.97982	2.34192	3.31477	-0.444475	2.77148	-2.18458	-0.49591	2.99385	1.58697	-0.173264	1.54901	3.08269	-2.92856	-2.52918	-3.30382	-6.10954	-5.04327	16.7717	19.3622	4.78547	-9.12728	-9.54183	-11.2895	-16.9734	-17.3844	-16.9713	-14.0532	-13.4306	-18.0389	-17.2656	-15.5076	-13.2501	-9.87237	-14.8641
ΔCurvature (deltaCurvature-degpermm)	SS87278	17	20.2861	0.25293	2.36312	-1.10669	-1.20687	0.655757	-1.1545	0.0637081	0.894665	0.26795	-0.301739	0.282981	-0.861773	-3.33491	-3.04844	-0.261345	0.657618	0.75248	-0.613149	-1.77085	-1.15908	0.168783	-3.33935	-2.32608	0.310285	-3.83395	-0.612759	-0.936221	1.48302	2.80751	15.1967	38.1551	25.2315	4.4395	-4.46199	-4.62918	-8.27125	-6.75304	-7.4955	-6.47856	-7.72932	-9.90044	-5.3626	-6.25787	-6.26477	-5.17159	-6.08689
			SEM
Data_Type	Male	GroupCount	sem_1	sem_2	sem_3	sem_4	sem_5	sem_6	sem_7	sem_8	sem_9	sem_10	sem_11	sem_12	sem_13	sem_14	sem_15	sem_16	sem_17	sem_18	sem_19	sem_20	sem_21	sem_22	sem_23	sem_24	sem_25	sem_26	sem_27	sem_28	sem_29	sem_30	sem_31	sem_32	sem_33	sem_34	sem_35	sem_36	sem_37	sem_38	sem_39	sem_40	sem_41	sem_42	sem_43	sem_44	sem_45	sem_46	sem_47
P return (revisit-10mmOut3mmIn-15s)	Empty-split	22	0.00773159	0.00796623	0.00877835	0.00908251	0.0103256	0.00942405	0.00924175	0.00862365	0.00842729	0.00821635	0.00764665	0.00860804	0.00759974	0.00807676	0.00919814	0.00999036	0.00968124	0.00798099	0.00693367	0.00597643	0.00751512	0.00868293	0.00823487	0.00743733	0.00826676	0.00895817	0.00789666	0.00951004	0.0090333	0.00746796	0.00694534	0.0071942	0.00849685	0.0082046	0.0099161	0.00952649	0.00817977	0.00887748	0.00758361	0.00811649	0.00700416	0.00786351	0.00836845	0.00847641	0.00930751	0.00975196	0.010427
P return (revisit-10mmOut3mmIn-15s)	Gr64fGAL4	12	0.00745254	0.00736621	0.00770905	0.00733129	0.00716523	0.00634895	0.00630882	0.00660526	0.0057386	0.00540997	0.00631825	0.00520351	0.00525847	0.00548063	0.00511888	0.00436211	0.00276636	0.00245461	0.00204209	0.00184483	0.00209044	0.00262613	0.00295758	0.00411202	0.00424174	0.00352427	0.00310609	0.00260569	0.00369162	0.0029246	0.003342	0.0032665	0.00291708	0.00316494	0.00371972	0.00434493	0.00496321	0.00583534	0.00676786	0.00727102	0.00787033	0.00818501	0.00842464	0.00813332	0.00746298	0.00775833	0.00490178
P return (revisit-10mmOut3mmIn-15s)	SS87269	20	0.00992773	0.0120352	0.0106512	0.00921582	0.00782762	0.00854306	0.0067706	0.00502194	0.00659146	0.00658326	0.00703936	0.00765316	0.00756105	0.00650336	0.00532949	0.00401524	0.00415304	0.00494146	0.00406885	0.00369716	0.00328502	0.0042824	0.00431977	0.00490436	0.00386615	0.00431187	0.00657007	0.0101368	0.0122627	0.00705447	0.00726783	0.00839087	0.00795272	0.00838407	0.00910245	0.00985879	0.00942788	0.0120621	0.0137582	0.0147525	0.0164556	0.0164723	0.0163113	0.0165426	0.0157159	0.0153509	0.0159019
P return (revisit-10mmOut3mmIn-15s)	SS88801	20	0.00825611	0.00797346	0.00818835	0.00781309	0.00823022	0.00781289	0.00728234	0.00666825	0.00699646	0.00680323	0.00564557	0.00669591	0.00762091	0.00669634	0.00598198	0.00600439	0.00700088	0.00658503	0.00643096	0.00661363	0.00715904	0.00737681	0.00799403	0.00682762	0.00819655	0.00631507	0.0073138	0.00729219	0.0069445	0.00713143	0.00612887	0.00639585	0.0061204	0.00612155	0.0063492	0.00683858	0.0068428	0.00753306	0.00826252	0.00810543	0.00955615	0.00920771	0.00976252	0.00912286	0.00922047	0.00951408	0.00850646
P return (revisit-10mmOut3mmIn-15s)	SS88776	22	0.00662145	0.00708828	0.00734578	0.0079113	0.00714592	0.00650427	0.00555563	0.00694617	0.00744572	0.00690078	0.00637508	0.00617676	0.00659911	0.0069888	0.00702722	0.00678868	0.00648671	0.00695966	0.00611892	0.00485027	0.00497033	0.00589918	0.00744164	0.00692043	0.00720558	0.00707061	0.00690971	0.00530828	0.00590821	0.00653576	0.00654814	0.0074416	0.00646674	0.00641715	0.00685678	0.00710343	0.00778556	0.00831074	0.00759778	0.00711965	0.00707593	0.00749184	0.00882126	0.00862856	0.00919117	0.0086933	0.00909902
P return (revisit-10mmOut3mmIn-15s)	SS87272	25	0.0088497	0.00861524	0.00873537	0.00856944	0.00833251	0.00839341	0.00824358	0.00804523	0.00898121	0.0101541	0.00934987	0.00892124	0.00871704	0.00945159	0.00944795	0.0105624	0.0103183	0.00985402	0.00990893	0.0102876	0.0106478	0.0107357	0.0100698	0.00995942	0.0102322	0.0112402	0.0107604	0.00999985	0.00991939	0.0108851	0.0106593	0.0113495	0.0117162	0.0117101	0.0130964	0.0137856	0.0131695	0.0133624	0.013357	0.0122919	0.0120367	0.0107912	0.0111945	0.0116926	0.0122597	0.0128583	0.0121622
P return (revisit-10mmOut3mmIn-15s)	SS87279	20	0.00857231	0.00759364	0.00729345	0.00801094	0.00789355	0.00890292	0.0084099	0.00773148	0.00828932	0.00767743	0.00810428	0.00848048	0.00901401	0.00960344	0.00967763	0.00938871	0.00900593	0.00895656	0.00910491	0.00905304	0.00787435	0.00855574	0.00802262	0.00834006	0.00997462	0.00952616	0.00862905	0.00871696	0.0100769	0.010381	0.0101609	0.0104583	0.00857174	0.00835981	0.00802308	0.00890708	0.00945128	0.0101838	0.00983059	0.00766683	0.008463	0.00968449	0.00954135	0.010455	0.0102325	0.00907375	0.00901632
P return (revisit-10mmOut3mmIn-15s)	SS87278	17	0.0116252	0.0127752	0.0118293	0.0114528	0.0125535	0.0142423	0.0132574	0.0127835	0.0134454	0.0162432	0.0170134	0.0178978	0.0182179	0.0171302	0.0181123	0.0218641	0.0226142	0.022276	0.0238724	0.0225196	0.021569	0.0226892	0.0213115	0.0209879	0.024232	0.0227863	0.0223282	0.0192511	0.0155922	0.0153473	0.0161418	0.0147764	0.0145648	0.0160626	0.0141738	0.0117433	0.0126922	0.0138476	0.0108715	0.0100808	0.00879676	0.00981269	0.00904769	0.00812225	0.00807271	0.00830299	0.0086441
ΔSpeed (deltaSpeed-mmpersec)	Empty-split	22	0.0222916	0.0213355	0.0220146	0.0216898	0.0266278	0.0258396	0.030486	0.0285952	0.0293099	0.0209597	0.0241739	0.0181185	0.0264145	0.0306605	0.0219876	0.0235815	0.022943	0.0262422	0.0280328	0.0284787	0.0297625	0.0242568	0.0223348	0.0204866	0.0199239	0.0175589	0.0247718	0.0269563	0.0259704	0.0281054	0.0651524	0.0840725	0.0966619	0.086063	0.0751575	0.0729759	0.0675668	0.0749672	0.0727347	0.0769394	0.0673254	0.0723375	0.0744576	0.0689698	0.0717145	0.0645187	0.0685584
ΔSpeed (deltaSpeed-mmpersec)	Gr64fGAL4	12	0.0208046	0.0259409	0.0314606	0.0200071	0.0231776	0.0198713	0.0244	0.0262277	0.0237576	0.030946	0.0330368	0.0271591	0.030362	0.0275611	0.0369997	0.0276302	0.0342734	0.0246886	0.0209101	0.0306905	0.0224183	0.0206354	0.0190539	0.0162526	0.0204374	0.0255521	0.0302599	0.0322083	0.028227	0.035872	0.0579458	0.0473889	0.0370122	0.0402176	0.0555128	0.0616278	0.0579986	0.0583759	0.0632986	0.064294	0.061696	0.0573409	0.0563183	0.0539345	0.0530062	0.0523333	0.0508668
ΔSpeed (deltaSpeed-mmpersec)	SS87269	20	0.0291918	0.0440407	0.0511778	0.0483283	0.0521517	0.0393583	0.0362351	0.0305003	0.0483919	0.0422422	0.0349741	0.0405583	0.0405694	0.0359256	0.0363879	0.0268143	0.0369823	0.0490821	0.0299121	0.030967	0.0539714	0.0462792	0.0454738	0.0422935	0.0465136	0.0417421	0.0461615	0.0396189	0.0465604	0.0511779	0.103102	0.10846	0.0924786	0.084951	0.0854961	0.0894809	0.0949235	0.0932365	0.0960516	0.0947559	0.095217	0.0944046	0.0923773	0.089999	0.0889544	0.0865301	0.0877032
ΔSpeed (deltaSpeed-mmpersec)	SS88801	20	0.0474195	0.0401531	0.0423972	0.0439957	0.0406045	0.0432508	0.0401125	0.0468241	0.0369469	0.0229602	0.0329104	0.0341477	0.0392864	0.030902	0.0328116	0.0376376	0.0405223	0.0341377	0.0336273	0.0333133	0.0248376	0.0389533	0.0474969	0.0435475	0.0350623	0.0368043	0.0321899	0.0380195	0.0321123	0.0366709	0.0909566	0.101362	0.109272	0.0979264	0.0905308	0.0830537	0.0818138	0.0858397	0.0861771	0.0868999	0.0855888	0.0929124	0.091888	0.0973772	0.106987	0.117591	0.120218
ΔSpeed (deltaSpeed-mmpersec)	SS88776	22	0.0296038	0.033723	0.0346773	0.0310495	0.0267525	0.0334828	0.0308679	0.0399763	0.0361804	0.0257187	0.0354113	0.0322583	0.0229276	0.0320681	0.0259078	0.0305158	0.0267339	0.0237025	0.0330088	0.0343232	0.0296922	0.0251531	0.0220869	0.0268753	0.0266949	0.0280884	0.0372305	0.0446354	0.0388689	0.0330594	0.0895412	0.0841354	0.0694802	0.0663697	0.0610326	0.0616636	0.0623128	0.0635944	0.0642989	0.0589883	0.06023	0.0619966	0.0688712	0.0714983	0.0727267	0.0801185	0.0852729
ΔSpeed (deltaSpeed-mmpersec)	SS87272	25	0.0208842	0.0228607	0.0315775	0.026412	0.0230351	0.0275195	0.0250143	0.0261603	0.0259707	0.0216694	0.0199184	0.023835	0.0235358	0.0234695	0.0170376	0.0290544	0.0223283	0.0331625	0.0269217	0.0236094	0.0331187	0.0277611	0.0283037	0.0242794	0.0297613	0.0257678	0.0364315	0.0349388	0.0337585	0.0376973	0.0572705	0.0952691	0.0927807	0.0922693	0.0962224	0.0919501	0.0861613	0.0831279	0.0766516	0.0697479	0.0738315	0.0744334	0.0758406	0.070478	0.0654436	0.0712667	0.0695099
ΔSpeed (deltaSpeed-mmpersec)	SS87279	20	0.0253243	0.0257445	0.0209191	0.0227361	0.0198809	0.0216597	0.0278328	0.0397152	0.0304304	0.0273505	0.026355	0.0219387	0.0202565	0.0198013	0.0314156	0.0175687	0.0137484	0.0194653	0.0262036	0.0168479	0.0215434	0.0216053	0.0235001	0.0282686	0.0244059	0.0312556	0.0340696	0.0232221	0.0248689	0.0380219	0.0975352	0.217699	0.270979	0.28384	0.288521	0.282848	0.250379	0.227351	0.207868	0.18824	0.169831	0.169652	0.171233	0.150367	0.139094	0.145365	0.126728
ΔSpeed (deltaSpeed-mmpersec)	SS87278	17	0.0265956	0.0279095	0.0358173	0.0315553	0.0355127	0.0396563	0.0362871	0.0384222	0.0216977	0.0201066	0.0323501	0.0341951	0.0296557	0.0432538	0.0345076	0.0328911	0.05347	0.0331124	0.0252126	0.0255866	0.0301702	0.0236721	0.0229817	0.0290735	0.0337108	0.0290706	0.0349003	0.0390832	0.0304807	0.0391529	0.101048	0.102661	0.170394	0.172986	0.155284	0.131494	0.114381	0.0725289	0.0924392	0.0952107	0.0896987	0.0822202	0.0683421	0.0724087	0.0769093	0.0741612	0.0666904
ΔCurvature (deltaCurvature-degpermm)	Empty-split	22	2.50855	1.27214	1.18242	0.983058	0.920092	1.56182	0.956402	1.363	1.41574	1.16766	1.38449	1.15652	1.10295	1.21512	1.45451	2.08459	1.3116	1.52065	1.22386	1.58665	1.57406	1.25057	1.38883	1.6926	1.17991	1.28214	1.3123	1.4383	0.988743	1.1525	2.63845	2.60444	2.26804	1.77984	2.19644	2.03139	1.62244	2.27857	2.38669	2.06497	1.72092	1.72678	1.9643	2.04497	1.87845	1.58494	1.71132
ΔCurvature (deltaCurvature-degpermm)	Gr64fGAL4	12	4.61405	1.56945	1.78634	1.5609	1.72219	1.58097	1.94764	1.86452	1.29577	2.18183	2.90097	1.45295	1.89704	2.06229	1.44194	2.79909	1.82986	1.41018	1.25163	1.57665	1.72601	1.73363	1.43813	1.62438	1.47505	0.968052	1.52735	2.21334	1.34298	2.49826	2.27306	3.78267	6.02406	7.04945	3.89785	9.84562	12.9121	9.41112	5.04913	5.25634	11.071	3.32548	6.84953	5.76894	4.05662	6.56261	5.85345
ΔCurvature (deltaCurvature-degpermm)	SS87269	20	4.43032	1.49847	1.42501	1.29115	2.2128	1.33792	1.01151	1.33885	1.75845	1.38039	1.64119	2.12231	1.28509	1.54419	2.10062	1.44159	1.64096	1.99222	1.93813	1.518	2.34245	2.4789	2.15187	1.75843	1.48471	2.03889	1.63569	1.8231	2.37038	2.43619	2.0042	4.58696	7.80882	7.26567	6.79613	4.47096	7.53227	7.93895	4.4262	6.47469	11.0103	4.93506	4.17879	3.96598	12.8726	5.90263	5.52664
ΔCurvature (deltaCurvature-degpermm)	SS88801	20	3.52675	1.01683	1.58148	1.2714	1.37022	1.40923	1.2054	0.925165	1.0925	1.48499	1.53211	0.922574	2.05659	1.01412	1.53564	1.23451	1.13217	1.49389	1.25824	1.19203	1.03705	1.58183	1.64216	1.01483	1.17658	1.12605	1.54251	1.16666	0.921491	0.924856	2.58156	5.68424	8.4274	8.98398	6.99267	4.95085	8.91496	6.53146	10.2157	9.85582	4.67303	4.82434	5.92675	3.07579	3.83251	4.20777	3.70844
ΔCurvature (deltaCurvature-degpermm)	SS88776	22	1.87473	1.4856	1.42236	1.29382	0.84676	1.47892	1.39347	1.03624	1.11142	1.25455	1.14528	1.2845	1.44035	1.04544	0.757446	1.0064	0.973491	1.09168	1.38766	1.41458	0.948705	1.08096	0.966458	1.22642	1.13233	1.03039	1.63635	1.1877	1.23495	1.12145	2.42433	6.14964	6.89501	5.10652	5.11958	8.30022	10.3097	8.92378	8.20286	4.23541	4.03203	3.4045	2.91122	3.53442	6.04225	4.13145	3.4574
ΔCurvature (deltaCurvature-degpermm)	SS87272	25	5.3531	1.65338	2.14777	1.75356	1.44701	1.28931	1.43776	1.94777	2.07913	1.69014	1.2724	1.72452	2.12923	1.42791	1.64659	1.52235	1.44252	1.67349	1.75244	1.25062	1.9326	2.62442	2.2464	1.79984	1.89704	1.91511	1.54289	2.1106	1.76163	2.26722	3.528	4.40352	4.9203	6.15453	6.60758	4.31455	3.82512	4.41073	4.64645	3.86992	3.00275	2.94249	3.66654	3.58419	3.31571	3.51315	4.28118
ΔCurvature (deltaCurvature-degpermm)	SS87279	20	11.7587	3.59042	4.16251	2.01236	2.70445	2.76978	2.77512	2.55013	2.10279	3.99389	1.96722	2.78919	2.98173	1.27951	2.77332	4.48721	2.16382	5.60789	2.51463	2.83236	2.12936	3.03358	1.92412	3.28893	3.25089	2.62252	2.80224	3.31313	3.72666	3.66978	6.04729	4.86785	7.6945	5.55347	8.49595	5.95615	4.71017	3.5786	3.71283	4.32541	5.15654	4.23715	4.01629	4.43576	5.37479	5.39776	3.8956
ΔCurvature (deltaCurvature-degpermm)	SS87278	17	4.39577	1.59022	1.60018	1.55738	1.97167	2.046	2.18756	2.11743	2.04565	1.82235	2.72146	1.64322	1.6753	1.5137	2.17918	1.90169	2.88536	1.48719	2.07907	1.76694	2.07178	1.81765	1.60208	1.72569	2.47396	1.65909	1.90014	2.12432	1.80754	2.00415	4.48951	6.65415	5.16029	4.1022	3.55177	2.8937	3.15671	3.37417	2.83976	2.63678	1.82394	1.70712	2.31814	2.01174	1.62192	2.4739	1.86372
			STD
Data_Type	Male	GroupCount	std_1	std_2	std_3	std_4	std_5	std_6	std_7	std_8	std_9	std_10	std_11	std_12	std_13	std_14	std_15	std_16	std_17	std_18	std_19	std_20	std_21	std_22	std_23	std_24	std_25	std_26	std_27	std_28	std_29	std_30	std_31	std_32	std_33	std_34	std_35	std_36	std_37	std_38	std_39	std_40	std_41	std_42	std_43	std_44	std_45	std_46	std_47
P return (revisit-10mmOut3mmIn-15s)	Empty-split	22	0.0362644	0.037365	0.0411741	0.0426008	0.0484314	0.0442027	0.0433476	0.0404485	0.0395275	0.0385381	0.035866	0.0403753	0.0356459	0.0378834	0.0431431	0.0468589	0.045409	0.0374342	0.0325218	0.0280319	0.035249	0.0407265	0.038625	0.0348842	0.0387746	0.0420175	0.0370386	0.044606	0.0423699	0.0350278	0.0325765	0.0337438	0.0398538	0.038483	0.0465106	0.0446832	0.0383665	0.0416391	0.0355703	0.0380697	0.0328524	0.0368831	0.0392515	0.0397579	0.0436561	0.0457408	0.0489068
P return (revisit-10mmOut3mmIn-15s)	Gr64fGAL4	12	0.0258164	0.0255173	0.0267049	0.0253964	0.0248211	0.0219934	0.0218544	0.0228813	0.0198791	0.0187407	0.0218871	0.0180255	0.0182159	0.0189855	0.0177323	0.0151108	0.00958295	0.00850301	0.00707401	0.00639068	0.00724151	0.0090972	0.0102454	0.0142444	0.0146938	0.0122084	0.0107598	0.00902637	0.0127881	0.0101311	0.011577	0.0113155	0.010105	0.0109637	0.0128855	0.0150513	0.0171931	0.0202142	0.0234446	0.0251876	0.0272636	0.0283537	0.0291838	0.0281746	0.0258525	0.0268757	0.0169803
P return (revisit-10mmOut3mmIn-15s)	SS87269	20	0.0443981	0.0538231	0.0476336	0.0412144	0.0350062	0.0382057	0.030279	0.0224588	0.0294779	0.0294412	0.031481	0.034226	0.033814	0.0290839	0.0238342	0.0179567	0.018573	0.0220989	0.0181965	0.0165342	0.014691	0.0191515	0.0193186	0.021933	0.0172899	0.0192833	0.0293822	0.0453332	0.0548403	0.0315486	0.0325027	0.0375251	0.0355657	0.0374947	0.0407074	0.0440899	0.0421628	0.0539432	0.0615287	0.0659753	0.0735916	0.0736666	0.0729464	0.0739808	0.0702838	0.0686514	0.0711157
P return (revisit-10mmOut3mmIn-15s)	SS88801	20	0.0369224	0.0356584	0.0366194	0.0349412	0.0368066	0.0349403	0.0325676	0.0298213	0.0312891	0.030425	0.0252477	0.029945	0.0340817	0.0299469	0.0267522	0.0268524	0.0313089	0.0294492	0.0287601	0.0295771	0.0320162	0.0329901	0.0357504	0.030534	0.0366561	0.0282418	0.0327083	0.0326117	0.0310567	0.0318927	0.0274091	0.0286031	0.0273713	0.0273764	0.0283945	0.0305831	0.0306019	0.0336889	0.0369511	0.0362486	0.0427364	0.0411781	0.0436593	0.0407987	0.0412352	0.0425483	0.0380421
P return (revisit-10mmOut3mmIn-15s)	SS88776	22	0.0310573	0.033247	0.0344548	0.0371073	0.0335173	0.0305077	0.0260582	0.0325804	0.0349235	0.0323675	0.0299018	0.0289716	0.0309526	0.0327804	0.0329606	0.0318417	0.0304254	0.0326437	0.0287003	0.0227498	0.0233129	0.0276696	0.0349044	0.0324597	0.0337971	0.0331641	0.0324094	0.024898	0.0277119	0.0306554	0.0307135	0.0349042	0.0303317	0.0300991	0.0321611	0.0333181	0.0365175	0.0389808	0.0356367	0.0333941	0.033189	0.0351399	0.0413754	0.0404715	0.0431104	0.0407752	0.0426782
P return (revisit-10mmOut3mmIn-15s)	SS87272	25	0.0442485	0.0430762	0.0436769	0.0428472	0.0416625	0.0419671	0.0412179	0.0402261	0.0449061	0.0507705	0.0467494	0.0446062	0.0435852	0.0472579	0.0472397	0.0528119	0.0515913	0.0492701	0.0495446	0.0514379	0.0532391	0.0536785	0.0503491	0.0497971	0.0511609	0.0562012	0.0538019	0.0499992	0.0495969	0.0544255	0.0532965	0.0567475	0.0585812	0.0585504	0.0654818	0.0689279	0.0658473	0.0668118	0.0667851	0.0614595	0.0601833	0.0539558	0.0559723	0.0584632	0.0612983	0.0642917	0.0608108
P return (revisit-10mmOut3mmIn-15s)	SS87279	20	0.0383365	0.0339598	0.0326173	0.035826	0.035301	0.0398151	0.0376102	0.0345762	0.037071	0.0343345	0.0362435	0.0379259	0.0403119	0.0429479	0.0432797	0.0419876	0.0402757	0.040055	0.0407184	0.0404864	0.0352152	0.0382624	0.0358782	0.0372979	0.0446079	0.0426023	0.0385903	0.0389834	0.0450651	0.0464254	0.0454409	0.0467708	0.038334	0.0373862	0.0358803	0.0398337	0.0422674	0.0455433	0.0439638	0.0342871	0.0378477	0.0433104	0.0426702	0.0467562	0.0457611	0.0405791	0.0403222
P return (revisit-10mmOut3mmIn-15s)	SS87278	17	0.0479318	0.0526735	0.0487734	0.047221	0.0517595	0.0587225	0.0546618	0.0527078	0.055437	0.0669722	0.0701482	0.0737945	0.0751144	0.0706296	0.0746791	0.0901478	0.0932407	0.0918463	0.0984283	0.0928508	0.0889314	0.0935499	0.0878697	0.0865352	0.0999113	0.0939503	0.0920615	0.0793742	0.0642884	0.0632785	0.0665542	0.0609245	0.0600521	0.0662279	0.0584399	0.0484189	0.0523313	0.0570952	0.0448245	0.0415641	0.03627	0.0404588	0.0373046	0.0334889	0.0332846	0.0342341	0.0356405
ΔSpeed (deltaSpeed-mmpersec)	Empty-split	22	0.104557	0.100072	0.103257	0.101734	0.124895	0.121199	0.142992	0.134123	0.137475	0.0983099	0.113386	0.0849832	0.123895	0.14381	0.103131	0.110607	0.107612	0.123087	0.131486	0.133577	0.139599	0.113774	0.104759	0.0960906	0.0934516	0.0823584	0.11619	0.126436	0.121812	0.131826	0.305592	0.394335	0.453385	0.403671	0.35252	0.342287	0.316917	0.351627	0.341156	0.360878	0.315784	0.339293	0.349237	0.323497	0.336371	0.30262	0.321567
ΔSpeed (deltaSpeed-mmpersec)	Gr64fGAL4	12	0.0720691	0.0898621	0.108983	0.0693066	0.0802894	0.068836	0.0845242	0.0908555	0.0822988	0.1072	0.114443	0.094082	0.105177	0.0954745	0.128171	0.0957139	0.118727	0.0855237	0.0724348	0.106315	0.0776594	0.0714832	0.0660047	0.0563006	0.0707973	0.0885152	0.104823	0.111573	0.0977813	0.124264	0.20073	0.16416	0.128214	0.139318	0.192302	0.213485	0.200913	0.20222	0.219273	0.222721	0.213721	0.198635	0.195092	0.186834	0.183619	0.181288	0.176208
ΔSpeed (deltaSpeed-mmpersec)	SS87269	20	0.13055	0.196956	0.228874	0.216131	0.233229	0.176016	0.162048	0.136402	0.216415	0.188913	0.156409	0.181382	0.181432	0.160664	0.162732	0.119917	0.16539	0.219502	0.133771	0.138489	0.241367	0.206967	0.203365	0.189142	0.208015	0.186676	0.20644	0.177181	0.208225	0.228875	0.461088	0.485048	0.413577	0.379912	0.38235	0.400171	0.424511	0.416966	0.429556	0.423761	0.425823	0.42219	0.413124	0.402488	0.397816	0.386974	0.392221
ΔSpeed (deltaSpeed-mmpersec)	SS88801	20	0.212066	0.17957	0.189606	0.196755	0.181589	0.193423	0.179389	0.209404	0.165231	0.102681	0.14718	0.152713	0.175694	0.138198	0.146738	0.168321	0.181221	0.152669	0.150386	0.148982	0.111077	0.174205	0.212413	0.19475	0.156803	0.164594	0.143958	0.170028	0.143611	0.163997	0.40677	0.453303	0.48868	0.43794	0.404866	0.371428	0.365883	0.383887	0.385396	0.388628	0.382765	0.415517	0.410936	0.435484	0.478462	0.525881	0.537633
ΔSpeed (deltaSpeed-mmpersec)	SS88776	22	0.138854	0.158175	0.162651	0.145635	0.12548	0.157048	0.144783	0.187505	0.169701	0.120632	0.166094	0.151305	0.10754	0.150413	0.121518	0.143132	0.125393	0.111174	0.154825	0.16099	0.139269	0.117978	0.103597	0.126056	0.12521	0.131746	0.174627	0.209359	0.182311	0.155062	0.419985	0.39463	0.325891	0.311302	0.286268	0.289228	0.292273	0.298284	0.301588	0.27668	0.282504	0.29079	0.323035	0.335357	0.341118	0.375789	0.399965
ΔSpeed (deltaSpeed-mmpersec)	SS87272	25	0.104421	0.114303	0.157887	0.13206	0.115176	0.137597	0.125072	0.130802	0.129853	0.108347	0.099592	0.119175	0.117679	0.117347	0.0851881	0.145272	0.111642	0.165813	0.134609	0.118047	0.165594	0.138806	0.141519	0.121397	0.148806	0.128839	0.182157	0.174694	0.168792	0.188487	0.286352	0.476345	0.463903	0.461346	0.481112	0.459751	0.430807	0.41564	0.383258	0.348739	0.369157	0.372167	0.379203	0.35239	0.327218	0.356333	0.34755
ΔSpeed (deltaSpeed-mmpersec)	SS87279	20	0.113254	0.115133	0.093553	0.101679	0.0889102	0.0968652	0.124472	0.177612	0.136089	0.122315	0.117863	0.0981128	0.09059	0.0885543	0.140495	0.0785697	0.0614849	0.0870516	0.117186	0.0753462	0.0963449	0.0966221	0.105096	0.126421	0.109147	0.139779	0.152364	0.103853	0.111217	0.170039	0.436191	0.973579	1.21185	1.26937	1.2903	1.26493	1.11973	1.01674	0.929613	0.841835	0.759506	0.758707	0.765778	0.672464	0.622049	0.65009	0.566747
ΔSpeed (deltaSpeed-mmpersec)	SS87278	17	0.109657	0.115074	0.147679	0.130106	0.146422	0.163507	0.149616	0.158419	0.089462	0.0829018	0.133383	0.14099	0.122274	0.17834	0.142279	0.135614	0.220463	0.136526	0.103954	0.105496	0.124395	0.0976027	0.094756	0.119873	0.138993	0.119861	0.143898	0.161144	0.125675	0.161432	0.416632	0.423283	0.702551	0.713239	0.64025	0.542162	0.471605	0.299044	0.381137	0.392564	0.369837	0.339003	0.281782	0.298549	0.317105	0.305774	0.274972
ΔCurvature (deltaCurvature-degpermm)	Empty-split	22	11.7661	5.96687	5.54604	4.61095	4.31561	7.3256	4.48592	6.39305	6.64041	5.47681	6.49382	5.42456	5.17329	5.6994	6.82225	9.7776	6.15195	7.13248	5.7404	7.44204	7.38298	5.86568	6.51419	7.93902	5.53428	6.01377	6.15525	6.74621	4.63761	5.40569	12.3754	12.2159	10.638	8.34821	10.3022	9.52806	7.6099	10.6874	11.1946	9.68556	8.07185	8.09933	9.21339	9.59178	8.8107	7.43401	8.02679
ΔCurvature (deltaCurvature-degpermm)	Gr64fGAL4	12	15.9835	5.43672	6.18807	5.40712	5.96582	5.47665	6.74683	6.45887	4.48868	7.55807	10.0492	5.03318	6.57154	7.14399	4.99503	9.69633	6.33884	4.88501	4.33578	5.46166	5.97907	6.00547	4.98184	5.62701	5.10972	3.35343	5.2909	7.66723	4.65221	8.65421	7.8741	11.348	17.0386	18.6511	8.71586	24.1168	28.8723	16.3005	11.2902	10.5127	24.7554	8.14572	19.3734	17.3068	11.4739	20.7528	19.4137
ΔCurvature (deltaCurvature-degpermm)	SS87269	20	19.813	6.70135	6.37282	5.77419	9.89595	5.98338	4.52359	5.98751	7.86402	6.1733	7.33963	9.49126	5.7471	6.90582	9.39425	6.44697	7.33861	8.90948	8.66757	6.78869	10.4757	11.086	9.62346	7.86396	6.63982	9.11819	7.31502	8.15317	10.6007	10.895	8.96308	18.9125	31.2353	26.1967	25.4288	15.4879	27.158	23.8169	13.9969	20.4748	38.1408	17.7936	14.4757	13.1537	44.5919	21.2822	22.1066
ΔCurvature (deltaCurvature-degpermm)	SS88801	20	15.7721	4.54739	7.07259	5.68589	6.12782	6.30227	5.3907	4.13746	4.8858	6.64109	6.85183	4.12588	9.19733	4.5353	6.86759	5.52092	5.06321	6.68089	5.62701	5.33093	4.63784	7.07418	7.34398	4.53845	5.26184	5.03587	6.89833	5.21745	4.12103	4.13608	11.5451	23.4367	30.3854	34.7948	26.1642	17.8505	29.5676	20.6543	33.8818	35.5357	18.0986	18.051	23.707	11.9125	16.26	17.8521	15.2903
ΔCurvature (deltaCurvature-degpermm)	SS88776	22	8.79326	6.96809	6.67147	6.06856	3.97166	6.93674	6.53597	4.8604	5.213	5.88438	5.37183	6.02484	6.75586	4.90353	3.55274	4.72041	4.56608	5.12043	6.5087	6.63499	4.44982	5.07014	4.53309	5.7524	5.3111	4.83295	7.67514	5.5708	5.79244	5.26008	11.3711	26.8057	29.253	19.7775	19.1557	27.5287	32.6022	29.5968	30.6923	17.463	16.6245	14.0371	12.6897	15.4062	27.6891	19.3782	15.8438
ΔCurvature (deltaCurvature-degpermm)	SS87272	25	25.6726	8.09988	10.5219	8.59066	7.08888	6.3163	7.18881	9.73886	10.3956	8.27998	6.36201	8.44841	10.6462	6.9953	8.06662	7.61176	7.06689	8.19837	8.58516	6.12679	9.46778	12.857	11.0051	8.9992	9.29357	9.38209	7.71443	10.3398	8.63021	11.1071	17.2836	19.6932	21.4471	26.1114	28.8018	19.2953	17.5289	20.2125	22.2836	18.5595	14.7104	14.4152	18.3327	17.9209	16.5785	17.5657	21.4059
ΔCurvature (deltaCurvature-degpermm)	SS87279	20	49.888	14.8037	17.1625	8.77168	11.7884	11.7512	11.7738	11.1157	8.41117	17.409	8.3462	11.8335	11.5482	5.11804	11.7662	19.0376	8.92165	23.1219	10.3681	12.0167	8.77958	12.8704	8.16334	13.9537	13.4038	10.8129	11.5539	13.6604	15.3654	15.1309	25.6565	21.2184	33.5396	24.207	36.0452	25.9622	20.5312	15.5987	16.1838	18.854	22.4768	18.4693	17.5066	19.335	23.4282	23.5283	16.9805
ΔCurvature (deltaCurvature-degpermm)	SS87278	17	18.1242	6.55665	6.59771	6.42123	8.1294	8.43585	9.01953	8.73041	8.43443	7.51373	10.8858	6.77518	6.90744	6.24115	8.98498	7.84089	11.8967	6.13183	8.57223	7.2853	8.54217	7.49438	6.60556	7.11522	10.2004	6.84062	7.83447	8.75881	7.45267	8.26333	18.5107	26.6166	21.2764	16.9138	14.6443	11.931	13.0155	13.9121	11.7086	10.8717	7.52028	7.03863	9.55795	8.29462	6.68736	10.2002	7.68433
[truncated: 89 more columns]

## Sheet: Figure8G
				time_1	time_2	time_3	time_4	time_5	time_6	time_7	time_8	time_9	time_10	time_11	time_12	time_13	time_14	time_15	time_16	time_17	time_18	time_19	time_20	time_21	time_22	time_23	time_24	time_25	time_26	time_27	time_28	time_29	time_30	time_31	time_32	time_33	time_34	time_35	time_36	time_37	time_38	time_39	time_40	time_41	time_42	time_43	time_44	time_45	time_46
			Time (s)	0	0.333333	0.666667	1	1.33333	1.66667	2	2.33333	2.66667	3	3.33333	3.66667	4	4.33333	4.66667	5	5.33333	5.66667	6	6.33333	6.66667	7	7.33333	7.66667	8	8.33333	8.66667	9	9.33333	9.66667	10	10.3333	10.6667	11	11.3333	11.6667	12	12.3333	12.6667	13	13.3333	13.6667	14	14.3333	14.6667	15
				Mean
Data_Type	Male	Trial	GroupCount	mean_ 1	mean_ 2	mean_ 3	mean_ 4	mean_ 5	mean_ 6	mean_ 7	mean_ 8	mean_ 9	mean_10	mean_11	mean_12	mean_13	mean_14	mean_15	mean_16	mean_17	mean_18	mean_19	mean_20	mean_21	mean_22	mean_23	mean_24	mean_25	mean_26	mean_27	mean_28	mean_29	mean_30	mean_31	mean_32	mean_33	mean_34	mean_35	mean_36	mean_37	mean_38	mean_39	mean_40	mean_41	mean_42	mean_43	mean_44	mean_45	mean_46
Speed (Speed-mmpersec)	Gr64fGAL4	AirLED1	24	1.11518	1.12761	1.34659	1.33606	1.25365	1.25819	1.24746	1.29515	1.26261	1.32923	1.24474	1.32672	1.24088	1.27022	1.37363	1.30749	1.28671	1.31438	1.37657	1.3688	1.29526	1.21731	1.21816	1.1948	1.23918	1.32061	1.29574	1.32766	1.26059	1.47456	1.27052	0.760135	0.450768	0.380106	0.3443	0.334402	0.362143	0.354236	0.368113	0.382644	0.407448	0.449788	0.454102	0.469104	0.489748	0.502743
Speed (Speed-mmpersec)	Gr64fGAL4	AirLED2	24	0.951068	1.09502	1.05657	1.04582	1.10625	1.11593	0.985621	0.998057	1.04706	1.00492	1.06858	1.06931	1.09608	0.983509	1.11848	1.06366	1.1759	1.07406	1.11244	1.08775	1.11388	1.1583	1.13924	1.10236	1.04574	1.06434	1.10774	1.06529	1.14666	1.06463	0.968426	0.530246	0.342893	0.325783	0.363116	0.303484	0.279866	0.285697	0.335655	0.389937	0.439803	0.429721	0.457653	0.498068	0.517688	0.498111
Speed (Speed-mmpersec)	Gr64fGAL4	AirLED3	24	1.01538	1.12539	1.04649	1.02311	1.04748	0.99478	0.934833	0.994337	1.02339	1.00094	1.03453	1.07502	1.06108	1.03125	1.01705	1.03281	1.05534	1.05558	0.984046	1.09867	1.15897	1.18634	1.16387	1.09585	1.02557	1.06469	1.06803	1.07697	0.998871	1.03028	0.946938	0.593097	0.466453	0.415642	0.34588	0.336237	0.339292	0.343616	0.380813	0.403829	0.42259	0.442653	0.479035	0.530092	0.483112	0.510862
Speed (Speed-mmpersec)	Gr64fGAL4	AirLED4	24	0.980882	1.02728	1.08105	1.01043	1.02772	1.12589	1.17535	1.1283	1.08298	1.13519	1.10714	1.08371	1.12512	1.05975	1.18355	1.10485	1.04845	1.08307	1.14664	1.11638	1.08661	1.11487	1.12081	1.04008	1.04304	0.998577	1.0291	0.994488	1.04729	1.00817	0.816531	0.448476	0.338241	0.312853	0.296628	0.307781	0.324377	0.326181	0.35858	0.389261	0.392613	0.399323	0.411751	0.465895	0.450705	0.464602
Speed (Speed-mmpersec)	Gr64fGAL4	AirLED5	24	1.00163	1.22256	1.13625	1.09104	1.15918	1.17637	0.986611	1.0609	1.0741	1.06249	1.08205	1.20015	1.1864	1.14012	1.17734	1.16299	1.19387	1.20262	1.18886	1.17292	1.13945	1.08991	1.11293	1.15293	1.12109	1.10187	1.12228	1.09096	1.09863	1.19896	1.00026	0.584273	0.450873	0.481278	0.397119	0.343862	0.307911	0.324092	0.32285	0.358179	0.375193	0.37782	0.408842	0.424507	0.45979	0.510753
Speed (Speed-mmpersec)	Gr64fGAL4	AirLED6	24	0.811198	0.941402	0.993927	0.891246	0.836274	0.888685	0.932535	0.987553	1.02744	0.920649	0.951042	1.0092	1.05077	0.904868	0.874698	0.874184	0.914273	0.871086	0.877522	0.935304	0.97627	0.938618	0.952128	1.00116	1.0149	0.94887	1.02684	1.01382	1.03846	1.0222	0.754914	0.36419	0.342201	0.400693	0.447885	0.433235	0.361156	0.375655	0.384588	0.391941	0.417065	0.431347	0.459844	0.457005	0.453459	0.461249
Speed (Speed-mmpersec)	SS87269	AirLED1	18	1.85115	1.98481	1.75281	2.0412	2.14853	1.95752	2.14847	2.06116	1.86112	2.01911	2.18555	1.86383	1.77727	1.8927	1.90455	1.89014	2.10853	2.00884	1.73379	1.86175	1.69627	1.67718	1.82532	1.91696	1.75549	1.77647	1.77442	1.76111	1.77706	1.69769	1.37906	0.610647	0.433599	0.456701	0.452334	0.436946	0.455214	0.447663	0.451241	0.439988	0.444246	0.457967	0.535064	0.534249	0.5526	0.602262
Speed (Speed-mmpersec)	SS87269	AirLED2	20	1.6936	1.91706	1.83848	1.94117	1.93506	2.03026	1.86522	1.96562	2.18565	2.00698	1.9722	2.00639	1.86225	1.74511	1.89747	1.91483	1.92628	1.81051	1.74154	1.73281	1.6978	1.73254	1.88162	1.82738	1.84282	1.76954	1.6076	1.73549	1.69664	1.93821	1.47606	0.612954	0.514675	0.534273	0.452133	0.449691	0.394396	0.378404	0.379907	0.374031	0.441346	0.462118	0.509261	0.478713	0.574921	0.576586
Speed (Speed-mmpersec)	SS87269	AirLED3	20	1.57038	1.95004	1.89281	1.89675	1.91823	2.11726	2.09062	1.90346	2.03992	1.81711	1.83421	1.80691	1.75327	1.85505	1.79493	1.87122	1.89064	1.83128	1.80914	1.88178	1.70822	1.72639	1.65414	1.73951	2.04117	1.93869	1.86406	1.9628	1.8161	1.83279	1.34707	0.853379	0.698927	0.708229	0.48421	0.401784	0.435228	0.396359	0.386674	0.389092	0.384905	0.397044	0.427633	0.47138	0.473111	0.529503
Speed (Speed-mmpersec)	SS87269	AirLED4	20	1.59943	1.64075	1.62633	1.85445	1.73182	1.70602	1.89713	1.68976	1.63003	1.71232	1.84948	1.74444	1.73875	1.82102	1.67418	1.88419	1.86733	1.89922	1.68562	1.54418	1.64559	1.74993	1.71894	1.77971	1.81203	1.70829	1.67586	1.88305	1.89845	1.73118	1.40433	0.665983	0.458891	0.491846	0.417473	0.41521	0.431022	0.369977	0.331305	0.333975	0.356139	0.3844	0.393452	0.420443	0.455435	0.504473
Speed (Speed-mmpersec)	SS87269	AirLED5	20	1.69702	1.87361	1.84281	1.81346	1.82627	1.72213	1.79106	1.86169	1.73848	1.70072	1.698	1.74929	1.76108	1.74334	1.87337	1.80438	1.87432	1.87781	1.85584	1.98048	1.90824	1.97258	2.01677	1.80044	1.94376	1.82632	1.76794	1.76936	1.81594	1.71479	1.31741	0.559025	0.409812	0.371092	0.42943	0.39144	0.348916	0.364761	0.355488	0.354503	0.372321	0.379001	0.396372	0.415793	0.444808	0.508638
Speed (Speed-mmpersec)	SS87269	AirLED6	20	1.65709	1.79941	1.80281	1.8732	1.75277	1.78841	1.77177	1.84119	1.81311	1.86188	1.83054	1.72265	1.7771	1.82414	1.85701	1.71885	1.68135	1.61658	1.78856	1.57319	1.64563	1.67918	1.71534	1.70432	1.69674	1.77725	1.81954	1.80282	1.71467	1.68227	1.33664	0.528126	0.387467	0.381724	0.365679	0.3596	0.35787	0.333589	0.332619	0.35474	0.344243	0.3497	0.357874	0.394083	0.422908	0.441257
Speed (Speed-mmpersec)	SS88801	AirLED1	19	1.65266	1.8829	1.78614	1.82045	1.88668	1.8763	1.86625	1.79068	1.77496	1.83389	1.89855	1.99684	1.97594	1.91528	2.06989	2.13074	2.06218	2.00645	1.99228	1.94709	1.72171	1.70023	1.77035	1.98606	2.11652	2.17666	2.33217	2.20017	2.29112	2.4183	1.997	1.01221	0.657439	0.615762	0.489518	0.505698	0.53104	0.521702	0.560549	0.535861	0.665316	0.853051	0.914735	0.970484	1.02346	1.27016
Speed (Speed-mmpersec)	SS88801	AirLED2	19	1.50383	1.72924	1.73758	1.78393	1.75848	1.70915	1.87357	1.78357	1.79862	1.81911	1.87138	1.82776	1.79145	1.82596	1.81945	1.70158	1.66665	1.61128	1.81663	1.79889	1.79029	1.76565	1.88842	1.74228	1.66256	1.73734	1.69576	1.79778	1.88696	1.81705	1.44288	0.688163	0.397393	0.464289	0.484049	0.467326	0.399442	0.398836	0.414061	0.463411	0.520336	0.602196	0.654646	0.846916	1.00344	1.08989
Speed (Speed-mmpersec)	SS88801	AirLED3	19	1.65443	1.81621	1.70944	1.86823	1.75387	1.68896	1.78835	1.79333	1.59334	1.54458	1.68859	1.5626	1.49721	1.63351	1.7484	1.70013	1.7428	1.69565	1.81253	1.76311	1.74054	1.78304	1.73137	1.75685	1.8755	1.83834	1.97355	1.9064	1.85722	1.93015	1.43998	0.653989	0.355722	0.362008	0.406598	0.406236	0.402679	0.417973	0.432732	0.424527	0.496606	0.585328	0.628002	0.673407	0.783065	0.934479
Speed (Speed-mmpersec)	SS88801	AirLED4	20	1.69908	1.91949	1.9795	1.96706	1.85752	1.94123	1.89146	1.93668	1.95139	1.7751	1.70365	1.79977	1.73037	1.77539	1.77578	1.71145	1.76575	1.76746	1.86483	1.86412	1.85896	1.8115	1.77526	1.85911	1.80995	1.81582	1.65589	1.73271	1.8814	1.82669	1.66811	0.904971	0.633056	0.542438	0.406191	0.360522	0.337763	0.335951	0.350959	0.362753	0.408801	0.461237	0.520117	0.595054	0.704739	0.827491
Speed (Speed-mmpersec)	SS88801	AirLED5	20	1.45309	1.58116	1.6582	1.64507	1.61725	1.59974	1.62243	1.5807	1.5321	1.48655	1.43495	1.4355	1.31914	1.34587	1.31078	1.30805	1.35421	1.44177	1.3597	1.3483	1.35453	1.34552	1.39555	1.38294	1.42034	1.46236	1.47281	1.51851	1.41242	1.50389	1.39164	0.528667	0.319438	0.363568	0.319888	0.305931	0.321689	0.332221	0.324549	0.331926	0.371196	0.420779	0.490202	0.558459	0.670881	0.775162
Speed (Speed-mmpersec)	SS88801	AirLED6	20	1.5024	1.72434	1.7088	1.71358	1.74031	1.6936	1.69415	1.72076	1.657	1.67256	1.59384	1.51239	1.55257	1.63817	1.56085	1.59647	1.53433	1.52158	1.51722	1.51868	1.53886	1.60985	1.62111	1.65511	1.63618	1.60962	1.64107	1.56314	1.62881	1.53962	1.39775	0.668345	0.349967	0.353403	0.346796	0.341287	0.363623	0.351208	0.357533	0.390469	0.418426	0.458099	0.5255	0.602446	0.696729	0.757233
Speed (Speed-mmpersec)	SS88776	AirLED1	22	1.62867	1.76483	1.96946	2.0641	2.01485	1.97595	1.87164	1.90437	1.8357	1.90779	1.92939	1.88426	1.88608	1.9037	1.94593	1.97813	2.05996	2.01869	2.05557	1.98083	1.92636	1.85816	1.80559	1.86904	2.0004	1.92842	1.9284	1.9233	1.92559	2.03153	1.56196	0.770552	0.567832	0.507577	0.49674	0.5099	0.503147	0.510507	0.520558	0.550619	0.664724	0.686918	0.766744	0.832839	0.969269	0.980902
Speed (Speed-mmpersec)	SS88776	AirLED2	22	1.67898	1.9092	1.87413	1.79817	1.74727	1.71266	1.71847	1.80592	1.76618	1.85441	1.87028	1.84059	1.84187	1.94779	1.97398	1.90302	1.9433	1.80595	1.81609	1.88402	1.88015	1.86019	1.78412	1.76378	1.76753	1.86038	1.91179	1.91081	1.79835	1.78105	1.44356	0.696984	0.3969	0.411068	0.425821	0.450744	0.417668	0.424534	0.413493	0.482263	0.517194	0.576522	0.718958	0.79389	0.877058	0.995428
Speed (Speed-mmpersec)	SS88776	AirLED3	22	1.53852	1.71172	1.70389	1.6894	1.78719	1.72371	1.74913	1.7608	1.78386	1.84387	1.94211	1.91235	1.86044	1.91193	1.91024	1.85659	1.78948	1.78518	1.76245	1.8082	1.91208	1.98461	1.77781	1.90429	1.86304	1.91001	1.84435	1.73657	1.76634	1.7286	1.48856	0.653605	0.370541	0.387812	0.44638	0.425686	0.401341	0.411941	0.426216	0.449933	0.486835	0.540961	0.615935	0.696933	0.797009	0.829144
Speed (Speed-mmpersec)	SS88776	AirLED4	22	1.76388	1.93709	1.83305	1.61269	1.63737	1.77581	1.71709	1.79088	1.74584	1.70988	1.68654	1.67365	1.71075	1.76962	1.75734	1.7334	1.81317	1.79059	1.74549	1.66635	1.70959	1.65914	1.71317	1.76356	1.73401	1.74373	1.71478	1.77588	1.79796	1.86628	1.30902	0.626477	0.36301	0.402317	0.404855	0.395921	0.386247	0.358955	0.382647	0.403489	0.452115	0.464631	0.527369	0.617139	0.661772	0.79178
Speed (Speed-mmpersec)	SS88776	AirLED5	22	1.56444	1.74109	1.66447	1.65706	1.63791	1.59387	1.61361	1.66346	1.58607	1.74143	1.66372	1.62878	1.68148	1.68921	1.78716	1.62877	1.69468	1.62722	1.66715	1.631	1.7123	1.6804	1.69335	1.72925	1.73188	1.5916	1.554	1.59556	1.58233	1.50152	1.20881	0.596894	0.397223	0.3459	0.368993	0.352384	0.350737	0.337589	0.361706	0.416052	0.48053	0.481577	0.50526	0.61799	0.69543	0.69304
Speed (Speed-mmpersec)	SS88776	AirLED6	22	1.35354	1.54262	1.49269	1.54888	1.64448	1.70753	1.65376	1.56352	1.56801	1.65118	1.74607	1.67777	1.63089	1.67908	1.66497	1.65784	1.66844	1.58286	1.54432	1.6243	1.68274	1.74708	1.66423	1.55267	1.59675	1.69658	1.68498	1.76828	1.79827	1.68715	1.29423	0.580371	0.441064	0.456562	0.423519	0.343779	0.353599	0.353855	0.354436	0.376526	0.407167	0.471269	0.527965	0.575546	0.659455	0.704842
Speed (Speed-mmpersec)	SS87272	AirLED1	25	1.38553	1.60193	1.57445	1.46925	1.52338	1.42865	1.41547	1.33631	1.48894	1.44771	1.44002	1.55302	1.56083	1.45051	1.47673	1.55019	1.45819	1.41611	1.37012	1.44426	1.39735	1.37979	1.40637	1.36312	1.32551	1.34956	1.56226	1.55588	1.52511	1.50126	1.43027	0.825713	0.472613	0.513214	0.552457	0.583676	0.710769	0.834679	0.992948	1.14479	1.29935	1.43673	1.44925	1.52537	1.69441	1.77755
Speed (Speed-mmpersec)	SS87272	AirLED2	25	1.33216	1.48597	1.48489	1.42601	1.44838	1.48774	1.47415	1.41698	1.29239	1.37618	1.36892	1.28264	1.42397	1.33099	1.30231	1.30352	1.23417	1.32818	1.26535	1.22015	1.33167	1.35202	1.33917	1.31795	1.34645	1.38594	1.42875	1.34074	1.35201	1.40127	1.34815	0.896001	0.487837	0.425089	0.475485	0.562637	0.686093	0.844047	1.01888	1.11957	1.19118	1.3368	1.44176	1.5362	1.59081	1.66945
Speed (Speed-mmpersec)	SS87272	AirLED3	24	1.17614	1.34976	1.43279	1.31132	1.35696	1.35902	1.35984	1.33313	1.24186	1.26232	1.36856	1.39852	1.29487	1.14077	1.18815	1.3048	1.2358	1.30014	1.22023	1.35917	1.36373	1.35562	1.31519	1.35798	1.30099	1.25074	1.33235	1.35674	1.3169	1.18313	1.1253	0.746258	0.444506	0.457177	0.483808	0.539444	0.595487	0.76541	0.938571	1.10458	1.13557	1.17674	1.30343	1.35792	1.44587	1.5479
Speed (Speed-mmpersec)	SS87272	AirLED4	25	1.06415	1.27875	1.19124	1.26087	1.20667	1.15307	1.19962	1.18533	1.22025	1.2502	1.30538	1.27702	1.31115	1.29173	1.22139	1.24616	1.24772	1.26249	1.25405	1.3803	1.32484	1.25692	1.17537	1.12187	1.12514	1.29865	1.25441	1.28325	1.19776	1.18454	1.04741	0.730223	0.469543	0.414786	0.38725	0.416993	0.494686	0.618942	0.791253	0.936686	1.11967	1.19763	1.2612	1.41952	1.36617	1.45781
Speed (Speed-mmpersec)	SS87272	AirLED5	25	1.00569	1.14701	1.19334	1.32432	1.2056	1.18616	1.22765	1.27123	1.23002	1.11217	1.1802	1.16902	1.14696	1.11334	1.11095	1.21653	1.22399	1.24378	1.28368	1.31763	1.27197	1.22091	1.22101	1.2132	1.21663	1.19944	1.21312	1.33331	1.30476	1.26897	1.19722	0.706029	0.386721	0.397029	0.415209	0.463569	0.549685	0.661682	0.756812	0.908613	1.03943	1.04445	1.15226	1.21086	1.36292	1.38413
Speed (Speed-mmpersec)	SS87272	AirLED6	25	1.17669	1.37899	1.32195	1.29088	1.28032	1.24394	1.2687	1.2711	1.32355	1.30689	1.32311	1.39554	1.40392	1.41268	1.34332	1.29091	1.26425	1.24775	1.17135	1.27959	1.25605	1.24558	1.19709	1.17514	1.20266	1.25683	1.26562	1.28494	1.32481	1.23116	1.24604	0.78495	0.493542	0.445085	0.45628	0.491168	0.544107	0.649372	0.801192	0.963558	1.09038	1.22484	1.42984	1.56043	1.56371	1.64381
Speed (Speed-mmpersec)	SS87279	AirLED1	19	1.69562	1.80177	1.71414	1.73435	1.90921	1.92961	1.82012	1.88292	1.71642	1.79275	1.80385	1.7714	1.72705	1.77438	1.74985	1.65206	1.54789	1.5499	1.56229	1.59526	1.50847	1.52539	1.44426	1.46895	1.61396	1.5097	1.4754	1.47071	1.70584	1.72923	1.5765	1.39296	1.22671	1.18517	1.32873	1.45996	1.71235	1.92397	2.1532	2.22486	2.13885	2.27883	2.24578	2.37387	2.22757	2.23892
Speed (Speed-mmpersec)	SS87279	AirLED2	19	1.20243	1.36314	1.29844	1.33018	1.41639	1.26561	1.2892	1.33019	1.2617	1.29966	1.25854	1.3098	1.25981	1.30054	1.37041	1.31	1.22802	1.36785	1.35569	1.38145	1.33878	1.45883	1.47843	1.36187	1.27056	1.25632	1.31668	1.3245	1.43048	1.36257	1.42912	1.7725	1.89941	2.03786	2.18743	2.16649	2.10406	2.20755	2.21081	2.24822	2.40876	2.49206	2.44114	2.4311	2.5111	2.41691
Speed (Speed-mmpersec)	SS87279	AirLED3	20	0.830443	0.880869	0.884014	0.896773	0.925034	0.824967	0.892419	0.971889	0.884191	0.876775	0.948917	0.906651	0.851054	0.9259	0.98952	0.966352	0.899849	0.876793	1.03962	1.0029	0.901273	0.890561	0.871615	0.801089	0.825619	0.800379	0.899199	0.916992	1.02019	1.05089	1.15244	1.32546	1.57302	1.70093	1.76151	1.80141	1.85066	1.97893	2.0148	1.98355	1.82165	1.92162	1.9031	1.88552	1.92363	2.00471
Speed (Speed-mmpersec)	SS87279	AirLED4	20	0.517712	0.597719	0.552487	0.559106	0.592252	0.577598	0.585622	0.532781	0.616791	0.661016	0.615722	0.650891	0.639372	0.567634	0.603133	0.569105	0.554028	0.632748	0.581672	0.59928	0.531059	0.538339	0.601472	0.63476	0.571739	0.639128	0.641742	0.618734	0.572988	0.576778	0.837643	1.50674	2.05964	2.20524	2.18765	2.08863	2.0742	1.96022	2.03238	2.03576	2.00094	2.17916	2.31014	2.3212	2.16387	2.21598
Speed (Speed-mmpersec)	SS87279	AirLED5	20	0.301733	0.352363	0.394244	0.414298	0.425157	0.473867	0.501952	0.513427	0.499504	0.478518	0.459644	0.459089	0.431851	0.434846	0.445596	0.440047	0.478294	0.516089	0.500873	0.506927	0.462377	0.418507	0.446678	0.475673	0.459154	0.492718	0.461007	0.473496	0.48149	0.498041	0.800373	1.58587	1.95486	2.05452	2.02387	1.97669	1.92235	1.74518	1.70618	1.72502	1.83599	1.80064	1.81861	1.685	1.83251	1.86854
Speed (Speed-mmpersec)	SS87279	AirLED6	20	0.307733	0.335867	0.386668	0.4408	0.420109	0.449304	0.466852	0.405273	0.385451	0.420475	0.449508	0.412024	0.410282	0.388711	0.45196	0.404914	0.402863	0.40102	0.458504	0.466498	0.414512	0.444946	0.49907	0.420121	0.397563	0.483187	0.458511	0.424462	0.4033	0.381653	0.776172	1.47566	1.94764	2.06802	1.99661	1.96823	2.00567	1.97589	1.89463	1.69163	1.73278	1.7785	1.82464	1.88337	1.86889	1.84595
Speed (Speed-mmpersec)	SS87278	AirLED1	16	1.78557	1.8947	1.79305	1.85689	2.06177	1.87737	1.92081	1.91793	2.03509	1.99112	2.03965	2.29571	1.78103	1.97242	1.87822	1.80389	1.78841	1.72054	1.74252	1.79354	2.06719	2.0013	1.93059	1.74706	1.936	1.94153	1.74444	1.76571	1.74902	1.99959	1.3536	0.976374	1.93465	2.47283	2.64733	2.60938	2.53219	2.37275	2.54556	2.5808	2.41588	2.38446	2.42929	2.51779	2.48893	2.55167
Speed (Speed-mmpersec)	SS87278	AirLED2	17	1.22725	1.42781	1.51902	1.56125	1.52437	1.58286	1.59363	1.39797	1.31796	1.31547	1.40111	1.53078	1.52145	1.55498	1.57705	1.54593	1.6289	1.60865	1.66812	1.59974	1.62975	1.60157	1.62036	1.53018	1.52262	1.529	1.60988	1.60101	1.45638	1.58503	1.40277	0.879019	1.55671	2.39788	2.21844	2.19485	2.25997	2.29932	2.12099	1.95163	2.07959	2.16639	2.03569	1.88536	1.63789	1.68373
Speed (Speed-mmpersec)	SS87278	AirLED3	17	1.28533	1.45458	1.37489	1.39568	1.36672	1.51878	1.42058	1.48792	1.48806	1.60887	1.59808	1.50979	1.55427	1.51597	1.4373	1.47899	1.42378	1.42702	1.40482	1.3998	1.43669	1.55228	1.55371	1.43431	1.42104	1.4849	1.46425	1.44341	1.41278	1.34596	1.21013	0.743457	1.42236	2.32628	2.32541	2.19702	2.1105	1.96487	2.04789	1.82522	1.81984	1.95523	1.96936	1.93386	2.07085	1.89394
Speed (Speed-mmpersec)	SS87278	AirLED4	17	1.16213	1.22533	1.3033	1.27333	1.15222	1.26541	1.26542	1.20488	1.26829	1.34799	1.30818	1.44465	1.39669	1.41616	1.41697	1.22911	1.2349	1.36017	1.27017	1.26912	1.2584	1.31664	1.2423	1.19531	1.13397	1.22833	1.27754	1.39948	1.28068	1.38302	1.03129	0.582528	1.32937	2.02259	2.16685	1.97581	1.70571	1.75748	1.83621	1.93681	2.0452	1.87578	1.84999	2.01901	1.76949	1.78828
Speed (Speed-mmpersec)	SS87278	AirLED5	17	1.25578	1.4266	1.34969	1.36458	1.35731	1.25583	1.35572	1.30315	1.35898	1.3501	1.28474	1.32098	1.25394	1.25761	1.2552	1.29709	1.30025	1.26487	1.2835	1.26938	1.17321	1.21001	1.20543	1.24914	1.4378	1.32486	1.30516	1.27299	1.24014	1.25995	1.10541	0.647699	1.05632	1.92813	2.04131	2.11521	2.01246	1.86571	1.83802	1.86634	1.85132	1.76879	1.66911	1.70783	1.68668	1.60057
Speed (Speed-mmpersec)	SS87278	AirLED6	16	1.14438	1.27753	1.12791	1.13949	1.19598	1.20104	1.11665	1.26235	1.14441	1.13907	1.14028	1.11922	1.18104	1.21707	1.14458	1.17691	1.20327	1.22526	1.21463	1.20442	1.09046	1.16491	1.18477	1.22285	1.16015	1.04231	0.954037	1.0918	0.997149	0.990885	0.958301	0.570155	0.922225	1.54999	1.55139	1.52106	1.62792	1.49701	1.54007	1.57952	1.48574	1.53653	1.49815	1.73076	1.5764	1.47849
				SEM
Data_Type	Male	Trial	GroupCount	sem_ 1	sem_ 2	sem_ 3	sem_ 4	sem_ 5	sem_ 6	sem_ 7	sem_ 8	sem_ 9	sem_10	sem_11	sem_12	sem_13	sem_14	sem_15	sem_16	sem_17	sem_18	sem_19	sem_20	sem_21	sem_22	sem_23	sem_24	sem_25	sem_26	sem_27	sem_28	sem_29	sem_30	sem_31	sem_32	sem_33	sem_34	sem_35	sem_36	sem_37	sem_38	sem_39	sem_40	sem_41	sem_42	sem_43	sem_44	sem_45	sem_46
Speed (Speed-mmpersec)	Gr64fGAL4	AirLED1	24	0.0898616	0.0839656	0.0952114	0.0765687	0.0823189	0.0966516	0.0881073	0.102478	0.0847734	0.0726069	0.0686181	0.0745434	0.0676463	0.0656987	0.0764176	0.0828507	0.0864207	0.078965	0.0765076	0.0732452	0.0683802	0.0752287	0.0641563	0.0701749	0.0800111	0.0712722	0.0670907	0.0720492	0.0690648	0.104299	0.102917	0.0819414	0.0348117	0.0312517	0.0261389	0.0194635	0.0231396	0.0183064	0.0207518	0.0231704	0.0193369	0.0207103	0.0229497	0.021707	0.0167414	0.0222025
Speed (Speed-mmpersec)	Gr64fGAL4	AirLED2	24	0.0472668	0.0480872	0.0707292	0.0529801	0.0589048	0.0505756	0.0521563	0.0422255	0.0453721	0.0760173	0.0643634	0.0463942	0.0755603	0.0625535	0.0591553	0.052394	0.0737488	0.0578988	0.0834584	0.061131	0.0580794	0.0566158	0.0666149	0.0356243	0.0413085	0.0533085	0.0514288	0.0549815	0.0595751	0.0520553	0.0629797	0.0569481	0.0309418	0.0271181	0.0444809	0.0269542	0.0162877	0.0143523	0.019493	0.0311478	0.0344658	0.0300317	0.0312159	0.0361986	0.0361605	0.0233072
Speed (Speed-mmpersec)	Gr64fGAL4	AirLED3	24	0.0746883	0.101974	0.0887279	0.0839294	0.0752031	0.0684583	0.0778722	0.0885388	0.07982	0.0769152	0.0629224	0.070041	0.0691916	0.0676946	0.0802799	0.0724838	0.0622793	0.0580765	0.0402919	0.0588582	0.0451227	0.0506974	0.0655474	0.0477703	0.0449167	0.0585179	0.0668387	0.0730244	0.0555528	0.0663942	0.0898155	0.080795	0.07676	0.0649072	0.0353404	0.0299493	0.025613	0.0217784	0.0251528	0.0236865	0.0264845	0.023978	0.0359194	0.0361431	0.0196397	0.0227053
Speed (Speed-mmpersec)	Gr64fGAL4	AirLED4	24	0.0577466	0.0634825	0.060575	0.05949	0.0514095	0.0618535	0.0737288	0.0799322	0.0653453	0.0558819	0.0753666	0.0873498	0.0810492	0.0731184	0.0834095	0.0658648	0.0906804	0.0909208	0.0807066	0.0941995	0.0786281	0.0932543	0.0871261	0.0884019	0.0730608	0.0540683	0.0652109	0.0612253	0.0636458	0.0471113	0.0645268	0.0565266	0.0239408	0.0131201	0.0149195	0.0167788	0.0268482	0.0193677	0.0368293	0.0333344	0.0224984	0.0210027	0.0195186	0.0253843	0.018132	0.0152749
Speed (Speed-mmpersec)	Gr64fGAL4	AirLED5	24	0.0645767	0.0598945	0.063679	0.0636671	0.0490471	0.046545	0.0414347	0.0502185	0.0441331	0.0528062	0.0637179	0.0644586	0.0811968	0.0772723	0.0784886	0.0910905	0.107939	0.0990602	0.078946	0.0712366	0.0659575	0.0584496	0.0664344	0.0560697	0.0480276	0.0438221	0.0535544	0.058707	0.0586993	0.0711002	0.088007	0.0690946	0.0658266	0.053834	0.047149	0.0350679	0.0186031	0.0194109	0.0216169	0.0286415	0.0343781	0.0161317	0.0205446	0.0198236	0.0286947	0.0343602
Speed (Speed-mmpersec)	Gr64fGAL4	AirLED6	24	0.0367228	0.0545085	0.0464705	0.0397242	0.0503794	0.0576074	0.0565173	0.055257	0.0586382	0.0597192	0.0688849	0.077722	0.0918112	0.0618443	0.0536136	0.062714	0.0598082	0.0575899	0.0391481	0.0349456	0.0482441	0.0542727	0.0424145	0.0467401	0.0465478	0.0680095	0.0764494	0.059278	0.0575083	0.0504592	0.0496625	0.0501258	0.0297359	0.0498525	0.072819	0.0644483	0.0385153	0.0438714	0.0425183	0.0390001	0.0407377	0.0384461	0.0396717	0.0289186	0.0161978	0.0243451
Speed (Speed-mmpersec)	SS87269	AirLED1	18	0.213244	0.214959	0.182925	0.228093	0.222068	0.192291	0.177856	0.21117	0.207795	0.219883	0.243803	0.177194	0.144121	0.157117	0.192163	0.168579	0.200605	0.186639	0.212507	0.241579	0.115651	0.168827	0.210974	0.280267	0.145606	0.172162	0.232253	0.192078	0.186881	0.184853	0.194169	0.097185	0.0642149	0.0614874	0.0481046	0.0403759	0.0456249	0.0438227	0.03898	0.0434072	0.0435226	0.0473906	0.0771595	0.0617475	0.0624348	0.0618998
Speed (Speed-mmpersec)	SS87269	AirLED2	20	0.172477	0.206932	0.212911	0.214176	0.202013	0.227181	0.163178	0.178684	0.215812	0.18784	0.20655	0.17735	0.143823	0.130094	0.17683	0.165829	0.17544	0.115052	0.144916	0.14662	0.137943	0.160664	0.168548	0.149402	0.163808	0.145186	0.108861	0.122387	0.112574	0.183408	0.189376	0.111962	0.0955189	0.0963477	0.044019	0.0380642	0.0365934	0.0357255	0.0345301	0.0387895	0.0396763	0.0375121	0.0516937	0.0389377	0.0546114	0.0574915
Speed (Speed-mmpersec)	SS87269	AirLED3	20	0.102908	0.177846	0.159664	0.149246	0.17123	0.191446	0.187865	0.141598	0.158266	0.152854	0.144456	0.162959	0.156583	0.135594	0.148929	0.175076	0.156748	0.179363	0.148198	0.164943	0.131032	0.163034	0.175482	0.14631	0.158714	0.138649	0.112511	0.149947	0.173286	0.188129	0.139515	0.16243	0.176465	0.168059	0.061505	0.0304139	0.0543405	0.030962	0.0305099	0.0281969	0.025424	0.0261601	0.0371743	0.0361162	0.0325404	0.0429147
Speed (Speed-mmpersec)	SS87269	AirLED4	20	0.127416	0.125816	0.103366	0.135203	0.142824	0.145005	0.163341	0.122611	0.133664	0.134864	0.168049	0.165779	0.135813	0.175819	0.127749	0.129345	0.147088	0.151517	0.13582	0.150935	0.138171	0.159533	0.136855	0.167268	0.163545	0.162915	0.153306	0.185535	0.176477	0.149367	0.147333	0.0831566	0.070355	0.0690181	0.0520773	0.0420882	0.0547759	0.0276938	0.0182941	0.0160326	0.0243871	0.0201846	0.0224842	0.0235063	0.0269878	0.036669
Speed (Speed-mmpersec)	SS87269	AirLED5	20	0.164607	0.180722	0.14976	0.162871	0.161891	0.161413	0.186631	0.171766	0.140285	0.133089	0.134202	0.137501	0.141499	0.130921	0.170958	0.149644	0.148237	0.140846	0.1463	0.155604	0.145735	0.149899	0.13342	0.132147	0.170769	0.151402	0.149417	0.151547	0.16038	0.146359	0.128212	0.079321	0.0409824	0.0352643	0.040061	0.0290637	0.0227325	0.0240178	0.0237826	0.0238681	0.023609	0.0239768	0.0241696	0.0263137	0.0347459	0.0385922
Speed (Speed-mmpersec)	SS87269	AirLED6	20	0.107212	0.132066	0.138472	0.155277	0.149373	0.138119	0.152642	0.135878	0.107744	0.153761	0.134596	0.132118	0.138335	0.142555	0.147758	0.12864	0.127488	0.122645	0.133245	0.10409	0.0957762	0.109654	0.0968798	0.119729	0.119803	0.130233	0.148555	0.132362	0.14209	0.115062	0.148917	0.0657162	0.0406778	0.0391626	0.039733	0.0276977	0.0273853	0.028414	0.0244546	0.0306538	0.0226923	0.0182055	0.0185349	0.0250958	0.0288327	0.0293863
Speed (Speed-mmpersec)	SS88801	AirLED1	19	0.194657	0.203954	0.168621	0.178686	0.185663	0.216616	0.19669	0.191154	0.169622	0.160945	0.167372	0.171067	0.170737	0.137274	0.171386	0.183998	0.20057	0.189711	0.221068	0.187007	0.142635	0.166388	0.186452	0.175136	0.170539	0.155149	0.183908	0.144484	0.145471	0.163394	0.199836	0.193321	0.179456	0.134227	0.0439866	0.047035	0.0522191	0.0429534	0.05293	0.0386041	0.0697621	0.147326	0.114942	0.127066	0.120685	0.193412
Speed (Speed-mmpersec)	SS88801	AirLED2	19	0.16569	0.147054	0.161397	0.147905	0.139293	0.158395	0.158957	0.166195	0.15733	0.139372	0.156551	0.15752	0.179784	0.158681	0.154639	0.172634	0.16038	0.119918	0.135413	0.165792	0.149962	0.154148	0.170283	0.160602	0.161114	0.152098	0.12559	0.123616	0.128413	0.126156	0.145796	0.104454	0.0350981	0.0428816	0.0372845	0.0315848	0.0335692	0.0311988	0.0368432	0.0503724	0.0571447	0.0661834	0.0726812	0.0884972	0.104392	0.112571
Speed (Speed-mmpersec)	SS88801	AirLED3	19	0.0947143	0.0988586	0.15216	0.17233	0.111818	0.106122	0.121227	0.15094	0.100556	0.124363	0.113535	0.0987617	0.132984	0.162343	0.160586	0.162571	0.147366	0.130969	0.159554	0.153625	0.181254	0.138135	0.129273	0.108342	0.130559	0.0893789	0.125235	0.135228	0.131492	0.193475	0.156063	0.104839	0.0391536	0.0217365	0.0403054	0.0302325	0.0283035	0.0322124	0.0404998	0.0408138	0.0510368	0.059857	0.0554988	0.0658266	0.0797266	0.104842
Speed (Speed-mmpersec)	SS88801	AirLED4	20	0.162131	0.158747	0.165139	0.148078	0.129536	0.156779	0.144265	0.122036	0.121893	0.132148	0.122891	0.124416	0.103275	0.106869	0.110313	0.11162	0.110781	0.115062	0.0991157	0.128356	0.129707	0.134487	0.118583	0.115183	0.101073	0.120766	0.116895	0.105195	0.129973	0.144419	0.159483	0.148028	0.149931	0.104239	0.0469979	0.0323949	0.0180511	0.0141261	0.0180981	0.0209212	0.0307055	0.0453301	0.0638033	0.0689734	0.0838672	0.109748
Speed (Speed-mmpersec)	SS88801	AirLED5	20	0.11287	0.100021	0.118575	0.13337	0.104616	0.126251	0.147051	0.133377	0.122973	0.114262	0.116412	0.11193	0.107353	0.111767	0.126756	0.0935096	0.100962	0.113092	0.0965866	0.105156	0.124968	0.114398	0.106478	0.119136	0.111058	0.138253	0.142597	0.156875	0.15244	0.137927	0.153074	0.0715866	0.0300377	0.039161	0.0128477	0.0145388	0.0252617	0.0349313	0.0306314	0.0199585	0.0231379	0.0310639	0.0361938	0.0469388	0.0622675	0.0731188
Speed (Speed-mmpersec)	SS88801	AirLED6	20	0.111788	0.132561	0.120571	0.133808	0.150674	0.15009	0.103115	0.120827	0.119048	0.122675	0.107899	0.0977227	0.107456	0.116998	0.103033	0.0818457	0.0782806	0.0948321	0.102171	0.101464	0.105138	0.091678	0.10303	0.135776	0.111683	0.0997873	0.129744	0.136371	0.142171	0.0997668	0.104803	0.0955002	0.0329094	0.0351304	0.0308089	0.0230303	0.0309439	0.0274442	0.0284333	0.0276334	0.0306886	0.0326115	0.0401857	0.0500082	0.0638984	0.0742318
Speed (Speed-mmpersec)	SS88776	AirLED1	22	0.0999854	0.10595	0.143796	0.140971	0.131679	0.147323	0.119751	0.123642	0.12699	0.119729	0.095908	0.116092	0.112117	0.124772	0.110861	0.125639	0.121618	0.116134	0.134593	0.172811	0.134759	0.110676	0.101423	0.0910538	0.10342	0.0984799	0.0964301	0.0951186	0.118467	0.130115	0.122467	0.107502	0.082607	0.0609139	0.0379101	0.0362485	0.0355563	0.0439358	0.0463208	0.0419482	0.0599829	0.0586986	0.0705439	0.0739193	0.0933462	0.0877079
Speed (Speed-mmpersec)	SS88776	AirLED2	22	0.12544	0.120908	0.149027	0.119498	0.0930969	0.116786	0.119606	0.130312	0.102415	0.124769	0.144568	0.145656	0.134578	0.158807	0.152159	0.112633	0.133347	0.0908251	0.0892086	0.103107	0.0846064	0.0838034	0.0768335	0.0772014	0.0862988	0.0950799	0.095818	0.113896	0.103515	0.0820347	0.114365	0.0973173	0.0414384	0.0375847	0.0291663	0.0267516	0.0296619	0.0345689	0.0356967	0.0342997	0.0343467	0.047473	0.0578994	0.0561074	0.072837	0.0866754
Speed (Speed-mmpersec)	SS88776	AirLED3	22	0.0782073	0.0818179	0.0871491	0.0843645	0.103675	0.113768	0.100907	0.0957638	0.0982645	0.0910421	0.113161	0.091225	0.121478	0.130803	0.148935	0.153478	0.121371	0.111807	0.0982296	0.0763158	0.0932386	0.105197	0.105383	0.0980066	0.0969443	0.119165	0.0999678	0.0984681	0.0790881	0.0690901	0.129914	0.085685	0.0367146	0.0353436	0.0363723	0.0290081	0.0244314	0.0262875	0.0288142	0.0237391	0.0357275	0.0445881	0.0553258	0.0666812	0.0582765	0.0591636
Speed (Speed-mmpersec)	SS88776	AirLED4	22	0.129589	0.130322	0.116213	0.0946861	0.0811515	0.104688	0.100766	0.0813152	0.0806588	0.092336	0.101588	0.102662	0.12423	0.124411	0.105796	0.102411	0.115578	0.106592	0.103182	0.105327	0.117768	0.0929758	0.115066	0.110722	0.106102	0.119757	0.104089	0.114337	0.119748	0.110406	0.103422	0.0904202	0.0338067	0.034867	0.0338114	0.0276011	0.0272909	0.0276084	0.0324975	0.0269856	0.0332197	0.0272397	0.0330204	0.0431125	0.0421953	0.0586051
Speed (Speed-mmpersec)	SS88776	AirLED5	22	0.0994741	0.0873836	0.0626692	0.0796694	0.0842569	0.084402	0.0791739	0.0829798	0.0686514	0.0671168	0.0910538	0.0728193	0.0988413	0.0948731	0.0902089	0.0873054	0.0762822	0.0706589	0.0757543	0.0849943	0.0943384	0.079624	0.0790683	0.0844453	0.0922631	0.0987267	0.0852895	0.0894765	0.0847552	0.0648198	0.0912459	0.073464	0.0499709	0.0285334	0.0235127	0.0234472	0.0209631	0.0213264	0.0295847	0.0531493	0.076874	0.0514343	0.0464337	0.0729348	0.066048	0.0542805
Speed (Speed-mmpersec)	SS88776	AirLED6	22	0.113494	0.0971612	0.093173	0.0892547	0.094514	0.0880147	0.0946832	0.0960692	0.106683	0.0930818	0.10019	0.109386	0.119488	0.116321	0.0872841	0.088087	0.103352	0.0703264	0.088808	0.089185	0.100358	0.120253	0.112756	0.0794343	0.105043	0.113231	0.1102	0.109518	0.112906	0.103482	0.123029	0.078674	0.0619719	0.0537447	0.0384289	0.0213516	0.0216176	0.0212456	0.0239243	0.0201265	0.0274146	0.0361717	0.0439558	0.0514242	0.0608151	0.0637199
Speed (Speed-mmpersec)	SS87272	AirLED1	25	0.171346	0.201969	0.190009	0.166887	0.16774	0.149717	0.150868	0.136043	0.163448	0.149656	0.138823	0.166156	0.157152	0.15295	0.145161	0.159355	0.168624	0.142185	0.146201	0.167001	0.131302	0.129733	0.134718	0.132747	0.141313	0.140294	0.202403	0.1852	0.187202	0.190233	0.173971	0.124438	0.0411347	0.0367117	0.0463788	0.0511024	0.0735449	0.081484	0.100818	0.142099	0.132414	0.16559	0.132849	0.161757	0.192176	0.159153
Speed (Speed-mmpersec)	SS87272	AirLED2	25	0.136577	0.143273	0.15153	0.15338	0.161263	0.160567	0.154704	0.152647	0.11948	0.155543	0.137645	0.138281	0.154659	0.16037	0.142312	0.138139	0.122993	0.146138	0.130767	0.131651	0.165678	0.172597	0.151101	0.13272	0.149203	0.150167	0.157658	0.141456	0.147764	0.173459	0.163281	0.152156	0.0430597	0.0259387	0.0335272	0.0456314	0.0677731	0.104248	0.114465	0.121187	0.12269	0.151202	0.162291	0.162866	0.163056	0.16283
Speed (Speed-mmpersec)	SS87272	AirLED3	24	0.119179	0.113281	0.174749	0.149702	0.161002	0.173513	0.179674	0.17123	0.131563	0.136802	0.169218	0.163082	0.134744	0.107756	0.123246	0.129477	0.121328	0.14071	0.117733	0.15161	0.148769	0.150031	0.144316	0.157893	0.140501	0.13769	0.137628	0.13641	0.126932	0.0961097	0.0942806	0.133119	0.043784	0.0390658	0.0467812	0.0598578	0.0616188	0.0772969	0.093811	0.115289	0.119659	0.114441	0.134587	0.149188	0.164028	0.166057
Speed (Speed-mmpersec)	SS87272	AirLED4	25	0.100626	0.13053	0.135684	0.127412	0.114517	0.112487	0.112902	0.12123	0.121081	0.133355	0.129994	0.139853	0.147625	0.121701	0.116645	0.133151	0.1204	0.126246	0.120423	0.137086	0.145911	0.130603	0.123477	0.117988	0.119234	0.137925	0.129322	0.127562	0.120418	0.111261	0.108439	0.0975291	0.0516904	0.0318671	0.0233339	0.0276871	0.0342617	0.0585998	0.0792321	0.0974845	0.108947	0.121354	0.107109	0.131649	0.126335	0.124085
Speed (Speed-mmpersec)	SS87272	AirLED5	25	0.129136	0.141949	0.128462	0.164275	0.144575	0.119003	0.123216	0.131211	0.1359	0.105227	0.110091	0.113569	0.113684	0.125764	0.120729	0.137228	0.13879	0.14303	0.130148	0.158451	0.142983	0.140384	0.137554	0.116792	0.120217	0.109844	0.12403	0.142033	0.158191	0.157818	0.136753	0.105929	0.0314084	0.0264862	0.0275367	0.0328577	0.0440751	0.068179	0.0718747	0.0850365	0.0974237	0.103902	0.113806	0.111156	0.133429	0.120174
Speed (Speed-mmpersec)	SS87272	AirLED6	25	0.123012	0.121362	0.1093	0.105493	0.11864	0.128237	0.115504	0.0882154	0.117577	0.118086	0.108355	0.137114	0.148557	0.130032	0.121228	0.127451	0.126191	0.122423	0.1075	0.135081	0.150147	0.143199	0.138194	0.131373	0.140847	0.149176	0.134722	0.138163	0.130206	0.144706	0.13131	0.109174	0.0615466	0.0403811	0.0422706	0.0439103	0.0542603	0.0621042	0.0699065	0.0881749	0.102868	0.114816	0.11933	0.142588	0.14004	0.132428
Speed (Speed-mmpersec)	SS87279	AirLED1	19	0.272476	0.26812	0.240171	0.237523	0.299779	0.264882	0.272852	0.319867	0.249415	0.221701	0.236498	0.222128	0.217775	0.205008	0.224891	0.178115	0.157895	0.145155	0.196386	0.150739	0.15686	0.155078	0.182211	0.199387	0.173243	0.154387	0.155875	0.138982	0.181561	0.190035	0.181294	0.13157	0.0921949	0.143343	0.272565	0.309351	0.348946	0.370891	0.429285	0.435743	0.346983	0.337189	0.354123	0.35051	0.280154	0.30013
Speed (Speed-mmpersec)	SS87279	AirLED2	19	0.136704	0.170203	0.175126	0.174563	0.163473	0.1345	0.13373	0.161344	0.171102	0.163298	0.179709	0.187491	0.190666	0.208755	0.237404	0.215763	0.178523	0.203104	0.196922	0.181878	0.193011	0.235329	0.216335	0.216179	0.187482	0.162396	0.19944	0.200045	0.220682	0.202182	0.220262	0.321099	0.430335	0.418324	0.386501	0.374641	0.323465	0.308697	0.257849	0.265588	0.291868	0.261638	0.238749	0.214329	0.217044	0.244486
Speed (Speed-mmpersec)	SS87279	AirLED3	20	0.143183	0.160469	0.159423	0.157238	0.154771	0.147495	0.170857	0.172583	0.15153	0.155951	0.202867	0.176303	0.161304	0.145629	0.233422	0.201936	0.17094	0.182769	0.193404	0.182582	0.158673	0.17141	0.230317	0.175554	0.159062	0.144694	0.233482	0.179387	0.241263	0.237498	0.201038	0.277022	0.32874	0.350671	0.340744	0.340725	0.311698	0.294865	0.244473	0.233724	0.181002	0.162171	0.119416	0.110567	0.134663	0.164984
Speed (Speed-mmpersec)	SS87279	AirLED4	20	0.0512197	0.0643231	0.0623506	0.0512444	0.0753087	0.073162	0.0794454	0.0703004	0.0824284	0.0752606	0.0754703	0.0772162	0.0794012	0.0704447	0.0795261	0.0822956	0.0727718	0.0879706	0.0658504	0.0775913	0.066439	0.0787327	0.0795944	0.0723215	0.0668941	0.0987571	0.0893589	0.0892504	0.0744188	0.0888314	0.154872	0.297287	0.310822	0.32568	0.322476	0.289152	0.237633	0.208795	0.205359	0.208854	0.191372	0.224366	0.256747	0.219694	0.223494	0.217758
Speed (Speed-mmpersec)	SS87279	AirLED5	20	0.0582805	0.0699157	0.0785291	0.082795	0.0788685	0.0746962	0.0852202	0.0847891	0.0901759	0.0811023	0.081401	0.0795582	0.0886878	0.0805442	0.082465	0.0942217	0.084476	0.0891235	0.104655	0.120709	0.0874288	0.0893369	0.0912549	0.0726487	0.0833211	0.0923936	0.0818805	0.0859228	0.0814957	0.0858638	0.130961	0.274425	0.261702	0.267126	0.241222	0.261707	0.247385	0.191546	0.191501	0.190826	0.181485	0.182521	0.220714	0.179691	0.228435	0.223306
Speed (Speed-mmpersec)	SS87279	AirLED6	20	0.0700708	0.0797782	0.0872083	0.101838	0.098735	0.113938	0.0923648	0.0760887	0.0810801	0.0978281	0.108186	0.0838262	0.081796	0.101484	0.122225	0.0991682	0.0951171	0.0917042	0.106871	0.0844829	0.0880679	0.0852654	0.0992498	0.086243	0.0763698	0.0962108	0.0862769	0.0813835	0.0781634	0.067981	0.16582	0.238005	0.301944	0.285734	0.247039	0.249136	0.254237	0.226055	0.21523	0.171866	0.175308	0.200287	0.204052	0.197883	0.202934	0.174218
Speed (Speed-mmpersec)	SS87278	AirLED1	16	0.161305	0.222946	0.176236	0.180811	0.21239	0.184741	0.143436	0.180157	0.190021	0.208305	0.211583	0.266221	0.173255	0.213974	0.206351	0.189479	0.201753	0.148967	0.154837	0.164754	0.23791	0.252116	0.235981	0.186465	0.228002	0.208686	0.182151	0.183661	0.201539	0.213398	0.169957	0.0951896	0.318149	0.304582	0.343944	0.25603	0.198387	0.201162	0.255471	0.237782	0.229176	0.199416	0.208695	0.210551	0.179226	0.240568
Speed (Speed-mmpersec)	SS87278	AirLED2	17	0.128236	0.142815	0.154551	0.163076	0.15934	0.204838	0.202581	0.187125	0.189758	0.170702	0.196427	0.202109	0.195829	0.17626	0.202216	0.213163	0.168451	0.190259	0.208506	0.184251	0.16106	0.184708	0.189444	0.185994	0.188713	0.177701	0.211431	0.207672	0.179674	0.22335	0.236961	0.201095	0.268185	0.330624	0.232707	0.209528	0.245486	0.254102	0.252258	0.25113	0.242434	0.25428	0.234318	0.207969	0.188915	0.213421
Speed (Speed-mmpersec)	SS87278	AirLED3	17	0.181807	0.184351	0.158498	0.139999	0.164072	0.170421	0.154669	0.189973	0.14439	0.208222	0.246175	0.214156	0.219016	0.251366	0.202789	0.176458	0.192774	0.20284	0.215918	0.194533	0.194677	0.193794	0.173013	0.208928	0.209747	0.187137	0.186311	0.161617	0.163226	0.16666	0.167505	0.130663	0.223798	0.29874	0.273387	0.245072	0.258348	0.230912	0.226302	0.169916	0.194347	0.206872	0.229923	0.152886	0.193598	0.195812
Speed (Speed-mmpersec)	SS87278	AirLED4	17	0.147431	0.148051	0.142604	0.173357	0.164358	0.178372	0.160255	0.172719	0.18844	0.183167	0.179981	0.186733	0.189432	0.209575	0.164886	0.149229	0.171686	0.200784	0.146658	0.170172	0.169056	0.181395	0.176842	0.175794	0.153308	0.193879	0.214667	0.202023	0.207917	0.235318	0.145862	0.0884576	0.254715	0.245642	0.241291	0.222528	0.207349	0.187737	0.227237	0.234554	0.228505	0.199826	0.235464	0.244791	0.220728	0.239133
Speed (Speed-mmpersec)	SS87278	AirLED5	17	0.168273	0.177985	0.188425	0.181167	0.175575	0.169866	0.158082	0.162874	0.175778	0.133094	0.128489	0.129828	0.126364	0.160533	0.167932	0.18911	0.189724	0.176652	0.147009	0.15377	0.148568	0.175456	0.1534	0.14118	0.184597	0.161206	0.152791	0.129328	0.150588	0.1535	0.124366	0.0724268	0.176694	0.258133	0.245773	0.242675	0.222367	0.200079	0.224977	0.231484	0.169356	0.137121	0.14206	0.158303	0.177306	0.190918
Speed (Speed-mmpersec)	SS87278	AirLED6	16	0.151543	0.164801	0.158502	0.163374	0.159966	0.169924	0.152502	0.195657	0.152873	0.137702	0.152067	0.133318	0.13369	0.14445	0.107075	0.110393	0.139895	0.135608	0.151012	0.158214	0.130686	0.110243	0.151034	0.158589	0.139801	0.116359	0.110496	0.120168	0.0960415	0.113475	0.164481	0.0716871	0.167493	0.203156	0.219111	0.212104	0.196261	0.157172	0.191107	0.191956	0.192052	0.179186	0.177347	0.183259	0.178387	0.19036
				STD
Data_Type	Male	Trial	GroupCount	std_ 1	std_ 2	std_ 3	std_ 4	std_ 5	std_ 6	std_ 7	std_ 8	std_ 9	std_10	std_11	std_12	std_13	std_14	std_15	std_16	std_17	std_18	std_19	std_20	std_21	std_22	std_23	std_24	std_25	std_26	std_27	std_28	std_29	std_30	std_31	std_32	std_33	std_34	std_35	std_36	std_37	std_38	std_39	std_40	std_41	std_42	std_43	std_44	std_45	std_46
Speed (Speed-mmpersec)	Gr64fGAL4	AirLED1	24	0.44023	0.411346	0.466439	0.375109	0.403279	0.473494	0.431636	0.50204	0.415303	0.3557	0.336159	0.365187	0.331398	0.321856	0.374368	0.405884	0.423373	0.386848	0.374809	0.358827	0.334993	0.368544	0.3143	0.343785	0.391973	0.349161	0.328676	0.352968	0.338347	0.510958	0.504186	0.401429	0.170542	0.153102	0.128054	0.0953515	0.11336	0.0896827	0.101663	0.113511	0.0947313	0.101459	0.11243	0.106342	0.0820157	0.108769
Speed (Speed-mmpersec)	Gr64fGAL4	AirLED2	24	0.231559	0.235578	0.346501	0.259549	0.288573	0.247769	0.255513	0.206862	0.222277	0.372407	0.315315	0.227284	0.370168	0.306448	0.2898	0.256677	0.361294	0.283645	0.408861	0.29948	0.28453	0.27736	0.326345	0.174523	0.202369	0.261157	0.251949	0.269353	0.291857	0.255018	0.308536	0.278988	0.151583	0.132851	0.217911	0.132048	0.0797931	0.0703116	0.0954956	0.152592	0.168847	0.147125	0.152926	0.177336	0.177149	0.114181
Speed (Speed-mmpersec)	Gr64fGAL4	AirLED3	24	0.365897	0.499568	0.434676	0.411168	0.368418	0.335376	0.381495	0.43375	0.391037	0.376806	0.308255	0.34313	0.338968	0.331635	0.393289	0.355097	0.305105	0.284516	0.197389	0.288345	0.221055	0.248365	0.321115	0.234025	0.220046	0.286678	0.327441	0.357745	0.272152	0.325264	0.440004	0.395813	0.376046	0.317979	0.173132	0.146721	0.125477	0.106692	0.123223	0.11604	0.129747	0.117468	0.175968	0.177065	0.0962143	0.111233
Speed (Speed-mmpersec)	Gr64fGAL4	AirLED4	24	0.282899	0.311	0.296756	0.29144	0.251854	0.303019	0.361196	0.391586	0.320125	0.273764	0.369219	0.427925	0.397058	0.358206	0.408622	0.32267	0.444242	0.445419	0.39538	0.461482	0.385198	0.456851	0.426829	0.433079	0.357923	0.264879	0.319467	0.299942	0.311799	0.230797	0.316116	0.276923	0.117285	0.064275	0.0730903	0.082199	0.131529	0.0948821	0.180426	0.163304	0.110219	0.102892	0.0956211	0.124357	0.0888285	0.0748312
Speed (Speed-mmpersec)	Gr64fGAL4	AirLED5	24	0.31636	0.293422	0.311962	0.311904	0.240281	0.228023	0.202988	0.24602	0.216207	0.258696	0.312153	0.315781	0.397782	0.378555	0.384514	0.44625	0.528791	0.485294	0.386755	0.348987	0.323125	0.286343	0.325461	0.274684	0.235286	0.214684	0.262362	0.287604	0.287567	0.348318	0.431144	0.338493	0.322483	0.263732	0.230982	0.171797	0.091136	0.0950935	0.105901	0.140314	0.168417	0.079029	0.100648	0.0971152	0.140575	0.16833
Speed (Speed-mmpersec)	Gr64fGAL4	AirLED6	24	0.172245	0.255668	0.217966	0.186323	0.2363	0.270203	0.26509	0.259178	0.275038	0.280108	0.323099	0.364549	0.430632	0.290076	0.25147	0.294155	0.280525	0.27012	0.183621	0.163909	0.226285	0.254562	0.198942	0.21923	0.218329	0.318993	0.35858	0.278038	0.269738	0.236674	0.232938	0.235111	0.139474	0.233829	0.341552	0.30229	0.180653	0.205775	0.199428	0.182927	0.191077	0.180328	0.186077	0.13564	0.0759744	0.114189
Speed (Speed-mmpersec)	SS87269	AirLED1	18	0.852977	0.859835	0.7317	0.912372	0.888273	0.769165	0.711423	0.844678	0.83118	0.879533	0.975211	0.708775	0.576483	0.628468	0.768652	0.674315	0.802421	0.746554	0.850026	0.966317	0.462605	0.675309	0.843898	1.12107	0.582423	0.688646	0.929012	0.76831	0.747526	0.739411	0.776677	0.38874	0.25686	0.245949	0.192418	0.161504	0.1825	0.175291	0.15592	0.173629	0.17409	0.189562	0.308638	0.24699	0.249739	0.247599
Speed (Speed-mmpersec)	SS87269	AirLED2	20	0.751809	0.901997	0.928057	0.933573	0.880555	0.990258	0.711275	0.778867	0.940703	0.818775	0.900331	0.773049	0.626911	0.567067	0.770782	0.722832	0.764727	0.501499	0.631674	0.639102	0.601279	0.700316	0.734685	0.651227	0.714024	0.632852	0.474516	0.533471	0.490699	0.799458	0.825472	0.488033	0.416357	0.41997	0.191874	0.165918	0.159507	0.155724	0.150513	0.16908	0.172945	0.163512	0.225328	0.169725	0.238046	0.2506
Speed (Speed-mmpersec)	SS87269	AirLED3	20	0.460221	0.795352	0.71404	0.667449	0.765764	0.856173	0.84016	0.633245	0.707787	0.683586	0.646027	0.728774	0.70026	0.606394	0.666033	0.782964	0.701	0.802136	0.662761	0.737645	0.585994	0.72911	0.784778	0.654316	0.709791	0.620059	0.503166	0.670583	0.774958	0.841338	0.623929	0.726408	0.789176	0.751585	0.275059	0.136015	0.243018	0.138466	0.136445	0.1261	0.1137	0.116992	0.166248	0.161517	0.145525	0.191921
Speed (Speed-mmpersec)	SS87269	AirLED4	20	0.569823	0.562668	0.462266	0.604645	0.638728	0.64848	0.730483	0.548333	0.597762	0.60313	0.751536	0.741387	0.607372	0.786285	0.57131	0.578448	0.657799	0.677604	0.607408	0.675	0.617919	0.713452	0.612034	0.748047	0.731395	0.728578	0.685607	0.829737	0.789231	0.667992	0.658893	0.371888	0.314637	0.308659	0.232897	0.188224	0.244965	0.12385	0.0818135	0.0716998	0.109062	0.0902682	0.100552	0.105123	0.120693	0.163989
Speed (Speed-mmpersec)	SS87269	AirLED5	20	0.736145	0.808212	0.669749	0.728381	0.723997	0.721862	0.834638	0.768162	0.627375	0.59519	0.600171	0.614925	0.632803	0.585497	0.764548	0.669227	0.662937	0.629882	0.654275	0.695882	0.651745	0.670367	0.596672	0.590981	0.7637	0.677089	0.668214	0.677738	0.717242	0.654536	0.573381	0.354734	0.183279	0.157707	0.179158	0.129977	0.101663	0.107411	0.106359	0.106741	0.105583	0.107228	0.10809	0.117679	0.155388	0.172589
Speed (Speed-mmpersec)	SS87269	AirLED6	20	0.479468	0.590618	0.619264	0.694422	0.668015	0.617688	0.682636	0.607667	0.481845	0.687642	0.601931	0.590851	0.618651	0.637525	0.660795	0.575295	0.570142	0.548487	0.595889	0.465506	0.428324	0.490388	0.43326	0.535445	0.535775	0.582418	0.664359	0.591939	0.635448	0.514575	0.665976	0.293892	0.181917	0.17514	0.177691	0.123868	0.122471	0.127071	0.109364	0.137088	0.101483	0.0814177	0.0828908	0.112232	0.128944	0.131419
Speed (Speed-mmpersec)	SS88801	AirLED1	19	0.825858	0.865304	0.715399	0.758102	0.787701	0.919023	0.834487	0.810996	0.719645	0.68283	0.710097	0.725774	0.724377	0.582405	0.727131	0.780638	0.850948	0.804876	0.937911	0.793402	0.605151	0.705925	0.791049	0.743039	0.723534	0.658243	0.780256	0.612993	0.61718	0.693223	0.847833	0.82019	0.761368	0.569476	0.186619	0.199553	0.221547	0.182236	0.224563	0.163783	0.295976	0.625052	0.487659	0.539095	0.512021	0.820578
Speed (Speed-mmpersec)	SS88801	AirLED2	19	0.702965	0.623899	0.684752	0.627509	0.590972	0.672014	0.674399	0.705106	0.667496	0.591305	0.664188	0.668301	0.762758	0.673225	0.656076	0.732425	0.680436	0.50877	0.574507	0.703394	0.636234	0.653995	0.72245	0.681375	0.683547	0.645299	0.532833	0.524459	0.544809	0.535233	0.61856	0.443161	0.148909	0.181931	0.158185	0.134003	0.142422	0.132365	0.156312	0.213712	0.242444	0.280792	0.30836	0.375462	0.442898	0.477597
Speed (Speed-mmpersec)	SS88801	AirLED3	19	0.378857	0.395435	0.608642	0.689322	0.447272	0.424488	0.48491	0.603759	0.402222	0.497451	0.454141	0.395047	0.531938	0.649373	0.642345	0.650284	0.589463	0.523874	0.638214	0.614498	0.725015	0.552541	0.517094	0.433367	0.522234	0.357516	0.500942	0.540912	0.525967	0.773901	0.624252	0.419355	0.156615	0.086946	0.161221	0.12093	0.113214	0.12885	0.161999	0.163255	0.204147	0.239428	0.221995	0.263307	0.318906	0.419369
Speed (Speed-mmpersec)	SS88801	AirLED4	20	0.706713	0.691961	0.719826	0.645459	0.564634	0.683383	0.628835	0.531942	0.53132	0.576019	0.535671	0.542317	0.450163	0.465833	0.480844	0.486541	0.482882	0.501546	0.432036	0.559489	0.565378	0.586216	0.51689	0.502072	0.440566	0.526408	0.509534	0.458533	0.56654	0.629506	0.695171	0.645241	0.653534	0.454369	0.204859	0.141206	0.078683	0.0615742	0.0788879	0.0911936	0.133842	0.197589	0.278112	0.300648	0.365569	0.478381
Speed (Speed-mmpersec)	SS88801	AirLED5	20	0.45148	0.400084	0.4743	0.533482	0.418466	0.505005	0.588203	0.533507	0.491891	0.457049	0.46565	0.447722	0.429413	0.447069	0.507026	0.374039	0.403846	0.452367	0.386346	0.420625	0.499872	0.457592	0.425912	0.476544	0.44423	0.553013	0.57039	0.627499	0.609762	0.551707	0.612297	0.286346	0.120151	0.156644	0.051391	0.0581552	0.101047	0.139725	0.122526	0.0798338	0.0925515	0.124256	0.144775	0.187755	0.24907	0.292475
Speed (Speed-mmpersec)	SS88801	AirLED6	20	0.499932	0.592829	0.539211	0.598406	0.673836	0.671225	0.461145	0.540353	0.532398	0.548621	0.482538	0.437029	0.480559	0.52323	0.460778	0.366025	0.350081	0.424102	0.456922	0.453759	0.470192	0.409996	0.460764	0.607207	0.499461	0.446262	0.580231	0.609871	0.63581	0.446171	0.468695	0.42709	0.147175	0.157108	0.137782	0.102995	0.138386	0.122734	0.127158	0.12358	0.137244	0.145843	0.179716	0.223644	0.285762	0.331975
Speed (Speed-mmpersec)	SS88776	AirLED1	22	0.468973	0.496952	0.674463	0.661211	0.61763	0.691008	0.56168	0.579934	0.595638	0.56158	0.449849	0.544519	0.525874	0.585234	0.519982	0.589297	0.570439	0.544717	0.631299	0.810557	0.632074	0.519118	0.475718	0.42708	0.485084	0.461912	0.452297	0.446146	0.555659	0.610292	0.574422	0.504231	0.387461	0.285712	0.177814	0.170021	0.166774	0.206077	0.217264	0.196755	0.281345	0.275321	0.33088	0.346712	0.437833	0.411386
Speed (Speed-mmpersec)	SS88776	AirLED2	22	0.588363	0.56711	0.698996	0.560496	0.436663	0.547776	0.561003	0.611219	0.480369	0.585218	0.678086	0.683189	0.631228	0.744872	0.71369	0.528297	0.625454	0.426007	0.418426	0.483614	0.396839	0.393073	0.360381	0.362107	0.404777	0.445964	0.449426	0.534218	0.485527	0.384777	0.53642	0.456458	0.194363	0.176288	0.136802	0.125476	0.139127	0.162143	0.167432	0.16088	0.1611	0.222668	0.271572	0.263167	0.341636	0.406544
Speed (Speed-mmpersec)	SS88776	AirLED3	22	0.358391	0.374937	0.399367	0.386607	0.475096	0.521348	0.462412	0.438845	0.450305	0.417207	0.51857	0.418045	0.556681	0.599416	0.682508	0.703326	0.55619	0.512364	0.450145	0.349723	0.427273	0.482075	0.482926	0.449123	0.444254	0.546084	0.45811	0.451238	0.362427	0.316611	0.595339	0.392658	0.168248	0.161965	0.166679	0.132932	0.111959	0.120464	0.132043	0.108786	0.163724	0.204328	0.253535	0.305572	0.267057	0.271122
Speed (Speed-mmpersec)	SS88776	AirLED4	22	0.607824	0.611265	0.545087	0.444117	0.380634	0.49103	0.472636	0.381402	0.378323	0.433094	0.476489	0.481529	0.582691	0.583538	0.496226	0.480352	0.542107	0.499963	0.483965	0.494026	0.552383	0.436095	0.539705	0.519334	0.497661	0.56171	0.488219	0.53629	0.561668	0.51785	0.48509	0.424108	0.158568	0.163541	0.15859	0.129461	0.128006	0.129495	0.152427	0.126573	0.155814	0.127766	0.154879	0.202215	0.197914	0.274882
Speed (Speed-mmpersec)	SS88776	AirLED5	22	0.466575	0.409865	0.293945	0.373683	0.3952	0.39588	0.371359	0.38921	0.322004	0.314806	0.42708	0.341553	0.463607	0.444994	0.423117	0.409499	0.357795	0.33142	0.355319	0.398659	0.442486	0.37347	0.370863	0.396083	0.432752	0.463069	0.400043	0.419682	0.397537	0.304032	0.427981	0.344577	0.234384	0.133834	0.110284	0.109977	0.0983256	0.10003	0.138765	0.249292	0.360571	0.241248	0.217793	0.342094	0.309792	0.254598
Speed (Speed-mmpersec)	SS88776	AirLED6	22	0.507559	0.434518	0.416682	0.399159	0.422679	0.393614	0.423436	0.429634	0.477103	0.416274	0.448062	0.489188	0.534366	0.520205	0.390346	0.393937	0.462205	0.314509	0.397161	0.398848	0.448814	0.537788	0.50426	0.355241	0.469768	0.506383	0.492829	0.48978	0.504932	0.462785	0.550201	0.351841	0.277147	0.240353	0.171859	0.0954871	0.0966768	0.0950134	0.106993	0.0900084	0.122602	0.161765	0.196576	0.229976	0.271973	0.284964
Speed (Speed-mmpersec)	SS87272	AirLED1	25	0.821747	0.968608	0.911252	0.800364	0.804455	0.718017	0.723537	0.652438	0.783871	0.717727	0.66577	0.796857	0.753673	0.733525	0.696168	0.764239	0.808694	0.681898	0.701154	0.80091	0.629702	0.622176	0.646087	0.636632	0.677713	0.672826	0.97069	0.888188	0.897789	0.912324	0.834338	0.596782	0.197275	0.176063	0.222425	0.245078	0.352709	0.390783	0.483505	0.681481	0.635033	0.79414	0.637121	0.775757	0.921643	0.763273
Speed (Speed-mmpersec)	SS87272	AirLED2	25	0.669086	0.70189	0.742342	0.751406	0.790023	0.786617	0.75789	0.747813	0.585332	0.762	0.674318	0.677436	0.757669	0.78565	0.697185	0.676739	0.602541	0.715927	0.640624	0.644953	0.811651	0.845547	0.740243	0.650193	0.730944	0.735664	0.772364	0.692992	0.723895	0.849774	0.799911	0.745409	0.210949	0.127073	0.164249	0.223547	0.332019	0.510708	0.560764	0.593693	0.601056	0.740736	0.79506	0.797876	0.798807	0.797702
Speed (Speed-mmpersec)	SS87272	AirLED3	24	0.583854	0.554963	0.856094	0.733387	0.788747	0.850035	0.880221	0.83885	0.644524	0.670192	0.828996	0.798937	0.660108	0.527892	0.603778	0.634306	0.594385	0.689335	0.576772	0.742734	0.728817	0.735001	0.707003	0.773512	0.68831	0.674541	0.674238	0.668272	0.621839	0.47084	0.461879	0.652149	0.214497	0.191383	0.22918	0.293242	0.301869	0.378676	0.459578	0.564798	0.586205	0.560645	0.659338	0.730868	0.80357	0.813511
Speed (Speed-mmpersec)	SS87272	AirLED4	25	0.482586	0.625998	0.650719	0.611045	0.549202	0.539468	0.541457	0.581397	0.580683	0.639548	0.623427	0.670713	0.707985	0.583658	0.559411	0.638571	0.577418	0.605456	0.57753	0.657442	0.699763	0.626351	0.592174	0.565851	0.571826	0.661464	0.620205	0.611767	0.577503	0.533591	0.520054	0.467733	0.247899	0.152829	0.111906	0.132783	0.164313	0.281035	0.379984	0.467519	0.522493	0.581994	0.513675	0.631366	0.60588	0.59509
Speed (Speed-mmpersec)	SS87272	AirLED5	25	0.591775	0.650493	0.588686	0.752802	0.662527	0.545341	0.564645	0.601283	0.622774	0.482211	0.504501	0.52044	0.520965	0.576324	0.553249	0.628858	0.636017	0.655447	0.596415	0.726113	0.65523	0.643321	0.630349	0.535209	0.550906	0.503367	0.568377	0.650876	0.724921	0.723213	0.626683	0.485427	0.143932	0.121375	0.126189	0.150573	0.201977	0.312436	0.329371	0.389686	0.446451	0.47614	0.521524	0.509383	0.611448	0.550709
Speed (Speed-mmpersec)	SS87272	AirLED6	25	0.576979	0.569237	0.512663	0.494807	0.556473	0.601485	0.54176	0.413767	0.551483	0.553872	0.50823	0.643123	0.696792	0.609903	0.568608	0.597799	0.591888	0.574213	0.50422	0.633588	0.70425	0.671662	0.648189	0.616196	0.660629	0.699698	0.631903	0.648042	0.61072	0.678733	0.6159	0.512073	0.288679	0.189404	0.198267	0.205957	0.254503	0.291294	0.327891	0.413577	0.482495	0.538533	0.559705	0.668795	0.656847	0.621143
Speed (Speed-mmpersec)	SS87279	AirLED1	19	1.0553	1.03843	0.930177	0.919925	1.16104	1.02588	1.05675	1.23884	0.96598	0.858644	0.915955	0.860297	0.84344	0.793994	0.870998	0.689835	0.611525	0.562183	0.760598	0.583808	0.607518	0.600615	0.705701	0.772223	0.670965	0.597937	0.603703	0.538274	0.703184	0.736002	0.70215	0.509568	0.357069	0.555166	1.05564	1.19811	1.35146	1.43646	1.66261	1.68763	1.34386	1.30593	1.37151	1.35752	1.08503	1.1624
Speed (Speed-mmpersec)	SS87279	AirLED2	19	0.563644	0.701765	0.722062	0.719741	0.674016	0.554556	0.551383	0.665236	0.705472	0.673295	0.740958	0.773046	0.786134	0.86072	0.978843	0.889612	0.736069	0.837421	0.811931	0.7499	0.795806	0.970286	0.891973	0.89133	0.773008	0.669577	0.822313	0.824808	0.909894	0.833616	0.908161	1.32392	1.77432	1.72479	1.59359	1.54468	1.33368	1.27279	1.06314	1.09505	1.2034	1.07876	0.984386	0.883702	0.894896	1.00804
Speed (Speed-mmpersec)	SS87279	AirLED3	20	0.572734	0.641875	0.637693	0.62895	0.619083	0.589979	0.683427	0.690331	0.60612	0.623803	0.81147	0.705212	0.645214	0.582517	0.933687	0.807742	0.683762	0.731075	0.773617	0.730327	0.63469	0.685639	0.92127	0.702214	0.636247	0.578775	0.933927	0.717548	0.965052	0.949992	0.804152	1.10809	1.31496	1.40268	1.36298	1.3629	1.24679	1.17946	0.977892	0.934897	0.724007	0.648683	0.477665	0.442266	0.538653	0.659936
Speed (Speed-mmpersec)	SS87279	AirLED4	20	0.211184	0.265211	0.257078	0.211286	0.310506	0.301655	0.327562	0.289856	0.339861	0.310307	0.311172	0.31837	0.327379	0.290451	0.327895	0.339314	0.300046	0.362712	0.271508	0.319917	0.273935	0.324623	0.328176	0.298189	0.275812	0.407186	0.368436	0.367989	0.306837	0.366261	0.638553	1.22574	1.28155	1.34281	1.3296	1.1922	0.979787	0.860882	0.846718	0.861126	0.789047	0.925086	1.0586	0.905823	0.921491	0.897839
Speed (Speed-mmpersec)	SS87279	AirLED5	20	0.233122	0.279663	0.314117	0.33118	0.315474	0.298785	0.340881	0.339156	0.360704	0.324409	0.325604	0.318233	0.354751	0.322177	0.32986	0.376887	0.337904	0.356494	0.418622	0.482835	0.349715	0.357347	0.36502	0.290595	0.333284	0.369575	0.327522	0.343691	0.325983	0.343455	0.523843	1.0977	1.04681	1.06851	0.964889	1.04683	0.989541	0.766184	0.766005	0.763302	0.72594	0.730084	0.882854	0.718762	0.913741	0.893223
Speed (Speed-mmpersec)	SS87279	AirLED6	20	0.297285	0.33847	0.369993	0.432061	0.418897	0.4834	0.391871	0.322817	0.343994	0.415049	0.458995	0.355644	0.347031	0.43056	0.518557	0.420735	0.403548	0.389068	0.453415	0.358431	0.373641	0.361751	0.421081	0.365898	0.32401	0.408188	0.366042	0.345281	0.331619	0.288419	0.703515	1.00977	1.28104	1.21227	1.0481	1.057	1.07864	0.959071	0.913143	0.729165	0.743768	0.849747	0.865721	0.839546	0.860977	0.739142
Speed (Speed-mmpersec)	SS87278	AirLED1	16	0.581594	0.803844	0.635427	0.651924	0.765783	0.666093	0.517168	0.649565	0.685132	0.751053	0.762872	0.959872	0.624679	0.771495	0.744009	0.683175	0.727431	0.537109	0.558271	0.594028	0.857796	0.909018	0.85084	0.672308	0.822072	0.752427	0.656756	0.6622	0.72666	0.769416	0.612789	0.343211	1.1471	1.09819	1.24011	0.923128	0.715293	0.7253	0.921115	0.857334	0.826307	0.719006	0.752459	0.759151	0.646207	0.867381
Speed (Speed-mmpersec)	SS87278	AirLED2	17	0.479817	0.534364	0.578278	0.610173	0.596197	0.766435	0.757988	0.700157	0.710009	0.638708	0.734962	0.756222	0.732726	0.659506	0.756623	0.797582	0.630286	0.711885	0.780158	0.689405	0.602633	0.691112	0.708834	0.695927	0.7061	0.664897	0.791102	0.777038	0.67228	0.835701	0.886627	0.752428	1.00346	1.23708	0.870708	0.783983	0.918526	0.950763	0.943864	0.939642	0.907105	0.951428	0.876739	0.77815	0.706856	0.798547
Speed (Speed-mmpersec)	SS87278	AirLED3	17	0.704135	0.713988	0.613859	0.542213	0.635448	0.660036	0.59903	0.735764	0.559222	0.806442	0.953431	0.829421	0.848244	0.973536	0.7854	0.683421	0.746612	0.785597	0.836245	0.753425	0.753981	0.750561	0.670075	0.809176	0.812349	0.724779	0.721581	0.62594	0.632171	0.645473	0.648745	0.506054	0.866765	1.15701	1.05882	0.949159	1.00058	0.894317	0.876462	0.658081	0.752701	0.801213	0.890488	0.592126	0.749802	0.758377
Speed (Speed-mmpersec)	SS87278	AirLED4	17	0.531571	0.533805	0.514165	0.625049	0.592601	0.643131	0.577809	0.622747	0.67943	0.660417	0.648931	0.673276	0.683007	0.755634	0.594504	0.538052	0.619024	0.723936	0.528783	0.613564	0.609541	0.654028	0.637613	0.633833	0.552761	0.699042	0.773992	0.728406	0.749656	0.84845	0.525912	0.318938	0.918389	0.885674	0.869986	0.802337	0.747609	0.676897	0.819316	0.845696	0.823885	0.720483	0.848977	0.882606	0.795846	0.862205
Speed (Speed-mmpersec)	SS87278	AirLED5	17	0.651717	0.689333	0.729766	0.701657	0.679999	0.657888	0.612248	0.630807	0.680784	0.515469	0.497636	0.502821	0.489405	0.621743	0.650399	0.732421	0.7348	0.684172	0.569363	0.59555	0.575401	0.679536	0.594114	0.546789	0.714941	0.62435	0.591756	0.500886	0.583223	0.594505	0.481667	0.280508	0.684332	0.999743	0.951876	0.939875	0.861224	0.774904	0.871331	0.896532	0.655913	0.531066	0.550195	0.613104	0.686704	0.739422
Speed (Speed-mmpersec)	SS87278	AirLED6	16	0.606174	0.659206	0.634007	0.653497	0.639864	0.679696	0.610008	0.78263	0.611492	0.550809	0.608267	0.533271	0.534761	0.577802	0.428299	0.441573	0.559582	0.54243	0.60405	0.632857	0.522745	0.440974	0.604136	0.634354	0.559204	0.465434	0.441983	0.480673	0.384166	0.4539	0.657924	0.286748	0.669972	0.812624	0.876443	0.848416	0.785046	0.628688	0.764429	0.767823	0.768209	0.716743	0.709387	0.733034	0.713547	0.76144
[truncated: 90 more columns]

## Sheet: Figure8I
				time_1	time_2	time_3	time_4	time_5	time_6	time_7	time_8	time_9	time_10	time_11	time_12	time_13	time_14	time_15	time_16	time_17	time_18	time_19	time_20	time_21	time_22	time_23	time_24	time_25	time_26	time_27	time_28	time_29	time_30	time_31	time_32	time_33	time_34	time_35	time_36	time_37	time_38	time_39	time_40	time_41	time_42	time_43	time_44	time_45	time_46
			Time (s)	0.008	0.028	0.048	0.068	0.088	0.108	0.128	0.148	0.168	0.188	0.208	0.228	0.248	0.268	0.288	0.308	0.328	0.348	0.368	0.388	0.408	0.428	0.448	0.468	0.488	0.508	0.528	0.548	0.568	0.588	0.608	0.628	0.648	0.668	0.688	0.708	0.728	0.748	0.768	0.788	0.808	0.828	0.848	0.868	0.888	0.908
				Mean
DataType	Male	LED	GroupCount	mean_1	mean_2	mean_3	mean_4	mean_5	mean_6	mean_7	mean_8	mean_9	mean_10	mean_11	mean_12	mean_13	mean_14	mean_15	mean_16	mean_17	mean_18	mean_19	mean_20	mean_21	mean_22	mean_23	mean_24	mean_25	mean_26	mean_27	mean_28	mean_29	mean_30	mean_31	mean_32	mean_33	mean_34	mean_35	mean_36	mean_37	mean_38	mean_39	mean_40	mean_41	mean_42	mean_43	mean_44	mean_45	mean_46
ΔProboscis length (mm)	SS87269	off	4	0.00484936	-0.00273077	-0.00193428	-0.00273392	0.00806946	0.00367409	0.00312109	0.00443053	-0.0025507	0.00278059	0.00512597	0.00750944	0.0062897	0.00295989	0.00770039	0.00940676	0.00736326	0.00219131	0.00666849	0.00751106	0.0108231	0.00604782	0.00952927	0.00369514	0.0122263	0.00609374	0.00669401	0.00447559	0.0114659	0.0128996	0.005559	0.00117644	-0.00177108	0.000674986	0.000316542	-0.0037159	-0.00179148	0.00018384	0.00864407	0.00425289	0.00381244	-0.000772621	-0.00579161	-0.00147993	0.0016691	0.00114121
ΔProboscis length (mm)	SS87269	on	4	0.00778915	-0.00865133	-0.0113332	-0.00734683	-0.00697357	8.95001e-05	-0.00799507	-0.000159592	-0.00647466	-0.0058668	0.00259054	0.00590095	0.00628129	0.000673449	-0.00122278	-0.00202947	-0.000332281	0.00316097	-3.53762e-05	0.00525899	-0.00238751	-0.00607792	-0.00120847	0.000222752	-0.00188525	-0.00220858	-0.00543599	-0.00397432	-0.00139623	0.000448975	-0.00897827	-0.00423339	-0.00265617	-0.00249468	-0.00298895	-0.00184708	0.0024784	0.0071759	0.00297609	0.00166091	0.000609096	-0.00306977	0.00121409	-0.00549493	0.00216475	0.00431275
ΔProboscis length (mm)	SS88801	off	3	-0.00392089	-0.00270171	-0.00531924	0.00229382	0.00416587	-0.000574037	0.00066894	0.00273689	-0.000143892	-4.34716e-05	0.00093451	0.00194969	0.00329906	4.61772e-05	-0.000601763	-0.0039974	0.00344095	0.00304275	0.00545152	0.00415506	0.00439315	0.00687493	0.0028013	0.00626441	0.00144568	0.00489623	0.00825328	0.00669856	0.00758574	0.00287181	0.0026396	0.00561692	0.0170754	0.010314	0.0125416	0.012275	0.00804107	0.00674967	0.00338372	-0.00189648	-0.00184372	-0.00272907	-0.00151516	-0.00460655	-0.00338797	-0.00569625
ΔProboscis length (mm)	SS88801	on	3	-0.00411769	-0.00325825	-0.00702259	-0.00186166	-0.00278401	-0.0030968	-0.0053306	0.00380439	-0.00524688	-0.00735643	-0.00586085	-0.00573491	-0.0139274	-0.0122829	-0.0118103	-0.0161364	-0.0127464	-0.0134014	-0.0128853	-0.00380243	-0.00358761	-0.00614528	-0.00599836	0.000516903	0.00383402	0.00305387	0.000423146	0.00322165	0.00587795	0.0063571	0.00842712	0.00507139	0.0110328	0.0026048	0.00615164	0.00988973	0.0115345	0.00963802	0.00569076	0.00678126	0.00553907	-0.00124469	-0.00300291	0.00201912	-0.000176126	-0.00913601
ΔProboscis length (mm)	empty Gal4	off	4	0.0103739	0.00186257	-0.00539837	-0.00463424	-0.00524641	-9.24375e-07	-0.00111644	-0.00106157	0.00558665	0.00976364	0.00030581	0.00770851	0.00444046	0.00917763	0.00523659	0.0075975	0.00547655	0.00103901	0.00302909	-0.000810714	0.0106381	0.0130631	0.0114984	0.00528602	-0.00255776	0.00359841	9.76703e-05	-0.00128152	-0.00214831	-0.00790544	-0.00189871	-0.00336647	-0.0105219	-0.00878716	-0.00373932	-0.00979734	-0.00563342	-0.00508913	-0.00867039	-0.0094005	-0.0158545	-0.00520082	-0.00848905	-0.00541394	-0.00900148	-0.0056108
ΔProboscis length (mm)	empty Gal4	on	4	0.0058677	-0.000257862	-0.00328527	-0.00054168	0.00164983	-0.00162264	-0.00473547	-0.000979872	-0.00558762	-0.00768347	-0.00897776	-0.000592234	-0.00372243	-0.0040731	0.0028349	0.000553287	-0.0103309	-0.0019834	0.000833031	0.0103909	0.00279393	0.000639457	-0.00363142	-0.00435074	0.00413519	0.00941183	0.00547431	0.00205822	0.0104292	0.0192961	0.015116	0.00569775	0.0101241	0.0129495	0.00684265	0.00915479	0.0152387	0.0153027	0.00697484	0.00869673	0.0083388	0.00238314	0.00310862	0.00464053	0.00507981	-0.00405666
				SEM
DataType	Male	LED	GroupCount	sem_1	sem_2	sem_3	sem_4	sem_5	sem_6	sem_7	sem_8	sem_9	sem_10	sem_11	sem_12	sem_13	sem_14	sem_15	sem_16	sem_17	sem_18	sem_19	sem_20	sem_21	sem_22	sem_23	sem_24	sem_25	sem_26	sem_27	sem_28	sem_29	sem_30	sem_31	sem_32	sem_33	sem_34	sem_35	sem_36	sem_37	sem_38	sem_39	sem_40	sem_41	sem_42	sem_43	sem_44	sem_45	sem_46
ΔProboscis length (mm)	SS87269	off	4	0.0120123	0.00809724	0.00799254	0.00360252	0.000762223	0.00234484	0.0027408	0.00340466	0.00519655	0.00542562	0.00303002	0.0062177	0.00411461	0.00301723	0.00254449	0.00703655	0.0102513	0.0110499	0.00851345	0.00617026	0.00570845	0.00493886	0.00732644	0.00570885	0.00653978	0.00669097	0.00767397	0.0062315	0.0131296	0.00571008	0.0026971	0.00133389	0.00401084	0.0037985	0.00392865	0.00319217	0.00371727	0.00744891	0.0112653	0.00732224	0.00827716	0.00449408	0.00409003	0.0055437	0.0152511	0.0144179
ΔProboscis length (mm)	SS87269	on	4	0.023344	0.00725772	0.00507436	0.00436596	0.00502895	0.00320216	0.005534	0.0061405	0.0067551	0.0062201	0.00733816	0.00788076	0.00540855	0.00793928	0.00470021	0.00771904	0.00464195	0.000727746	0.00509899	0.000917344	0.0048032	0.00433175	0.004964	0.00292038	0.00526762	0.00437543	0.00423412	0.00370835	0.00410558	0.00267833	0.00493102	0.00472978	0.00272624	0.00144492	0.00161131	0.00139211	0.0028261	0.00488278	0.00451284	0.00216818	0.0053407	0.00194248	0.00238566	0.00271794	0.0031424	0.00613417
ΔProboscis length (mm)	SS88801	off	3	0.00330922	0.00358104	0.00104271	0.000391552	0.00170908	0.00365909	0.00211954	0.0045129	0.00706196	0.00655019	0.00570281	0.00693632	0.00541035	0.00766001	0.0107183	0.00903226	0.00560211	0.00907522	0.00468883	0.00427812	0.00442968	0.00391587	0.00719128	0.00627637	0.00595353	0.00692149	0.00607819	0.00680192	0.00636089	0.00297077	0.00603328	0.00664725	0.00361408	0.0061887	0.00838227	0.00638407	0.00408714	0.00260485	0.00492429	0.00496689	0.00300573	0.0010838	0.00143506	0.00209961	0.00288362	0.00227463
ΔProboscis length (mm)	SS88801	on	3	0.00545691	0.0062684	0.00835745	0.00521364	0.00675738	0.00902756	0.00946036	0.00722841	0.00379132	0.00839349	0.00781848	0.00783012	0.00361911	0.0025315	0.00582326	0.0079767	0.0132569	0.0153005	0.0112834	0.0140942	0.0106187	0.0160352	0.0130717	0.0106474	0.0159983	0.0166225	0.01474	0.014723	0.0109819	0.00752571	0.00672551	0.00846394	0.00530077	0.00677027	0.00490528	0.00484231	0.00578711	0.0044004	0.00375721	0.00598676	0.00253707	0.00735688	0.00763914	0.00582191	0.00662623	0.00920338
ΔProboscis length (mm)	empty Gal4	off	4	0.00716002	0.00663625	0.00961636	0.00663173	0.00432138	0.00646282	0.00655209	0.00377857	0.00468865	0.00378264	0.00491153	0.00467743	0.00453558	0.00514972	0.00738378	0.00558096	0.00406272	0.00434017	0.00457064	0.00425162	0.009274	0.00726463	0.00555639	0.00731259	0.00866662	0.0103288	0.00663634	0.00467688	0.00741846	0.00660119	0.0031101	0.00317046	0.00497382	0.00478107	0.00428707	0.00222523	0.0039662	0.00447681	0.00659181	0.00891877	0.00261833	0.00770947	0.00341601	0.00084692	0.00348365	0.00373717
ΔProboscis length (mm)	empty Gal4	on	4	0.0130038	0.011621	0.00733412	0.0100487	0.00994766	0.00972585	0.0086569	0.00675766	0.0115451	0.00882152	0.0113689	0.00540887	0.00726508	0.0094128	0.00692737	0.00721417	0.00152308	0.00596961	0.0104097	0.014232	0.0131486	0.0127569	0.0120238	0.0138869	0.0162042	0.00679828	0.0109742	0.0144331	0.0146258	0.0108997	0.0182033	0.0117893	0.0118346	0.00927099	0.00661446	0.00664193	0.00717441	0.00469178	0.0116916	0.0103853	0.00767599	0.0110311	0.00904413	0.00655742	0.00469119	0.00546619
[truncated: 704 more columns]
